# Supplementary material for: Sulfonic acid-functionalized periodic mesoporous organosilicas in esterification and selective acylation reactions
Source: Royal Society of Chemistry journal article supplement (doi:10.1039/c5cy00267b), 2015-01-01
Supplement: c5cy00267b1.pdf [file c5cy00267b1.pdf]

## Periodic mesoporous organosilica functionalized sulfonic acid in the esterification and selective acylation reactions

Babak Karimi,<sup>\*a</sup> Hamid M. Mirzaei<sup>a</sup> and Akbar Mobaraki<sup>a</sup>

Department of Chemistry, Institute for Advanced Studies in Basic Sciences (IASBS), Zanjan, Iran

Fax: (+98)-24-3315-3232, E-mail: karimi@iasbs.ac.ir

### Table of Contents

|                                                                      |    |
|----------------------------------------------------------------------|----|
| 1-1. General.....                                                    | 2  |
| 1-2. Chemicals .....                                                 | 2  |
| 1-3. Preparation of Et-PMO-Me-PrSO <sub>3</sub> H (1b) .....         | 2  |
| 1-4. Preparation of Ph-PMO-Me-PrSO <sub>3</sub> H (1a).....          | 2  |
| 1-5. Preparation of SBA-15-Pr-SH.....                                | 2  |
| 1-6. Preparation of SBA-15-Ph-PrSH <sup>3</sup> .....                | 3  |
| 1-7. Preparation of SBA-15-PrSO <sub>3</sub> H .....                 | 3  |
| 1-8. Preparation of SBA-15-Ph-PrSO <sub>3</sub> H <sup>2</sup> ..... | 3  |
| 1-9. Characterization.....                                           | 3  |
| 1-10. Characterization of the products.....                          | 13 |
| 1-11. <sup>1</sup> H, <sup>13</sup> CNMR, and FT-IR spectra .....    | 19 |
| 1-12 Refrences .....                                                 | 57 |

## 1. Experimental Procedure

### 1-1. General

<sup>1</sup>H NMR spectra were recorded on commercial instruments (250 MHz and 400 MHz). Chemical shifts were reported in ppm with the solvent resonance as the internal standard (CDCl<sub>3</sub>: δ= 7.26). Spectra are reported as follows: chemical shift (= ppm), multiplicity (s= singlet, d= doublet, t= triplet, q= quartet, m= multiplet), coupling constants (Hz), integration. <sup>13</sup>C NMR spectra were collected on commercial instruments (62.90 MHz and 100.60 MHz) with complete proton decoupling. Reagents obtained from commercial sources were used without further purification. Thermal treatments were conducted from room temperature to 800 °C in argon flow using a Pheometric Scientific analyzer.

### 1-2. Chemicals

BTEB (1,4-bis(triethoxysilyl)benzene), BTEE (1,2-bis(triethoxysilyl)ethane), MPMDS (3-mercaptopropylmethyldimethoxysilane), and triblock co-polymer P123 (Eo<sub>70</sub> Po<sub>20</sub> Eo<sub>70</sub>) were obtained from Aldrich and used as received.

### 1-3. Preparation of Et-PMO-Me-PrSO<sub>3</sub>H (1b)

Organosulfonic acid-functionalized mesoporous organosilicas (1a and 1b) were synthesized as our previous publication:<sup>1</sup>

In this synthesis procedure, P123 (1.95 g) was added under vigorous stirring to 70 ml of HCl solution (2N). After complete dissolution of surfactant at 35 °C, BTEE (2.77 g) was added and the agitation was continued for 3h before the drop wise incorporation of MPMDS (0.478 g). The stirring was followed for 24 h at 35 °C. Then the suspension was aged for 24 h at 87 °C. The solid material were separated by filtration, washed with deionized water and dried at room temperature. The surfactant was removed by solvent extraction with anhydrous ethanol in a soxhlet apparatus for 24 h. Typically, 0.2 g of extracted material was contacted with 8 g H<sub>2</sub>O<sub>2</sub> (30 wt%) and the suspension was stirred at room temperature for 24 h. After filtration and washing with deionized water and warm ethanol separately, the oxidized samples were acidified in 100 ml 0.1M H<sub>2</sub>SO<sub>4</sub> solution during 2 h. Next, the samples were washed thoroughly with deionized water until neutral pH, filtered and vacuum dried at 60 °C overnight.

### 1-4. Preparation of Ph-PMO-Me-PrSO<sub>3</sub>H (1a)

In a typical one-step synthesis, 0.66 g pluronic P123 was dissolved in 23.6 g deionized water, 0.57 g H<sub>2</sub>O<sub>2</sub> (30wt%), and 0.13 g of HCl (37 wt%). Then 0.47 g BTEB and 0.0902 g (30 mol% in total silica precursors) of MPMDS were added to the solution. The resulting mixture was agitated for 2 h at 40 °C and thereafter aged for 24 h at 100 °C. The resulting solid material was filtered and air-dried. To extract the residual block co-polymer, the solid material (0.5 g) was stirred in acetone (60 ml) for 10 h at 56 °C, followed by washing with deionized water. The final products were obtained after drying the samples in oven for 1 day at 100 °C.

### 1-5. Preparation of SBA-15-Pr-SH

The synthesis of SBA-15-PrSH has been achieved similar to our previous publication<sup>1</sup> using known procedure described by Stucky and his co-workers.<sup>2</sup> This procedure involved a synthetic strategy based on cocondensation of tetraethoxysilane (TEOS) and 3-mercaptopropyltrimethoxysilane (MPTMS) in the presence of Pluronic P123 as structure

directing agent. In a typical preparation procedure, 4.0 g of Pluronic P123 (Aldrich, average  $M_w = 5800$ ) was dissolved in 125 g of 1.9 M HCl solution with stirring at room temperature. The solution was heated to 40 °C before adding 6.83g TEOS. After 3 h pre-hydrolysis of TEOS, 1.6 g thiol precursor MPTMS was added. The resultant solution was stirred for 20 h at 40 °C, after which the mixture was aged at 100 °C for 24 h under static conditions. The solid was recovered by filtration and air dried at room temperature overnight. The template was removed from the as-synthesized material by washing with ethanol using a Soxhlet apparatus for 24 h.

### **1-6. Preparation of SBA-15-Ph-PrSH<sup>3</sup>**

To a suspension of SBA-15-Pr-SH (3 g) in dry toluene  $\text{PhSi}(\text{OEt})_3$  (PTES, 4 mmol) was added. The resulting mixture was first stirred at room temperature for 1 h and then refluxed for further 24 h. The solid materials was filtered and successively washed with toluene, EtOH, and Et<sub>2</sub>O and dried overnight at 120 °C to afford the corresponding SBA-15-Ph-PrSH.

### **1-7. Preparation of SBA-15-PrSO<sub>3</sub>H**

Typically, 0.3 g of SBA-15-Pr-SH was suspended in 10 g of aqueous 30 wt% H<sub>2</sub>O<sub>2</sub>. This suspension was stirred at room temperature in an Ar atmosphere for 24 h. After the oxidation treatment, the resulting solution was filtered and washed separately with water and ethanol. Finally the wet material was suspended in 1M H<sub>2</sub>SO<sub>4</sub> solution for 2 h and then was washed several times with deionized water and ethanol and dried at 60 °C under vacuum overnight to give the corresponding catalyst.

### **1-8. Preparation of SBA-15-Ph-PrSO<sub>3</sub>H<sup>2</sup>**

Conversion of thiol groups of catalyst to sulfonic acid moiety was accomplished by hydrogen peroxide. Typically, 0.3 g of solid hydrophobic material was suspended in 10 g of aqueous 30 wt% H<sub>2</sub>O<sub>2</sub>. This suspension was stirred at room temperature in an Ar atmosphere for 24 h. After the oxidation treatment, the resulting solution was filtered and washed separately with water and ethanol. Finally the wet material was suspended in 1M H<sub>2</sub>SO<sub>4</sub> solution for 2 h and then was washed several times with water and ethanol and dried at 60 °C under vacuum overnight to give the corresponding catalyst.

### **1-9. Characterization**

The textural properties of the functionalized mesoporous organosilicas were measured from nitrogen adsorption-desorption isotherms at 77 k with a BELSORB system. The surface area and pore size distribution were calculated with the BET and BJH methods, respectively. Organic material present in the solids was determined by elemental analysis and the organic composition of the modified mesoporous materials was determined by thermogravimetric analysis (TGA) and differential thermoanalysis (DTA) with TGA Q50 V6.3 Build 189 instrument, with heating from room temperature to 800 °C under Argon flow. The ion exchange capacities of the functionalized mesoporous organosilicas were determined by acid-base titration and pH metery. The TEM images also demonstrate that the mesostructures Et-PMO-Me-PrSO<sub>3</sub>H exhibit ordered 2D-hexagonal (p6mm) patterns.

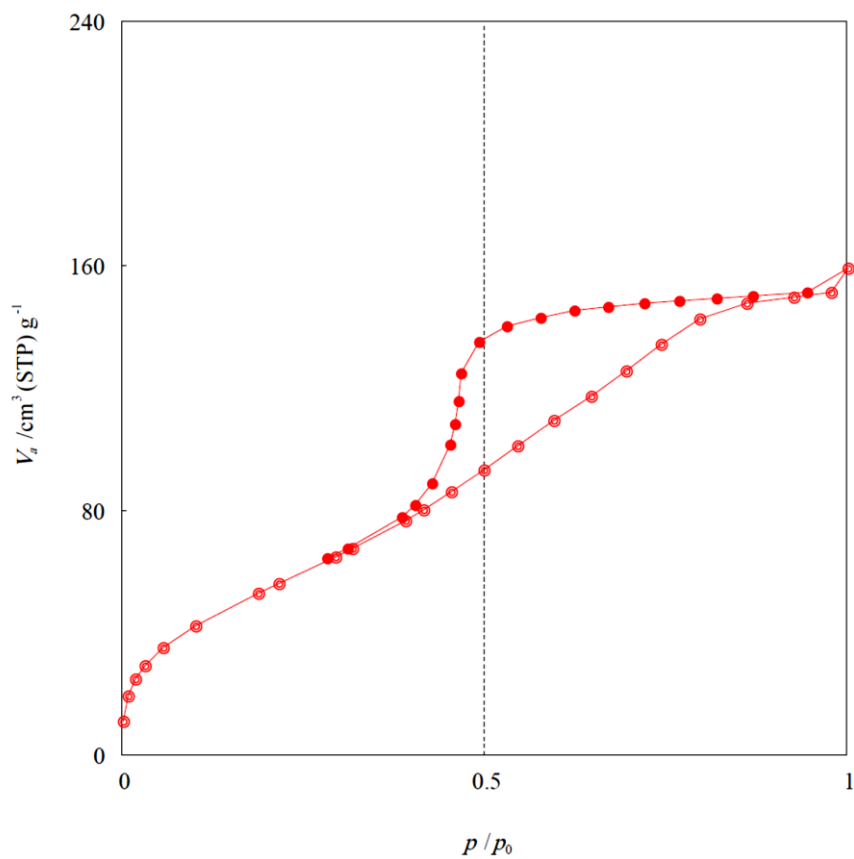

**Fig. S1. N<sub>2</sub> adsorption-desorption of Et-PMO-Me-PrSH**

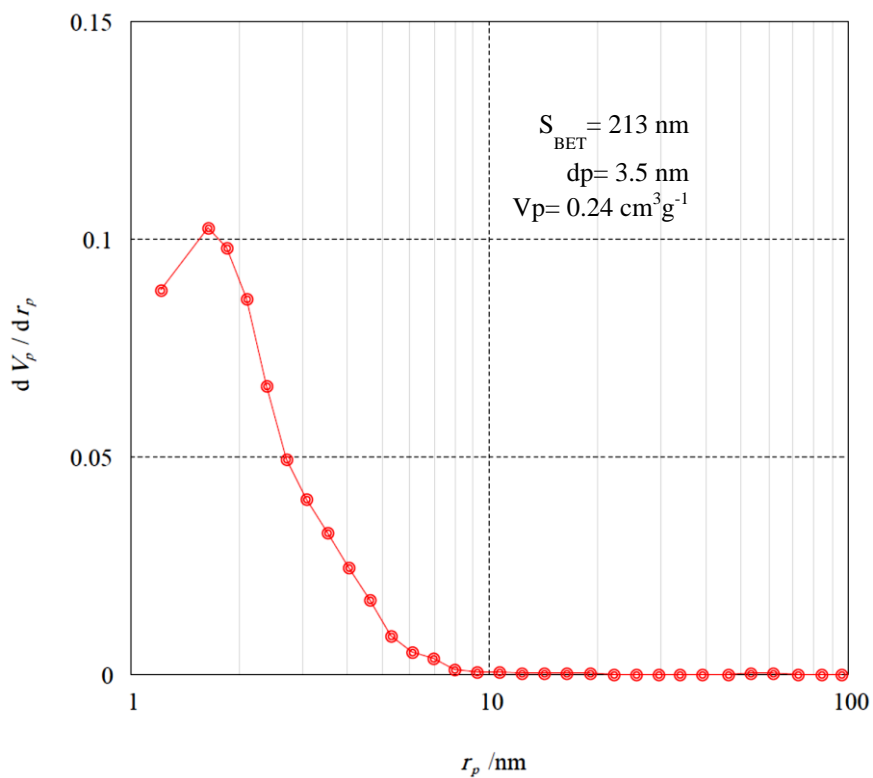

**Fig. S2. BJH analysis of Et-PMO-Me-PrSH**

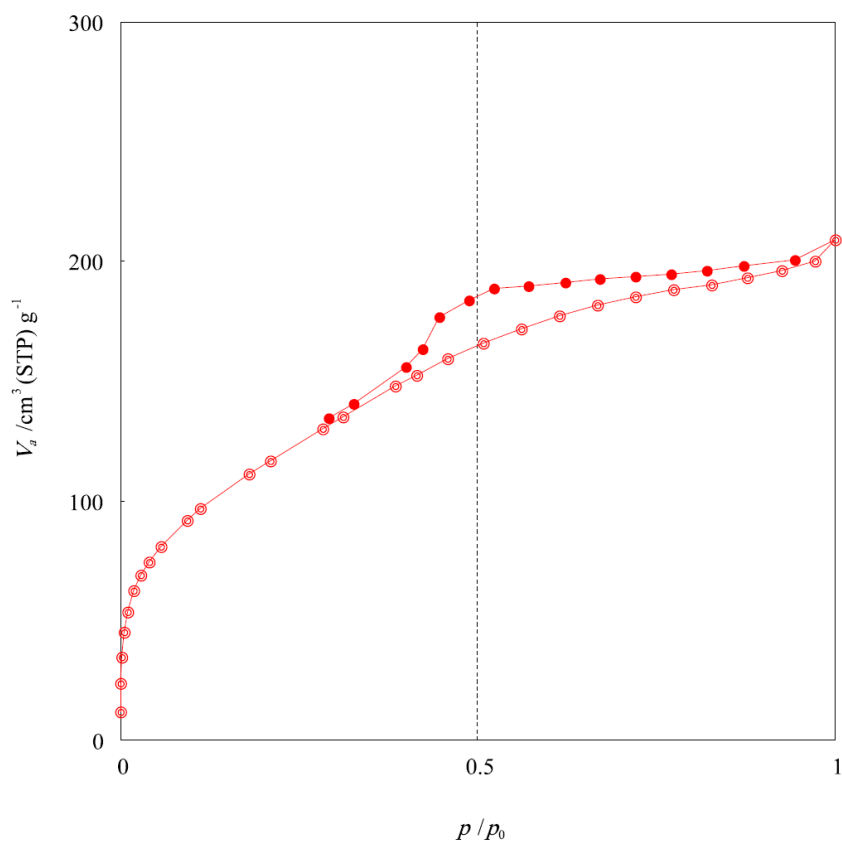

**Fig. S3.** N<sub>2</sub> adsorption-desorption of Et-PMO-Me-PrSO<sub>3</sub>H catalyst

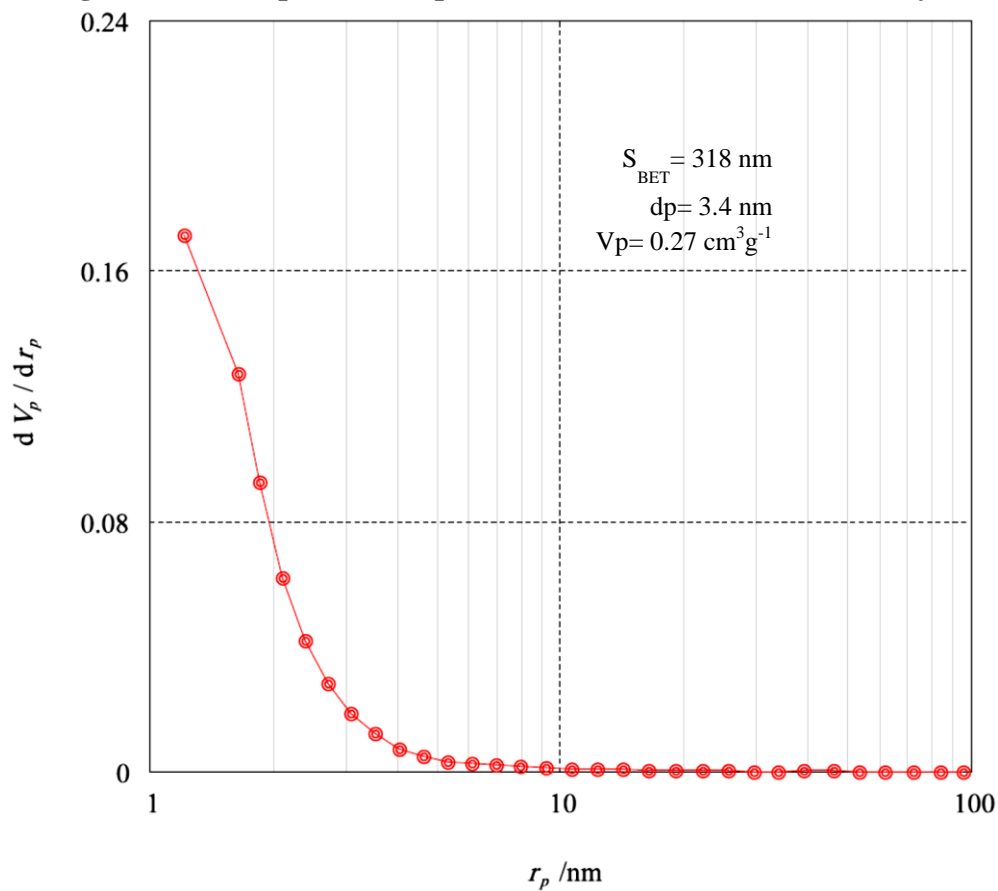

**Fig. S4.** BJH analysis of Et-PMO-Me-PrSO<sub>3</sub>H catalyst

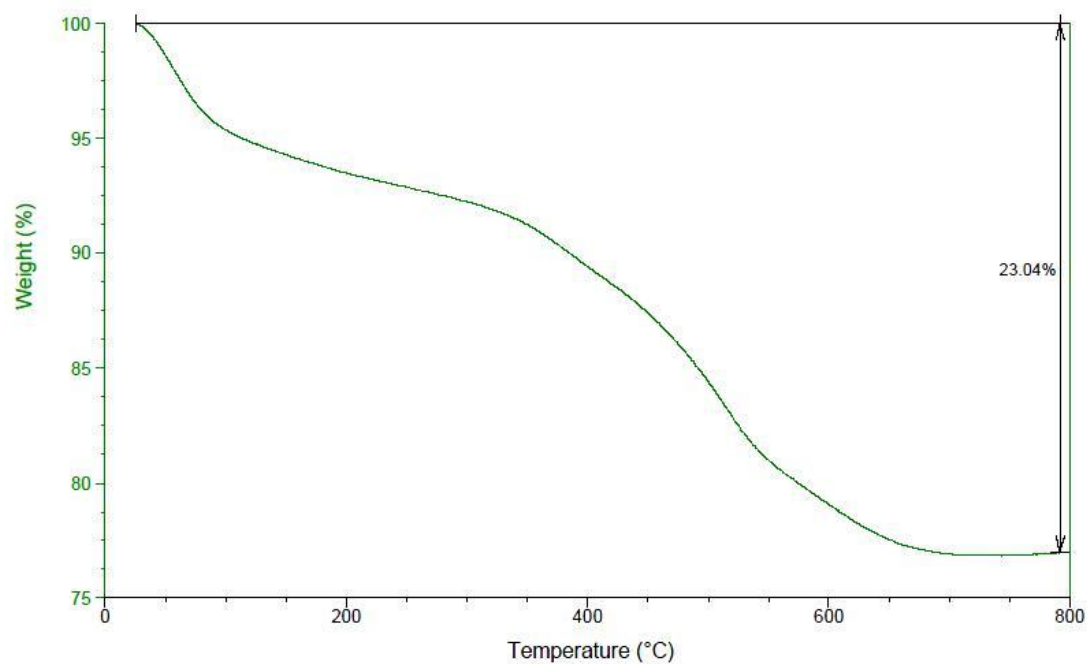

**Fig. S5. TGA analysis of Et-PMO-Me-PrSO<sub>3</sub>H catalyst**

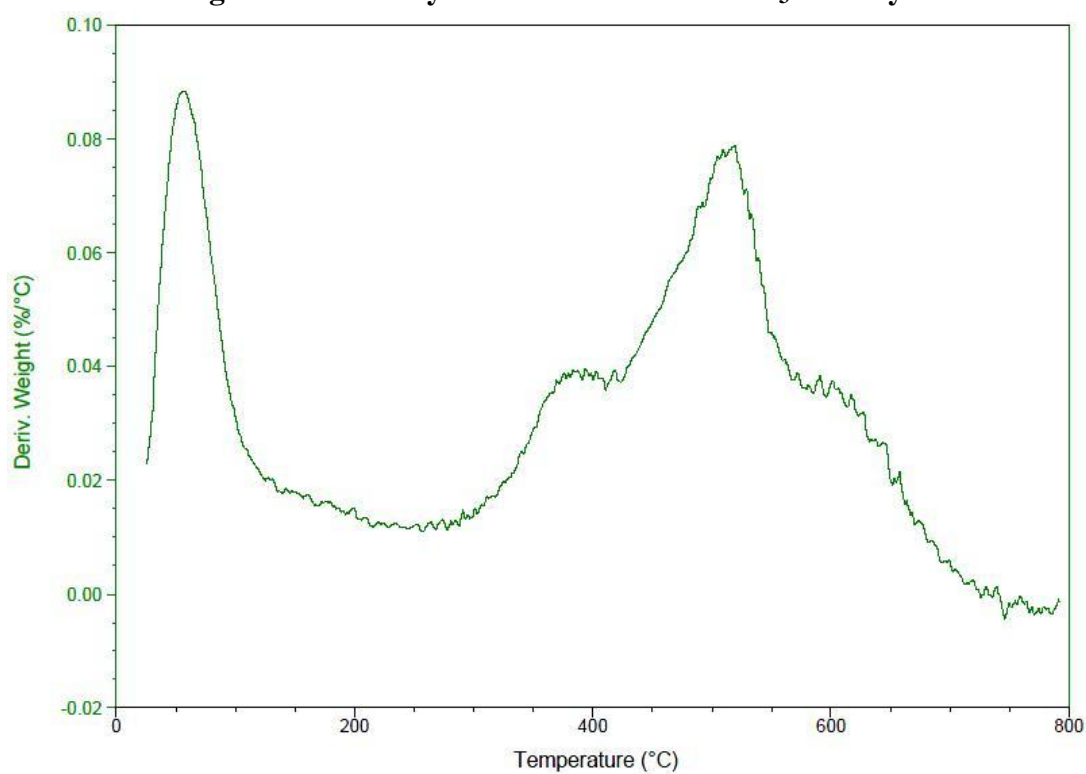

**Fig. S6. DTA diagram for Et-PMO-Me-PrSO<sub>3</sub>H catalyst**

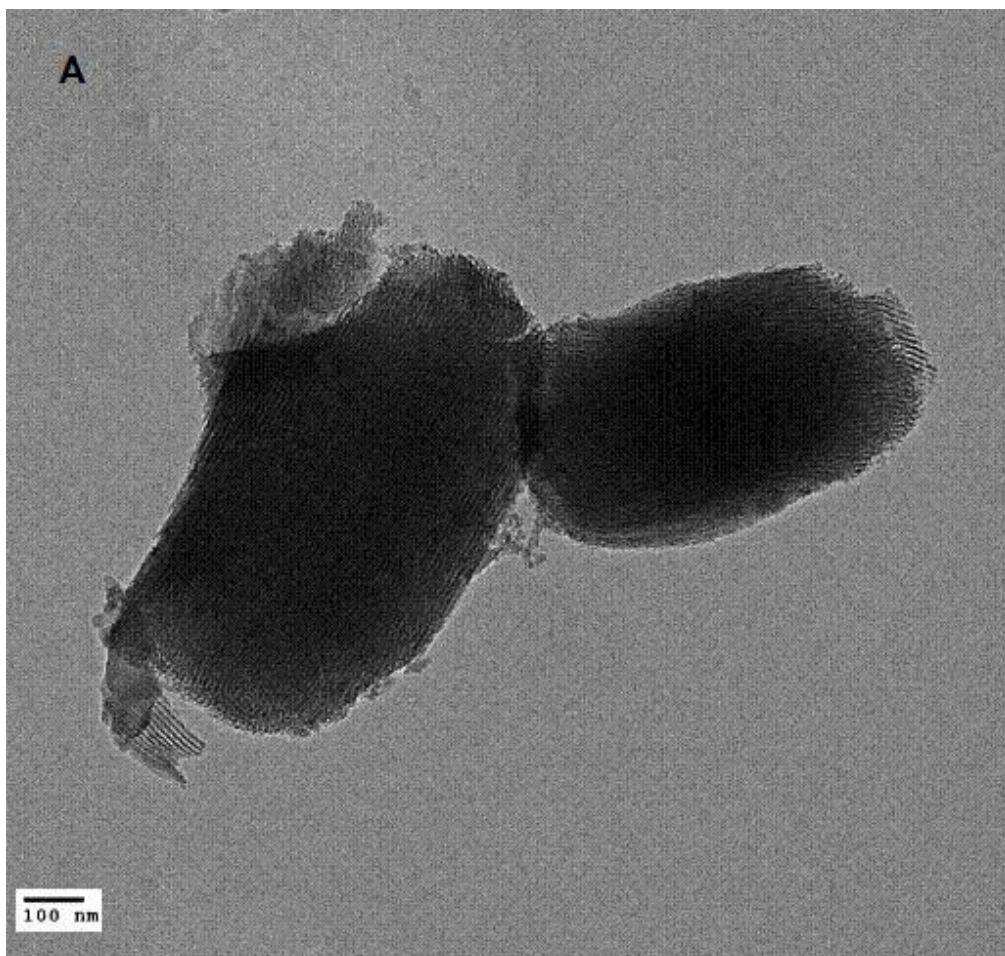

**Fig. S7.** TEM image of Et-PMO-Me-PrSO<sub>3</sub>H catalyst

## Hydrophilicity index

H-index developed by Thommes is measured according to the volume of liquid adsorbed using Gurvich rule (Eq. 1). The Gurvich rule allows conversion of the adsorbed amount (at a relative pressure of 0.92) into a pore volume by assuming that the pores are filled with the liquid adsorptive (at  $P/P^0=0.92$  all micro- and mesoporous are filled with the liquid adsorptive).

$$\text{(Eq. 1): } V_p = V_a / 22414 \times M_g / \rho_a$$

Where  $M_g$  is molecular weight of the adsorptive gas and  $\rho_a$  is density of adsorptive.

Having  $\rho_a$  (nitrogen) = 0.808 g/cm<sup>3</sup> and  $\rho_a$  (water) = 0.997 g/cm<sup>3</sup>

$$\text{Thus: } V_p(\text{nitrogen}) = V_a(\text{nitrogen}) \times 0.001547$$

$$V_p(\text{water}) = V_a(\text{water}) \times 0.0008055$$

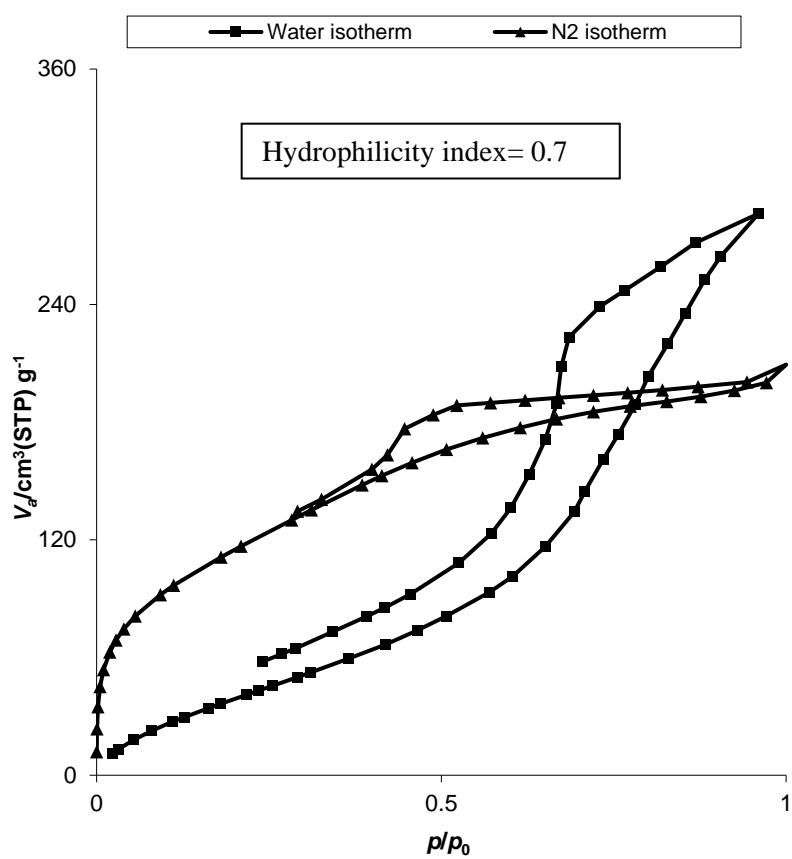

**Fig. S8.** Both nitrogen and water sorption analysis of **1b** catalyst



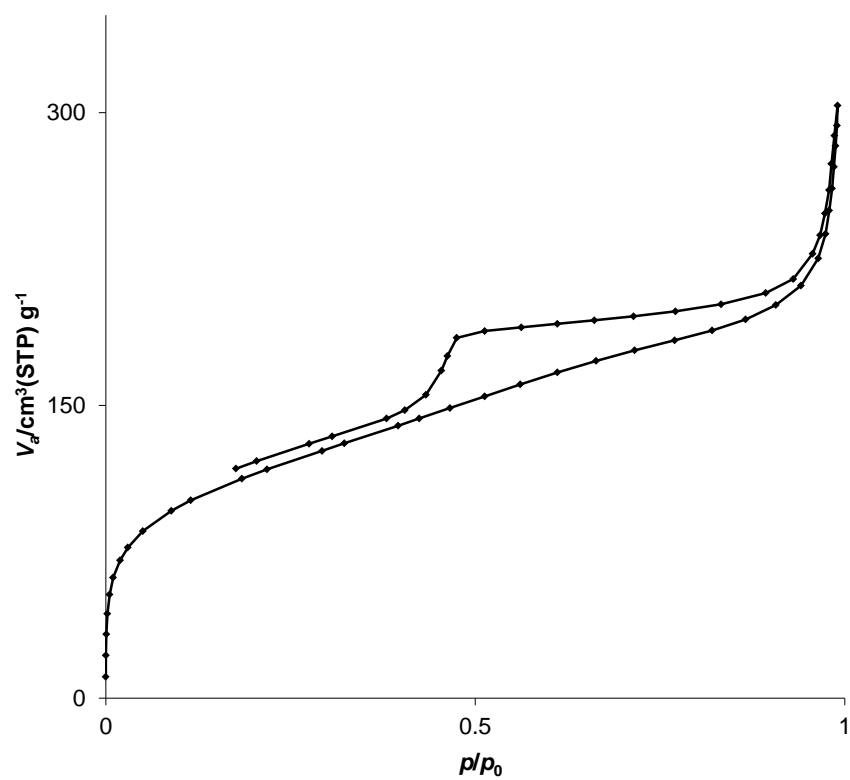

Fig. S9. N<sub>2</sub> adsorption-desorption of Ph-PMO-Me-PrSO<sub>3</sub>H catalyst

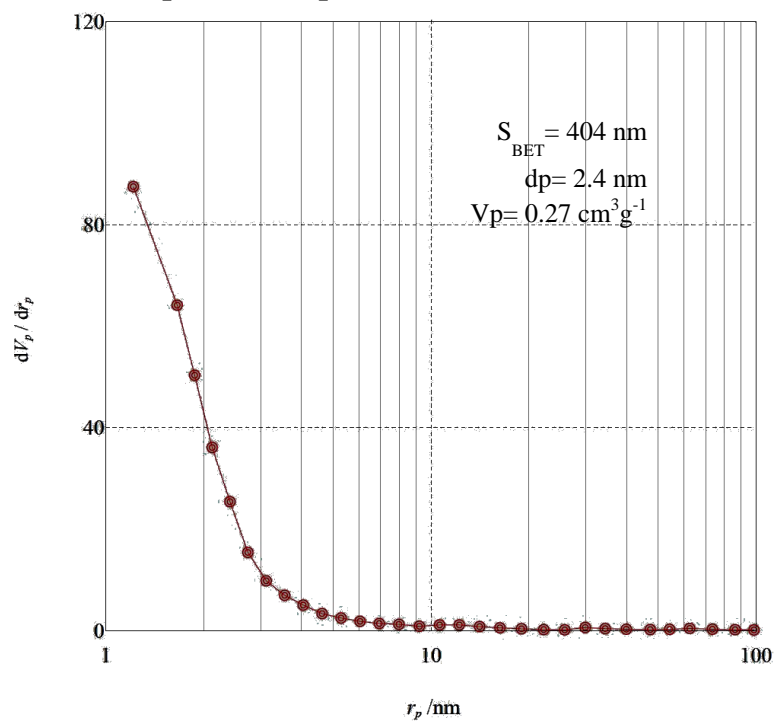

Fig. S10. BJH analysis of Ph-PMO-Me-PrSO<sub>3</sub>H catalyst

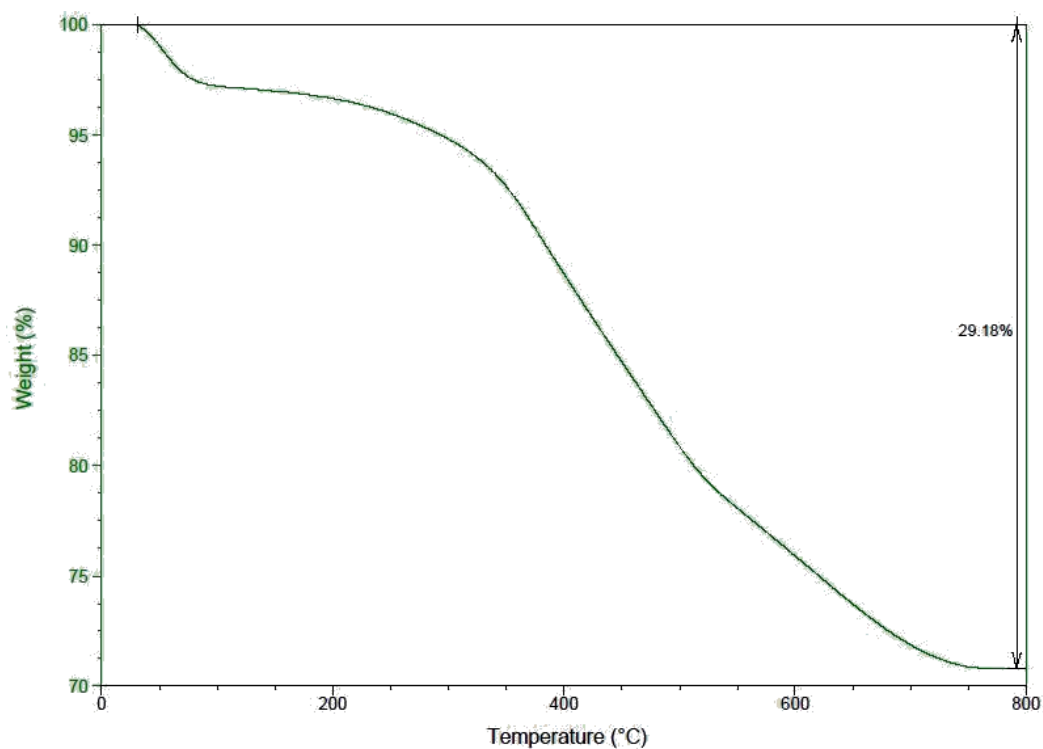

**Fig. S11. TGA analysis of Ph-PMO-Me-PrSO<sub>3</sub>H catalyst**

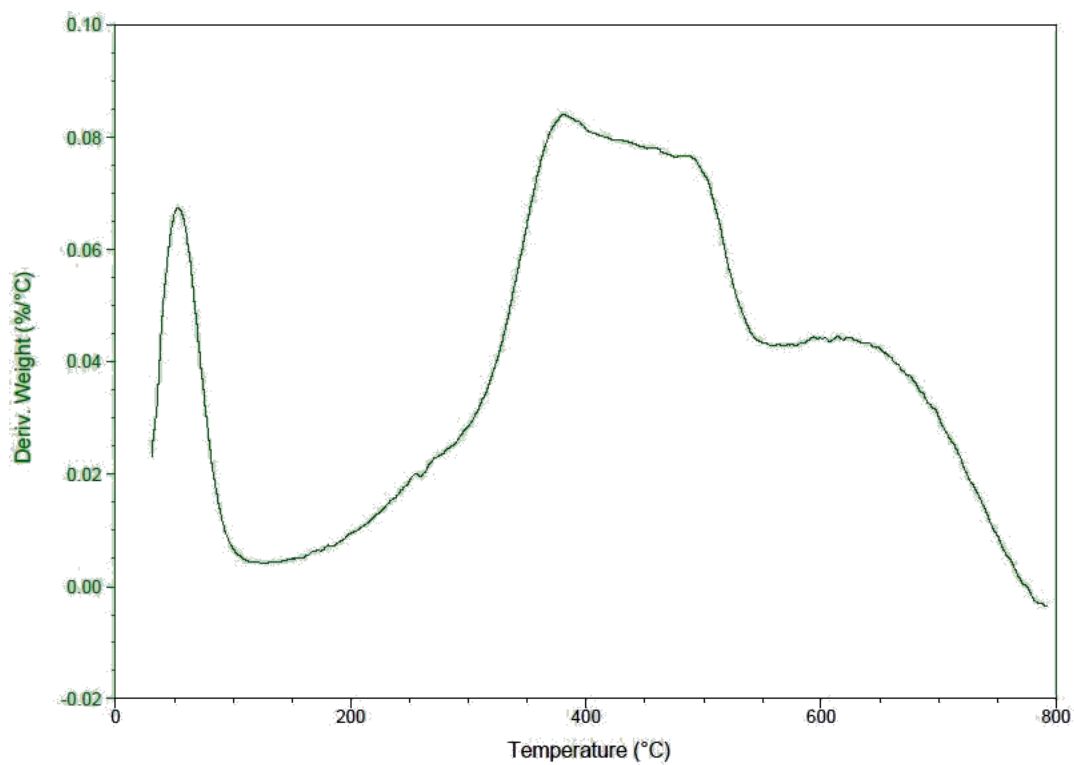

**Fig. S12. DTA diagram for Ph-PMO-Me-PrSO<sub>3</sub>H catalyst**

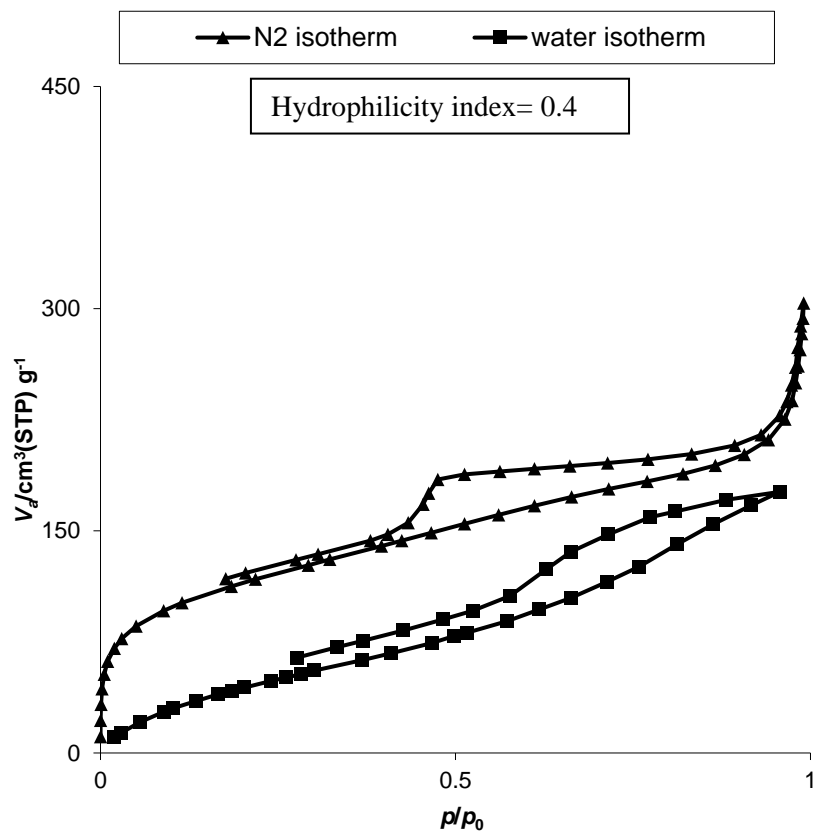

**Fig. S13.** Both nitrogen and water sorption analysis of **1a** catalyst

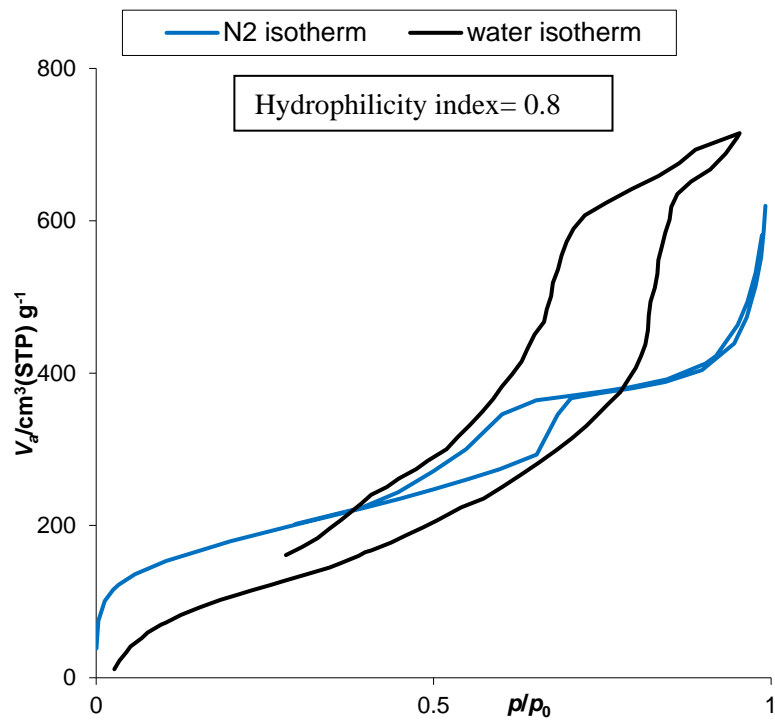

Fig. S14. Both nitrogen and water sorption analysis of **SBA-15-PrSO<sub>3</sub>H** catalyst

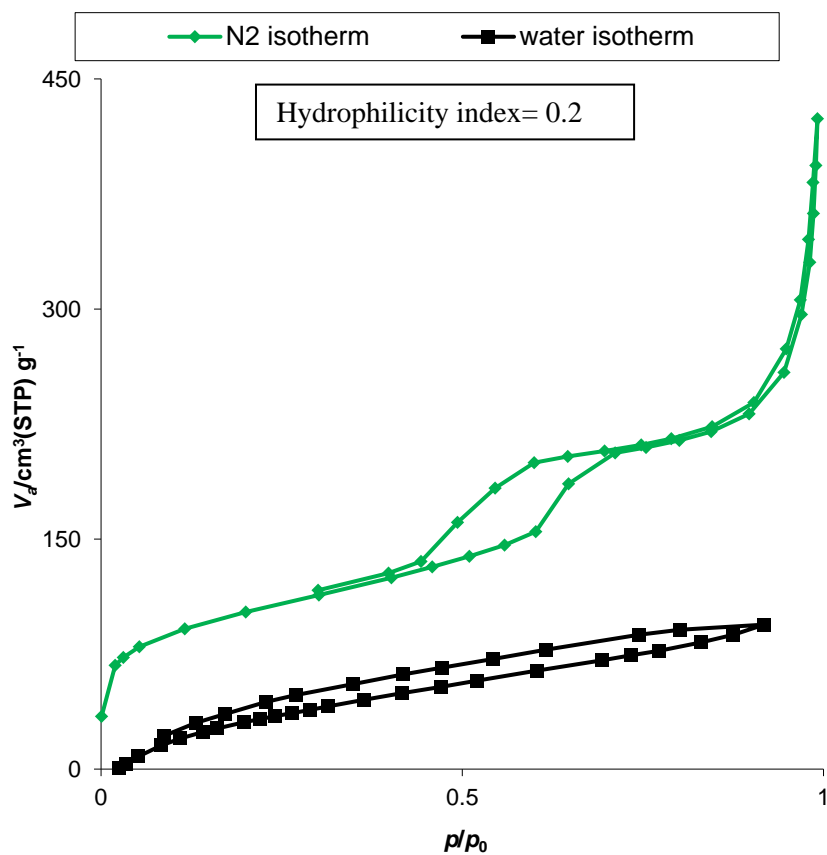

Fig. S15. Both nitrogen and water sorption analysis of **SBA-15-Ph-PrSO<sub>3</sub>H** catalyst

## 1-10. Characterization of the products

### 1. Methyl laurate

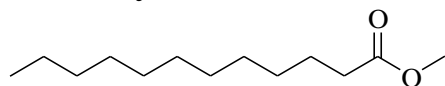

$^1\text{H}$  NMR (250 MHz;  $\text{CDCl}_3$ ):  $\delta_{\text{H}} = 3.65$  (s, 3H), 2.28 (t,  $J = 7.2$  Hz, 2H), 1.50-1.70 (qui,  $J = 6.7$  Hz, 2H), 1.24 (brs, 16H), 0.86 (t,  $J = 6.5$  Hz, 3H);  $^{13}\text{C}$  NMR (62.9 MHz,  $\text{CDCl}_3$ ):  $\delta_{\text{C}} = 174.3$ , 51.4, 34.0, 31.8, 29.5, 29.4, 29.3, 29.2, 29.1, 24.9, 22.6, 14.0

IR (neat): 723, 872, 1017, 1113, 1172, 1362, 1451, 1743, 2925

### 2. Methyl palmitate

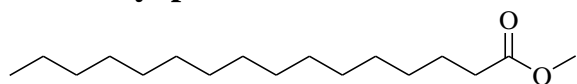

$^1\text{H}$  NMR (250 MHz;  $\text{CDCl}_3$ ):  $\delta_{\text{H}} = 3.65$  (s, 3H), 2.29 (t,  $J = 7.5$  Hz, 2H), 1.55-1.67 (quin,  $J = 7$  Hz, 2H), 1.24 (brs, 24H), 0.86 (t,  $J = 6.0$  Hz, 3H);  $^{13}\text{C}$  NMR (62.9 MHz,  $\text{CDCl}_3$ ):  $\delta_{\text{C}} = 174.3$ , 51.4, 34.1, 31.9, 29.6, 29.5, 29.4, 29.3, 29.2, 29.1, 24.9, 22.6, 14.1

IR (neat): 591, 723, 873, 1016, 1114, 1169, 1245, 1364, 1454, 2037, 2678, 2923

### 3. Methyl stearate

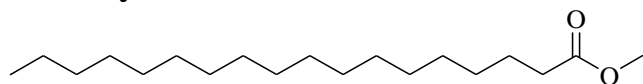

$^1\text{H}$  NMR (250 MHz;  $\text{CDCl}_3$ ):  $\delta_{\text{H}} = 3.65$  (s, 3H), 2.29 (t,  $J = 7.5$  Hz, 2H), 1.55-1.65 (quin,  $J = 6.5$  Hz, 2H), 1.24 (brs, 28H), 0.86 (t,  $J = 6.0$  Hz, 3H);  $^{13}\text{C}$  NMR (62.9 MHz,  $\text{CDCl}_3$ ):  $\delta_{\text{C}} = 174.3$ , 51.4, 34.1, 31.9, 29.6, 29.5, 29.4, 29.3, 29.2, 29.1, 24.9, 22.6, 14.1

IR (neat): 585, 724, 805, 882, 1029, 1108, 1172, 1255, 1376, 1465, 1629, 1742, 2919

### 4. Methyl-3-phenylpropanoate

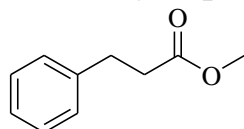

$^1\text{H}$  NMR (250 MHz;  $\text{CDCl}_3$ ):  $\delta_{\text{H}} = 7.00$ -7.38 (m, 5H), 3.67 (s, 3H), 2.96 (t,  $J = 7.5$  Hz, 2H), 2.63 (t,  $J = 7.5$  Hz, 2H);  $^{13}\text{C}$  NMR (62.9 MHz,  $\text{CDCl}_3$ ):  $\delta_{\text{C}} = 173.3$ , 140.5, 128.5, 128.2, 126.2, 51.6, 35.7, 30.9

IR (neat): 500, 559, 701, 748, 832, 990, 1029, 1078, 1162, 1254, 1362, 1443, 1494, 1602, 1637, 1737, 2950, 3026

### 5. Methyl hexanoate

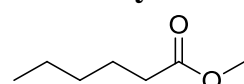

$^1\text{H}$  NMR (250 MHz;  $\text{CDCl}_3$ ):  $\delta_{\text{H}} = 3.64$  (s, 3H), 2.23-2.32 (m, 2H), 1.27-1.90 (m, 11H);  $^{13}\text{C}$  NMR (100.6 MHz,  $\text{CDCl}_3$ ):  $\delta_{\text{C}} = 176.6$ , 51.4, 43.0, 28.9, 25.7, 25.4

IR (neat): 457, 606, 709, 754, 803, 890, 989, 1038, 1175, 1246, 1317, 1372, 1445, 1736, 2934

## 6. Octyl acetate

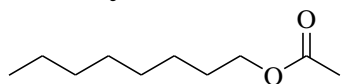

$^1\text{H}$  NMR (400 MHz;  $\text{CDCl}_3$ ):  $\delta_{\text{H}} = 4.06$  (t,  $J = 6.8$  Hz, 2H), 2.05 (s, 3H), 1.59-1.67 (quin,  $J = 6.8$  Hz, 2H), 1.29 (m, 10H), 0.89 (t,  $J = 6.8$  Hz, 3H);  $^{13}\text{C}$  NMR (100.6 MHz,  $\text{CDCl}_3$ ):  $\delta_{\text{C}} = 171.2, 64.6, 31.7, 29.2, 29.1, 28.6, 25.9, 22.6, 20.9, 14.1$

IR (neat): 605, 638, 725, 807, 881, 964, 1040, 1240, 1372, 1461, 1742, 2927

## 7. Nonyl acetate

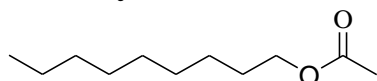

$^1\text{H}$  NMR (250 MHz;  $\text{CDCl}_3$ ):  $\delta_{\text{H}} = 4.02$  (t,  $J = 6.8$  Hz, 2H), 2.01 (s, 3H), 1.54-1.68 (quin,  $J = 6.8$  Hz, 2H), 1.24 (brs, 12H), 0.85 (t,  $J = 6.2$  Hz, 3H);  $^{13}\text{C}$  NMR (62.9 MHz,  $\text{CDCl}_3$ ):  $\delta_{\text{C}} = 171.1, 64.6, 31.8, 29.4, 29.2, 29.2, 28.5, 25.8, 22.6, 20.9, 14.0$

IR (neat): 485, 605, 638, 723, 806, 886, 1039, 1239, 1372, 1461, 1742, 2926

## 8. Decyl acetate

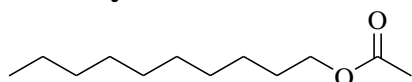

$^1\text{H}$  NMR (250 MHz;  $\text{CDCl}_3$ ):  $\delta_{\text{H}} = 4.03$  (t,  $J = 6.8$  Hz, 2H), 2.03 (s, 3H), 1.55-1.65 (quin,  $J = 6.8$  Hz, 2H), 1.25 (brs, 14H), 0.86 (t,  $J = 6.2$  Hz, 3H);  $^{13}\text{C}$  NMR (62.9 MHz,  $\text{CDCl}_3$ ):  $\delta_{\text{C}} = 171.2, 64.6, 31.8, 29.5, 29.2, 29.2, 28.5, 25.8, 22.6, 21.0, 14.0$

IR (neat): 455, 607, 723, 805, 881, 1041, 1240, 1371, 1460, 1742, 2926

## 9. Octadecyl acetate

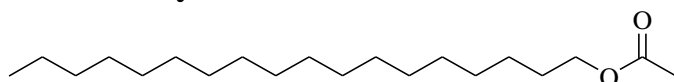

$^1\text{H}$  NMR (400 MHz;  $\text{CDCl}_3$ ):  $\delta_{\text{H}} = 4.07$  (t,  $J = 6.8$  Hz, 2H), 2.06 (s, 3H), 1.60-1.67 (quin,  $J = 6.8$  Hz, 2H), 1.27 (brs, 30H), 0.90 (t,  $J = 6.8$  Hz, 3H);  $^{13}\text{C}$  NMR (100.6 MHz,  $\text{CDCl}_3$ ):  $\delta_{\text{C}} = 171.2, 64.6, 31.9, 29.7, 29.6, 29.6, 29.5, 29.3, 29.2, 28.6, 25.9, 22.7, 21.0, 14.1$

IR (neat): 605, 638, 722, 890, 971, 1040, 1238, 1370, 1460, 1743, 2924

## 10. Benzyl acetate

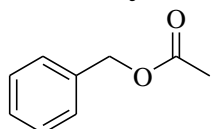

$^1\text{H}$  NMR (250 MHz;  $\text{CDCl}_3$ ):  $\delta_{\text{H}} = 7.25-7.35$  (m, 5H), 5.11 (s, 2H), 2.10 (s, 3H);  $^{13}\text{C}$  NMR (62.9 MHz,  $\text{CDCl}_3$ ):  $\delta_{\text{C}} = 170.8, 135.9, 128.5, 128.2, 128.2, 66.3, 21.0$

IR (neat): 498, 577, 611, 698, 744, 833, 914, 968, 1032, 1227, 1373, 1451, 1496, 1600, 1741, 1959, 2952, 3033

### 11. 4-Nitrobenzyl acetate

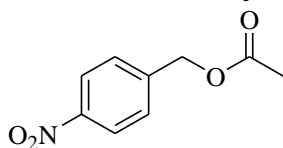

$^1\text{H}$  NMR (250 MHz;  $\text{CDCl}_3$ ):  $\delta_{\text{H}} = 8.22$  (d,  $J = 8.8$  Hz, 2H), 7.51 (d,  $J = 8.8$  Hz, 2H), 5.18 (s, 2H), 2.13 (s, 3H);  $^{13}\text{C}$  NMR (62.9 MHz,  $\text{CDCl}_3$ ):  $\delta_{\text{C}} = 170.5, 147.6, 143.2, 128.3, 123.7, 64.7, 20.8$

IR (neat): 463, 529, 605, 666, 740, 841, 919, 1045, 1106, 1237, 1343, 1447, 1517, 1602, 17435, 1950, 2939, 3080

### 12. Phenethyl acetate

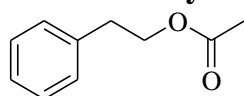

$^1\text{H}$  NMR (400 MHz;  $\text{CDCl}_3$ ):  $\delta_{\text{H}} = 7.25\text{--}7.37$  (m, 5H), 4.32 (t,  $J = 7.2$  Hz, 2H), 2.98 (t,  $J = 7.2$  Hz, 2H), 2.07 (s, 3H);  $^{13}\text{C}$  NMR (100.6 MHz,  $\text{CDCl}_3$ ):  $\delta_{\text{C}} = 171.0, 137.8, 128.9, 128.5, 126.6, 64.9, 35.1, 21.0$

IR (neat): 494, 572, 604, 643, 699, 746, 814, 906, 981, 1037, 1240, 1373, 1451, 1492, 1601, 1738, 2956, 3028, 3063

### 13. 3-Phenylpropyl acetate

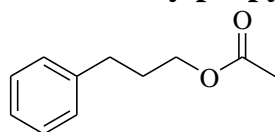

$^1\text{H}$  NMR (250 MHz;  $\text{CDCl}_3$ ):  $\delta_{\text{H}} = 7.17\text{--}7.31$  (m, 5H), 4.08 (t,  $J = 6.5$  Hz, 2H), 2.69 (t,  $J = 7.2$  Hz, 2H), 2.05 (s, 3H), 1.93 (quin,  $J = 6.8$  Hz, 2H);  $^{13}\text{C}$  NMR (62.9 MHz,  $\text{CDCl}_3$ ):  $\delta_{\text{C}} = 171.1, 141.2, 128.4, 128.3, 126.0, 63.8, 32.1, 30.1, 20.9$

IR (neat): 476, 605, 701, 745, 887, 953, 1040, 1241, 1371, 1451, 1493, 1601, 1739, 1878, 1949, 2118, 2948, 3026

### 14. Octan-2-yl acetate

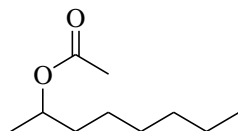

$^1\text{H}$  NMR (400 MHz;  $\text{CDCl}_3$ ):  $\delta_{\text{H}} = 4.87\text{--}4.95$  (m, 1H), 2.05 (s, 3H), 1.28-1.62 (m, 10H), 1.23 (d,  $J = 6.0$  Hz, 3H), 0.90 (t,  $J = 6.8$  Hz, 3H);  $^{13}\text{C}$  NMR (100.6 MHz,  $\text{CDCl}_3$ ):  $\delta_{\text{C}} = 170.8, 71.0, 35.9, 31.7, 29.1, 25.3, 22.5, 21.4, 19.9, 14.0$

IR (neat): 614, 725, 806, 952, 1026, 1122, 1246, 1373, 1457, 1737, 2929

### 15. Cyclohexyl acetate

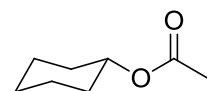

$^1\text{H}$  NMR (250 MHz;  $\text{CDCl}_3$ ):  $\delta_{\text{H}}= 4.65\text{-}4.75$  (m, 1H), 2.00 (s, 3H), 1.2-1.9 (m, 10H);  $^{13}\text{C}$  NMR (62.9 MHz,  $\text{CDCl}_3$ ):  $\delta_{\text{C}}= 170.5, 72.6, 31.6, 25.3, 23.7, 21.4$

### 16. Cycloheptyl acetate

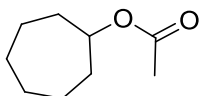

$^1\text{H}$  NMR (250 MHz;  $\text{CDCl}_3$ ):  $\delta_{\text{H}}= 4.85\text{-}4.95$  (m, 1H), 2.01 (s, 3H), 1.44-1.93 (m, 12H)  
IR (neat): 456, 609, 728, 826, 875, 970, 1022, 1246, 1370, 1456, 1736, 2683, 2926

### 17. Cyclooctyl acetate

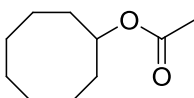

$^1\text{H}$  NMR (400 MHz;  $\text{CDCl}_3$ ):  $\delta_{\text{H}}= 4.90\text{-}4.96$  (m, 1H), 2.01 (s, 3H), 1.63-1.85 (m, 6H), 1.50-1.63 (m, 8H);  $^{13}\text{C}$  NMR (100.6 MHz,  $\text{CDCl}_3$ ):  $\delta_{\text{C}}= 170.4, 75.0, 31.4, 27.0, 25.3, 22.9$   
IR (neat): 456, 608, 735, 806, 865, 955, 1035, 1097, 1248, 1370, 1456, 1732, 2696, 2925

### 18. 1-Cyclohexylethyl acetate

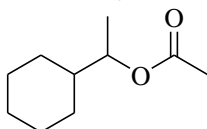

$^1\text{H}$  NMR (400 MHz;  $\text{CDCl}_3$ ):  $\delta_{\text{H}}= 4.70\text{-}4.77$  (quin,  $J= 6.4$  Hz, 1H), 2.05 (s, 3H), 0.88-1.78 (m, 14H);  $^{13}\text{C}$  NMR (100.6 MHz,  $\text{CDCl}_3$ ):  $\delta_{\text{C}}= 170.8, 74.6, 42.5, 28.5, 26.3, 26.0, 25.9, 21.3, 17.0, 14.1$   
IR (neat): 461, 547, 608, 805, 840, 886, 949, 1047, 1131, 1246, 1373, 1449, 1736, 2930

### 19. 2-Isopropyl-5-methylcyclohexyl acetate

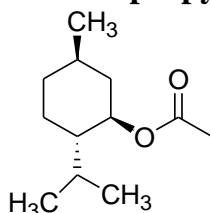

$^1\text{H}$  NMR (400 MHz;  $\text{CDCl}_3$ ):  $\delta_{\text{H}}= 4.66\text{-}4.73$  (td,  $J_1= 4.4$  Hz,  $J_2= 10.8$  Hz, 1H), 2.06 (s, 3H), 0.94-2.03 (m, 9H), 0.93 (d,  $J= 2.4$  Hz, 3H), 0.91 (d,  $J= 2.4$  Hz, 3H), 0.78 (d,  $J= 7.2$  Hz, 3H);  $^{13}\text{C}$  NMR (100.6 MHz,  $\text{CDCl}_3$ ):  $\delta_{\text{C}}= 170.7, 74.1, 47.0, 40.9, 34.2, 31.3, 26.3, 23.4, 22.0, 21.3, 20.7, 16.3$   
IR (neat): 473, 607, 651, 806, 838, 907, 975, 1026, 1092, 1186, 1244, 1373, 1456, 1735, 2953



## 20. Adamantan-1-yl acetate

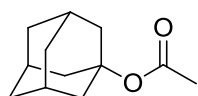

$^1\text{H}$  NMR (400 MHz;  $\text{CDCl}_3$ ):  $\delta_{\text{H}} = 2.16$  (s, 3H), 2.11 (d,  $J = 7.6$  Hz, 6H), 1.97 (s, 3H), 1.60-1.70 (brs, 6H);  $^{13}\text{C}$  NMR (100.6 MHz,  $\text{CDCl}_3$ ):  $\delta_{\text{C}} = 170.2, 80.2, 41.2, 36.2, 30.7, 22.7$

IR (neat): 455, 542, 605, 675, 729, 809, 864, 950, 1016, 1058, 1102, 1240, 1363, 1448, 1732, 2669, 2913

## 21. 2-Adamantanyl acetate

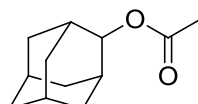

$^1\text{H}$  NMR (250 MHz;  $\text{CDCl}_3$ ):  $\delta_{\text{H}} = 4.88$  (s, 1H), 1.50-2.04 (m, 17H);  $^{13}\text{C}$  NMR (62.9 MHz,  $\text{CDCl}_3$ ):  $\delta_{\text{C}} = 170.5, 77.0, 37.3, 36.3, 31.8, 31.7, 27.2, 26.9, 21.4$

IR (neat): 442, 531, 612, 672, 810, 901, 979, 1031, 1095, 1245, 1367, 1445, 1733, 2672, 2912

## 22. 3-Hydroxybutyl acetate compound with 4-hydroxybutan-2-yl acetate (2.5:1)

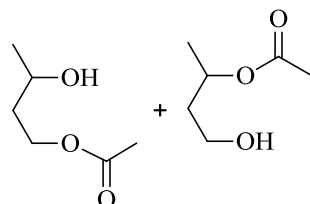

$^1\text{H}$  NMR (400 MHz;  $\text{CDCl}_3$ ):  $\delta_{\text{H}} = 5.09$ -5.17 (m, 0.4H), 4.32-4.38 (m, 1H), 4.11-4.17 (m, 1H), 3.87-3.95 (m, 1H), 3.58-3.70 (m, 0.8H), 2.08 (s, 4H), 2.02 (brs, 1OH), 1.68-1.87 (m, 2H), 1.30 (d,  $J = 6.40$  Hz, 1H), 1.25 (d,  $J = 6.40$  Hz, 3H);  $^{13}\text{C}$  NMR (100.6 MHz,  $\text{CDCl}_3$ ):  $\delta_{\text{C}} = 171.5, 68.2, 64.8, 61.7, 58.7, 39.0, 38.0, 23.4, 21.3, 21.0, 20.4$

IR (neat): 424, 538, 609, 782, 838, 911, 976, 1048, 1097, 1133, 1261, 1375, 1736, 2970, 3500-3700 (broad)

## 23. Butane-1,3-diyl diacetate

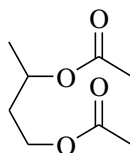

$^1\text{H}$  NMR (400 MHz;  $\text{CDCl}_3$ ):  $\delta_{\text{H}} = 5.00$ -5.05 (m, 1H), 4.14 (t,  $J = 6.4$  Hz, 2H), 2.06 (s, 3H), 2.05 (s, 3H), 1.85-1.95 (m, 2H), 1.28 (d,  $J = 6.4$  Hz, 3H);  $^{13}\text{C}$  NMR (100.6 MHz,  $\text{CDCl}_3$ ):  $\delta_{\text{C}} = 171.0, 170.6, 67.8, 60.8, 34.7, 21.2, 20.9, 20.0$

24. 3-Hydroxybutyl dodecanoate compound with 4-hydroxybutan-2-yl dodecanoate (2.5:1)

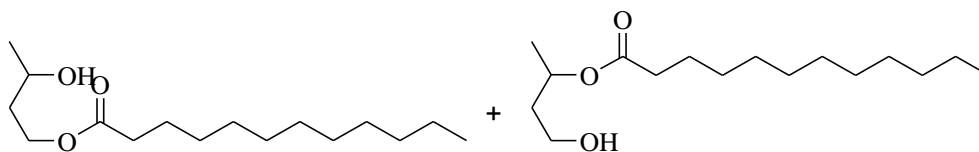

$^1\text{H}$  NMR (250 MHz;  $\text{CDCl}_3$ ):  $\delta_{\text{H}} = 5.08\text{--}5.16$  (m, 0.4H), 4.32-4.40 (m, 1H), 4.06-4.15 (m, 1H), 3.82-3.90 (m, 1H), 3.50-3.64 (m, 0.8H), 2.30 (t,  $J = 7.5$  Hz, 3H), 2.00 (brs, 1OH), 1.58-1.82 (m, 7H), 1.28 (brs, 22H), 0.87 (t,  $J = 6.2$  Hz, 3H);  $^{13}\text{C}$  NMR (100.6 MHz,  $\text{CDCl}_3$ ):  $\delta_{\text{C}} = 174.4$ , 174.3, 67.9, 64.8, 61.5, 58.7, 39.1, 38.0, 34.6, 34.3, 31.9, 29.5, 29.4, 29.3, 29.2, 29.1, 25.0, 24.9, 23.4, 22.6, 20.4, 14.1

IR (neat): 456, 604, 733, 984, 1182, 1373, 1459, 1729, 2925, 3442

25. Butane-1,3-diyl didodecanoate:

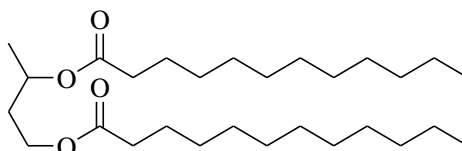

$^1\text{H}$  NMR (250 MHz;  $\text{CDCl}_3$ ):  $\delta_{\text{H}} = 4.95\text{--}5.05$  (m, 1H), 4.08 (t,  $J = 6.50$  Hz, 2H), 2.22-2.29 (m, 4H), 1.80-1.90 (m, 2H), 1.55-1.65 (m, 4H), 1.24 (brs, 35H), 0.86 (t,  $J = 6.2$  Hz, 6H);  $^{13}\text{C}$  NMR (62.9 MHz,  $\text{CDCl}_3$ ):  $\delta_{\text{C}} = 173.8$ , 173.3, 67.5, 60.5, 34.8, 34.5, 34.2, 31.8, 29.5, 29.3, 29.2, 29.1, 24.9, 24.9, 22.6, 20.0, 14.0

IR (neat): 455, 604, 721, 1111, 1174, 1372, 1459, 1459, 1737, 2925

26. 3-Hydroxybutyl stearate compound with 4-hydroxybutan-2-yl stearate (2.5:1)

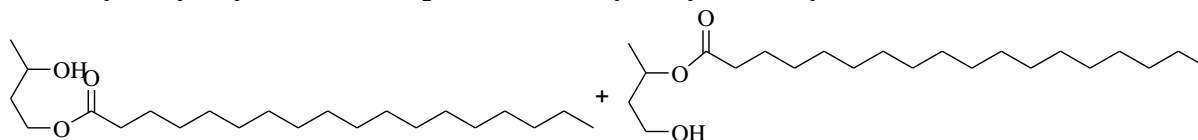

$^1\text{H}$  NMR (400 MHz;  $\text{CDCl}_3$ ):  $\delta_{\text{H}} = 5.11\text{--}5.19$  (m, 0.4H), 4.35-4.41 (m, 1H), 4.11-4.17 (m, 1H), 3.86-3.94 (m, 1H), 3.65-3.70 (m, 0.4H), 3.56-3.62 (m, 0.4H), 2.60 (brs, 1 OH), 2.33 (t,  $J = 7.6$  Hz, 3H), 1.60-1.86 (m, 6H), 1.29 (brs, 46H), 0.90 (t,  $J = 6.4$  Hz, 4H);  $^{13}\text{C}$  NMR (100.6 MHz,  $\text{CDCl}_3$ ):  $\delta_{\text{C}} = 174.4$ , 174.3, 67.8, 64.9, 61.5, 58.7, 39.1, 38.1, 34.6, 34.3, 31.7, 31.9, 29.7, 29.6, 29.6, 29.4, 29.3, 29.2, 29.1, 29.1, 25.0, 24.9, 24.7, 14.0

IR (neat): 456, 606, 723, 1050, 1103, 1176, 1264, 1378, 1463, 1731, 2918, 3427

27. Butane-1,3-diyl distearate

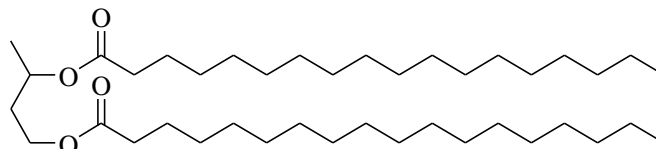

$^1\text{H}$  NMR (400 MHz;  $\text{CDCl}_3$ ):  $\delta_{\text{H}} = 4.99\text{--}5.08$  (m, 1H), 4.13 (brs, 2H), 2.30 (t,  $J = 7.2$ , 4H), 1.85-1.95 (m, 2H), 1.63 (brs, 4H), 1.28 (brs, 62H), 0.91 (t,  $J = 6.0$  Hz, 6H);  $^{13}\text{C}$  NMR (100.6 MHz,  $\text{CDCl}_3$ ):  $\delta_{\text{C}} = 173.8$ , 173.4, 67.6, 60.6, 34.8, 34.6, 34.3, 33.6, 31.9, 29.7, 29.6, 29.6, 29.5, 29.4, 29.3, 29.3, 29.1, 29.0, 25.0, 24.9, 24.6, 14.0

IR (neat): 457, 607, 653, 719, 800, 872, 1097, 1167, 1259, 1462, 1735, 2357, 2918

1-11.  $^1\text{H}$ ,  $^{13}\text{C}$ NMR, and FT-IR spectra

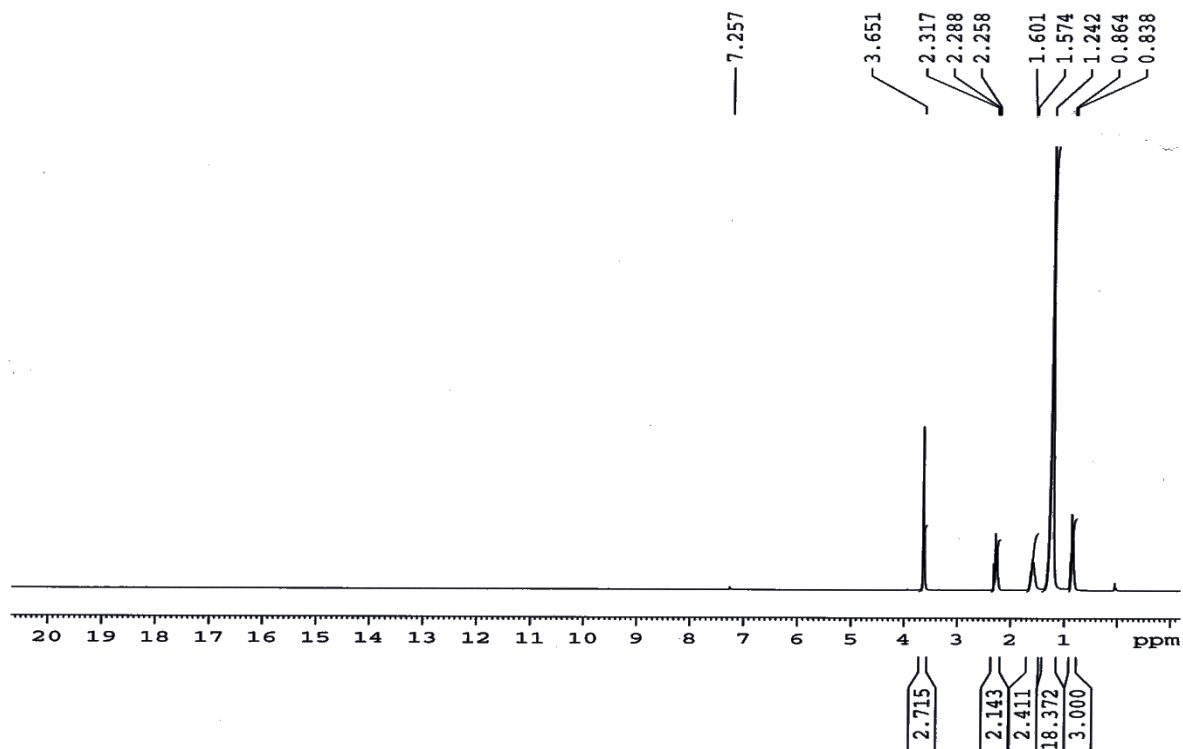

Fig. S16.  $^1\text{H}$ NMR of Methyl Laurate in  $\text{CDCl}_3$

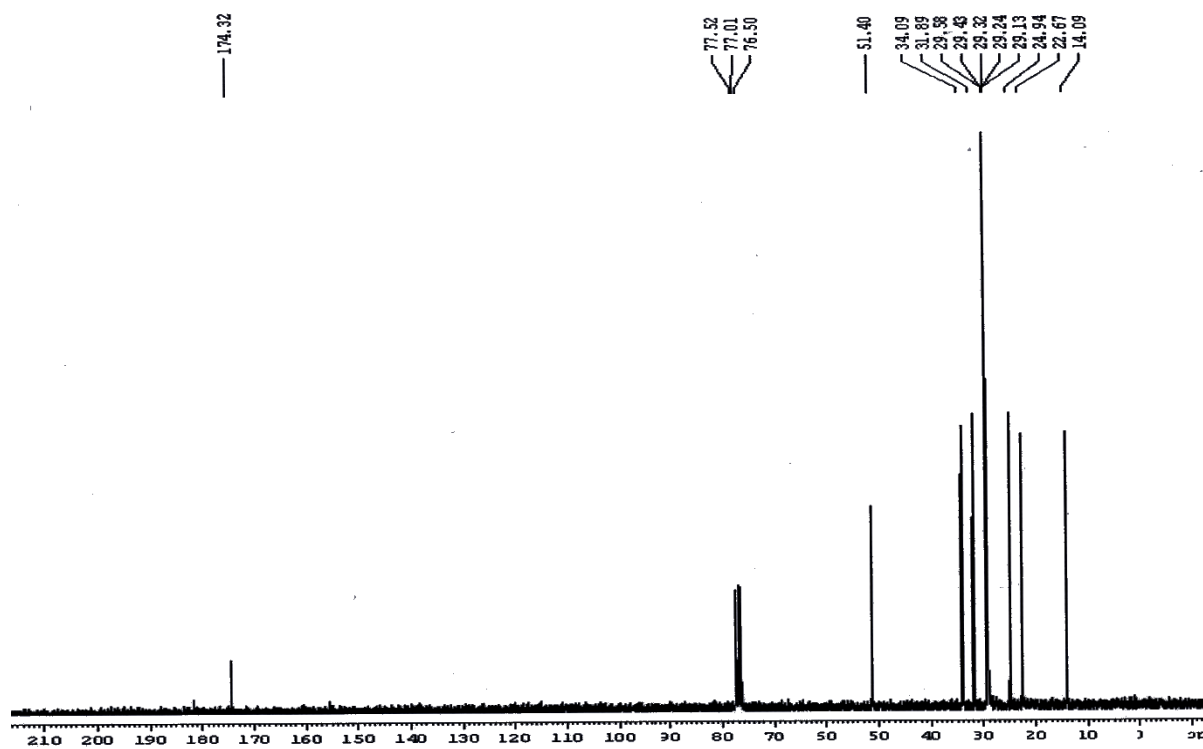

Fig. S17.  $^{13}\text{C}$ NMR of Methyl Laurate in  $\text{CDCl}_3$

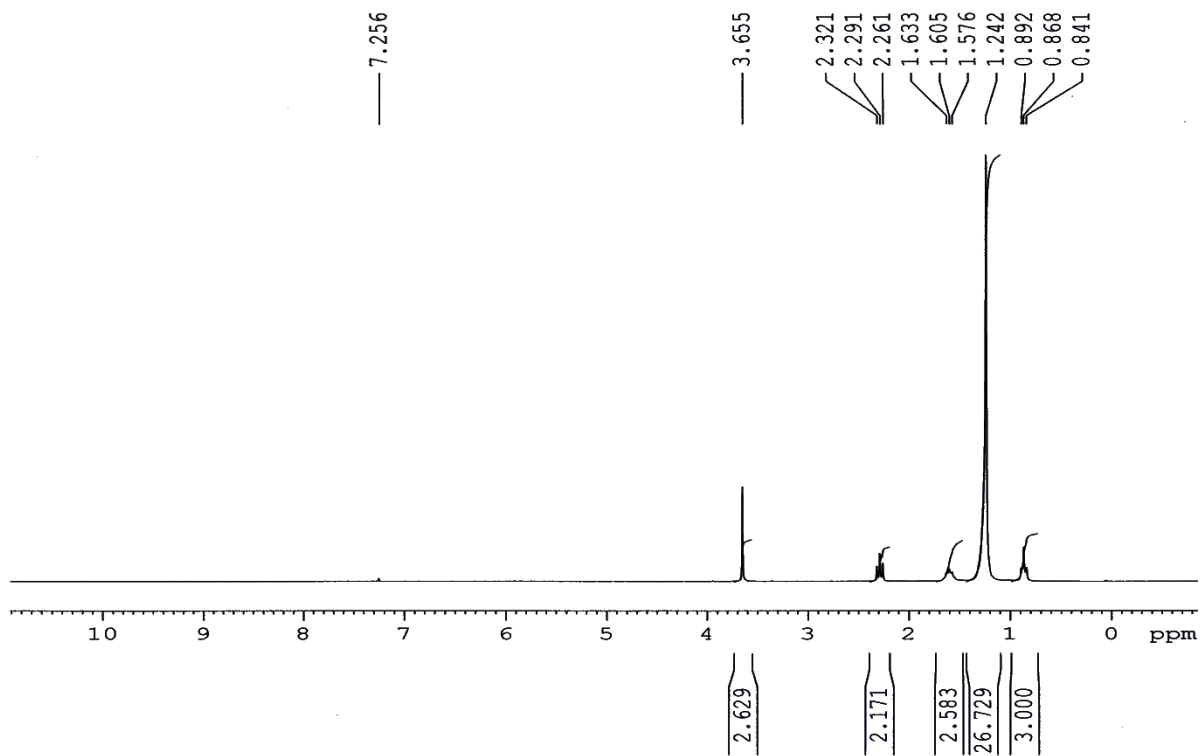

**Fig. S18.**  $^1\text{H}$ NMR of Methyl Palmitate in  $\text{CDCl}_3$

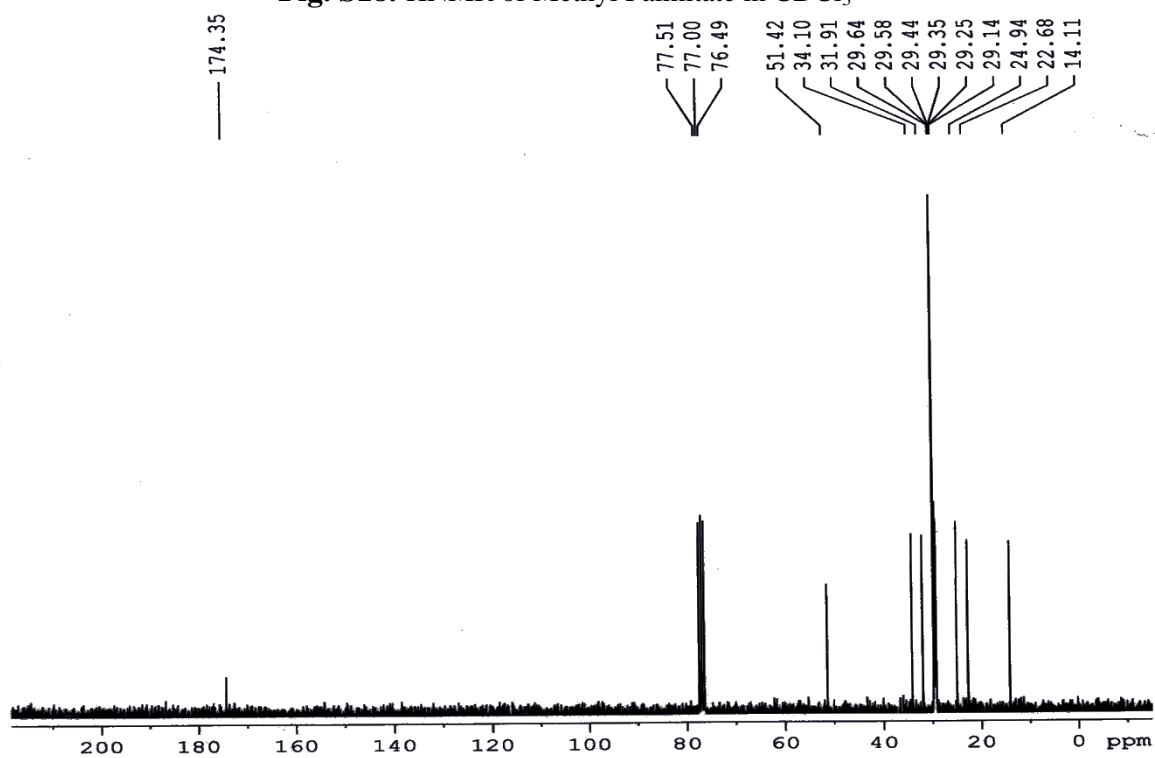

**Fig. S19.**  $^{13}\text{C}$ NMR of Methyl Palmitate in  $\text{CDCl}_3$

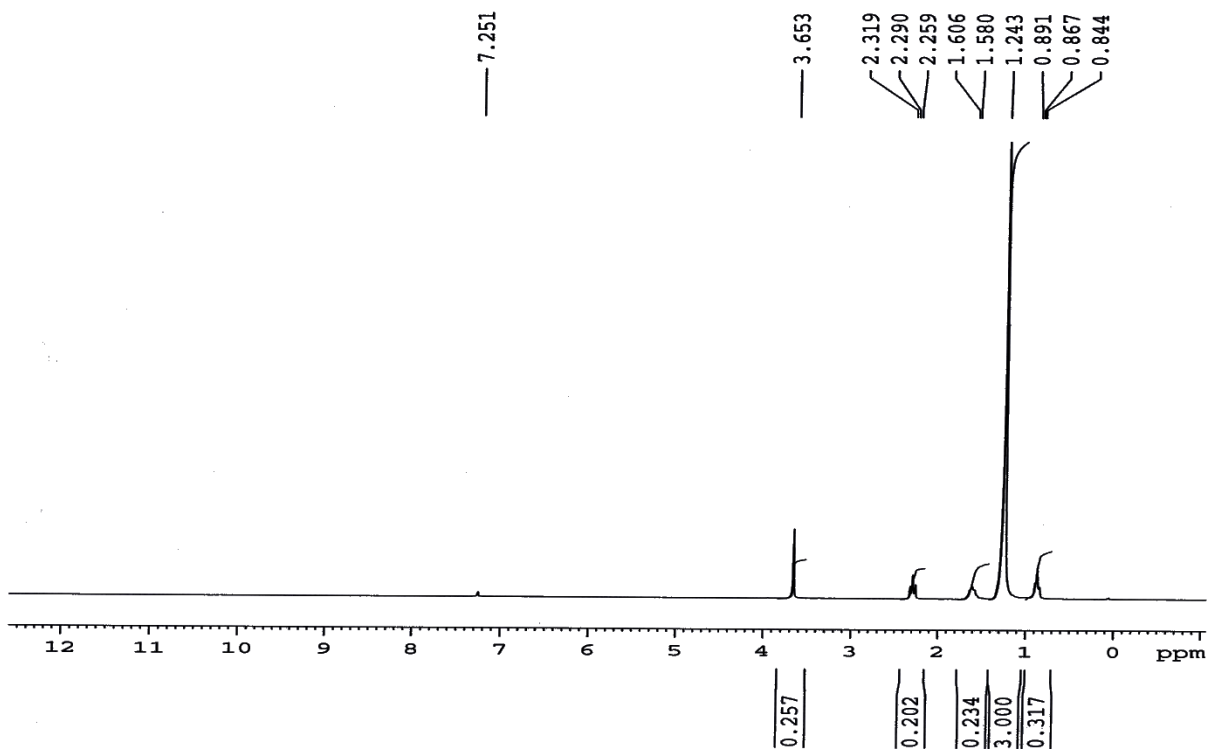

**Fig. S20.**  $^1\text{H}$ NMR of Methyl Stearate in  $\text{CDCl}_3$

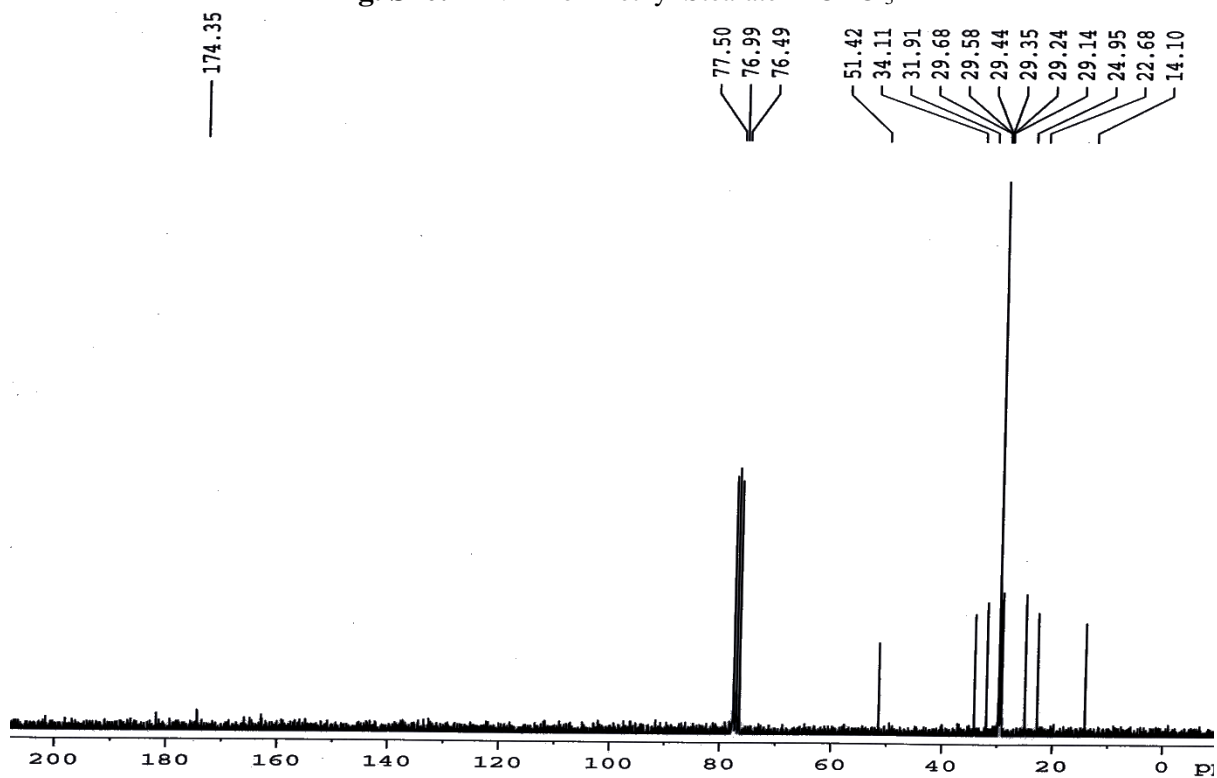

**Fig. S21.**  $^{13}\text{C}$ NMR of Methyl Stearate in  $\text{CDCl}_3$

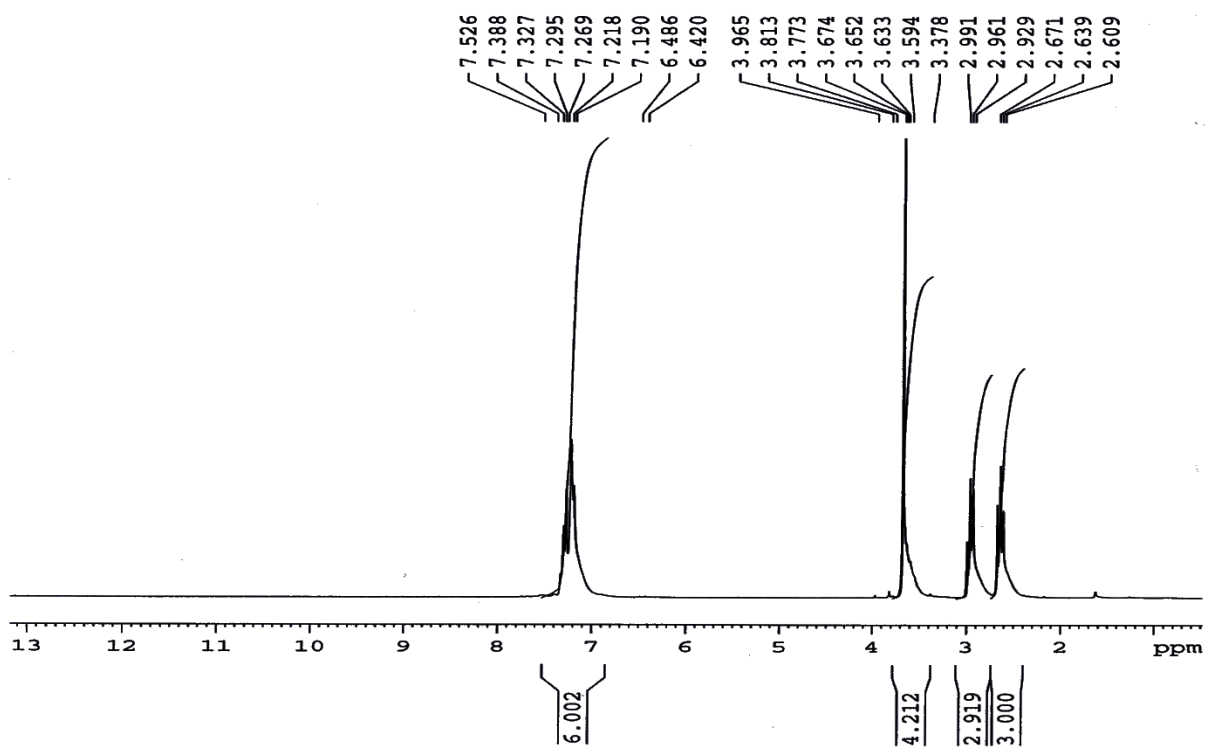

**Fig. S22.**  $^1\text{H}$ NMR of 3-phenylpropanoate in  $\text{CDCl}_3$

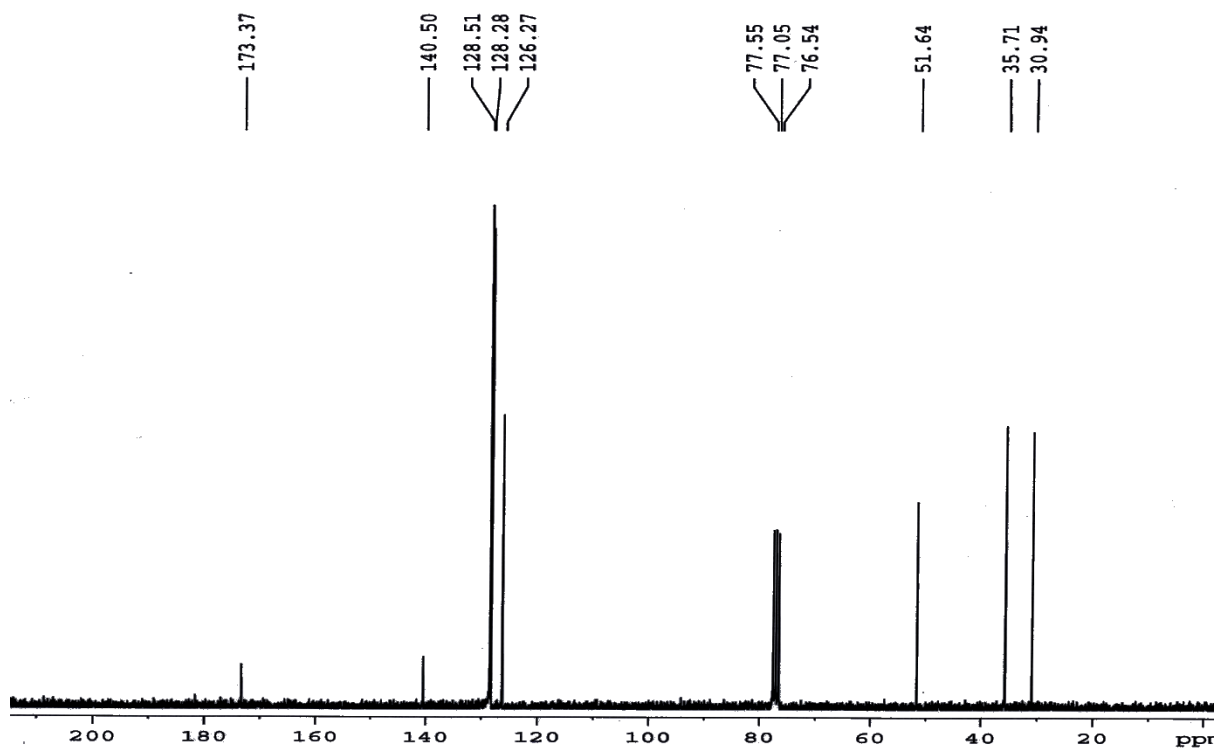

**Fig. S23.**  $^{13}\text{C}$ NMR of 3-phenylpropanoate in  $\text{CDCl}_3$

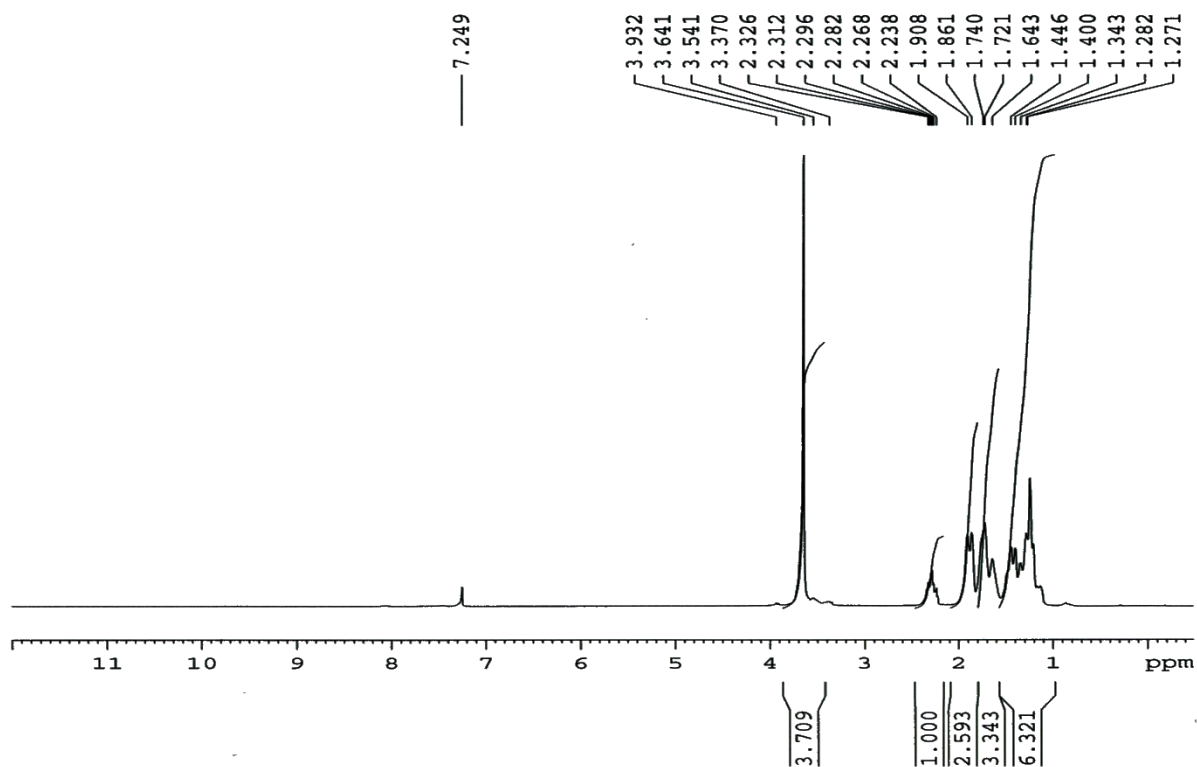

**Fig. S24.**  $^1\text{H}$ NMR of methylhexanoate in  $\text{CDCl}_3$

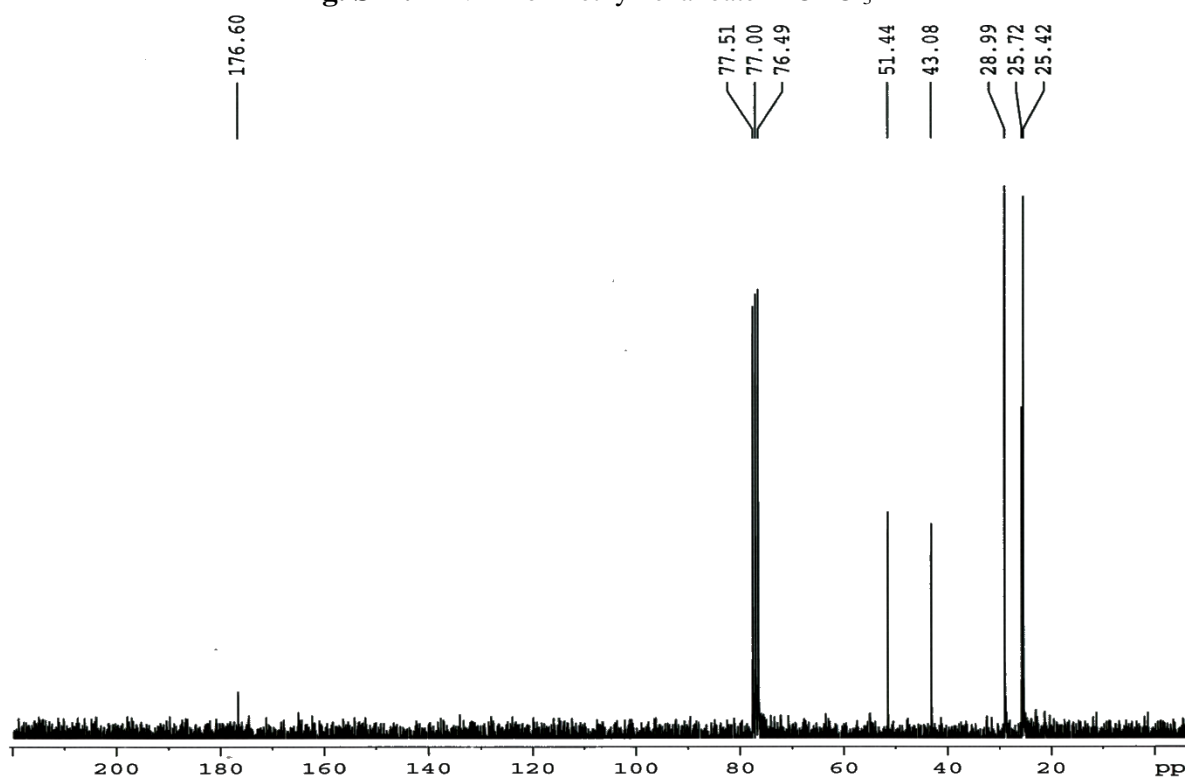

**Fig. S25.**  $^{13}\text{C}$ NMR of methylhexanoate in  $\text{CDCl}_3$

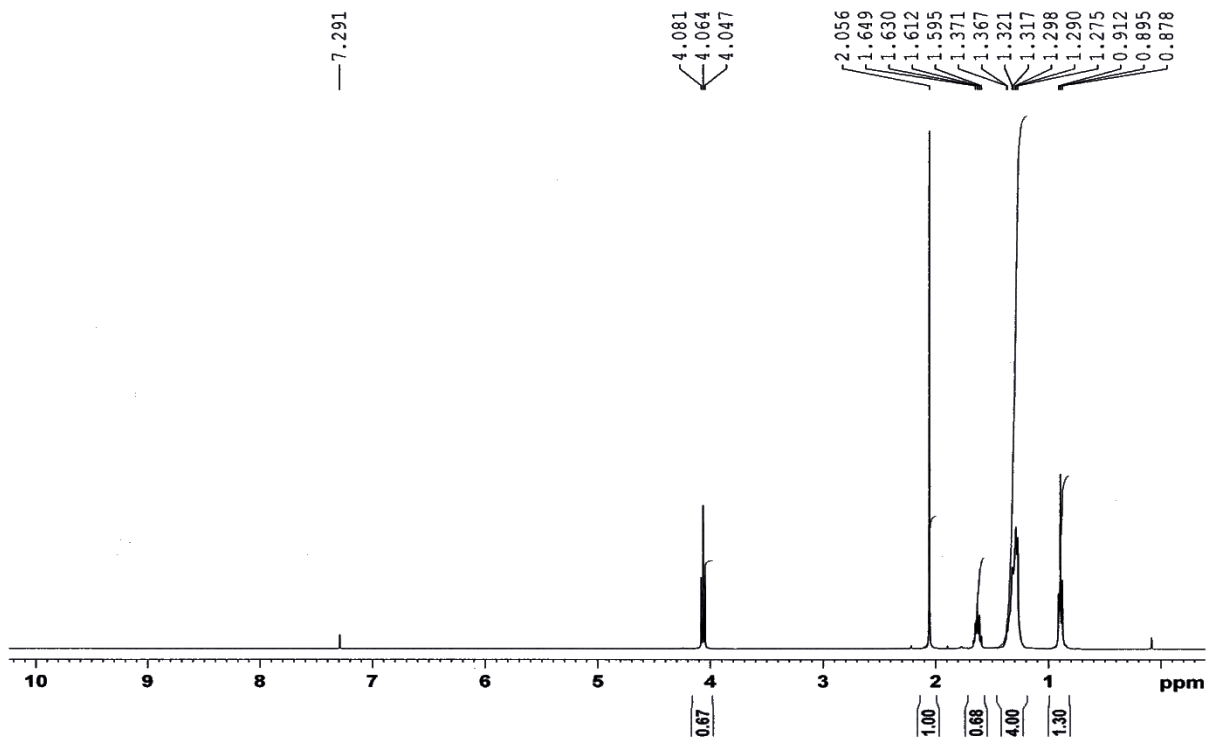

Fig. S26.  $^1\text{H}$ NMR of octylacetate in  $\text{CDCl}_3$

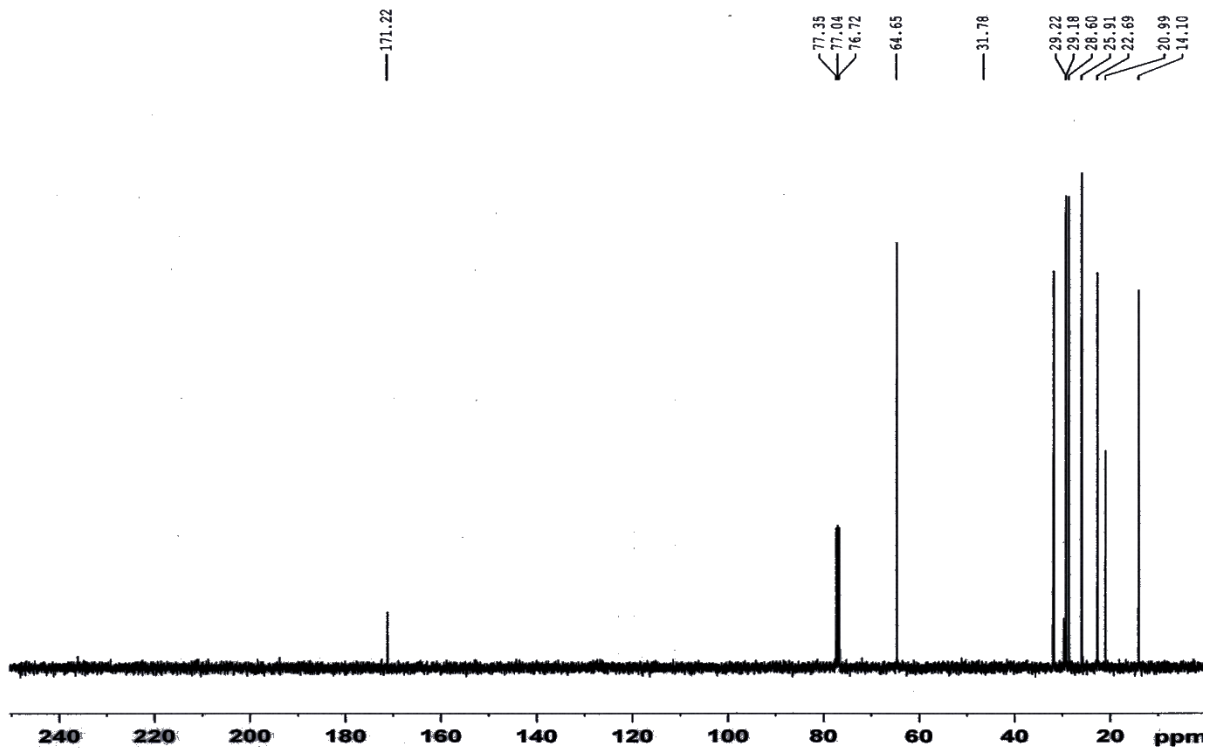

Fig. S27.  $^{13}\text{C}$ NMR of octylacetate in  $\text{CDCl}_3$



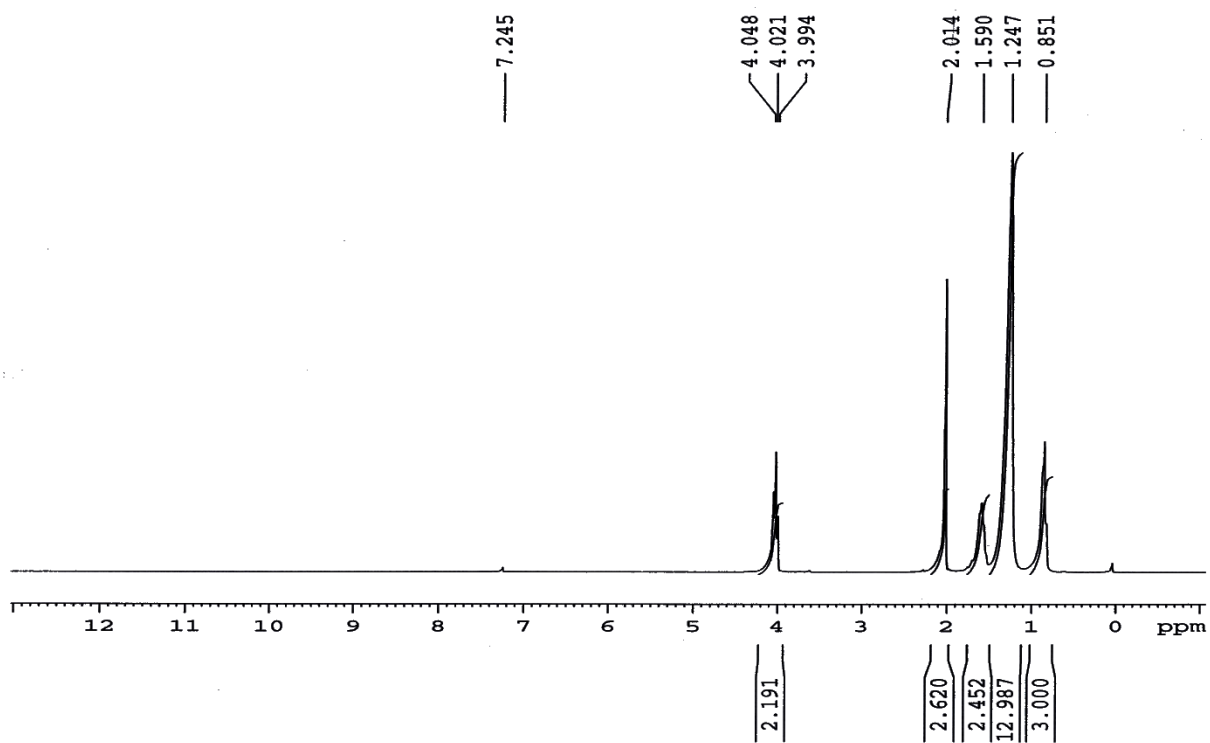

Fig. S28.  $^1\text{H}$ NMR of nonylacetate in  $\text{CDCl}_3$

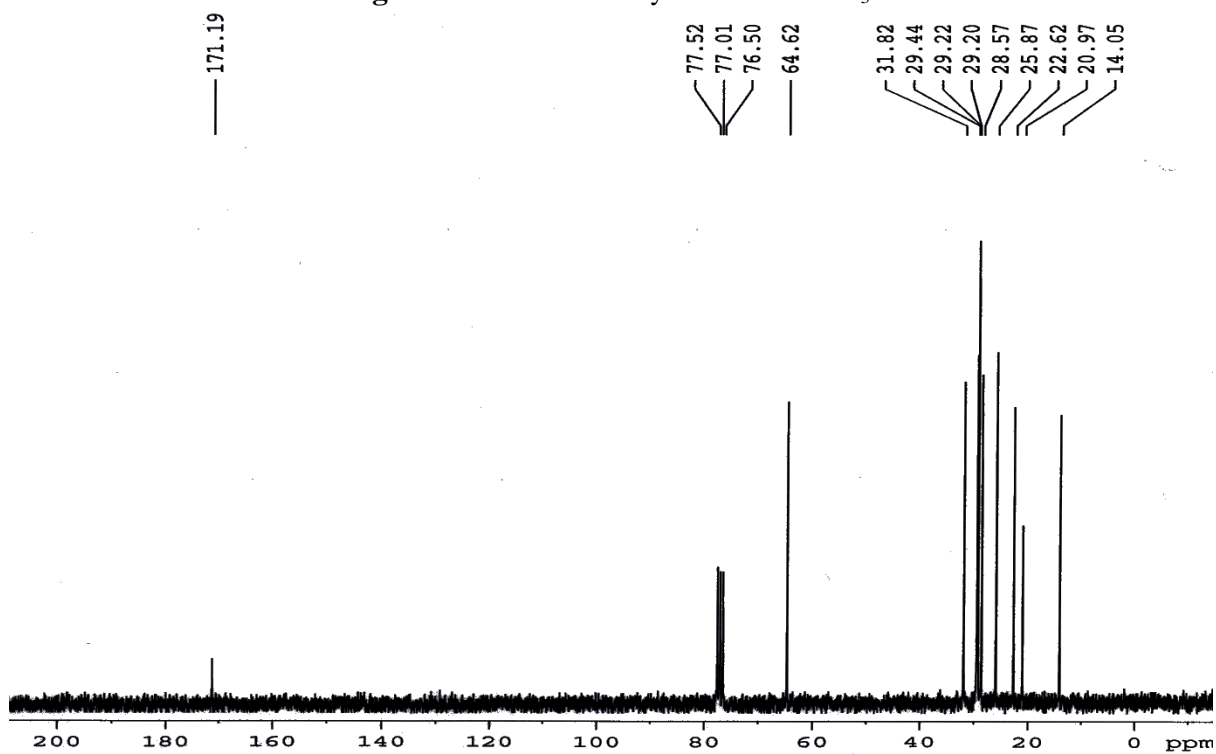

Fig. S29.  $^{13}\text{C}$ NMR of nonylacetate in  $\text{CDCl}_3$

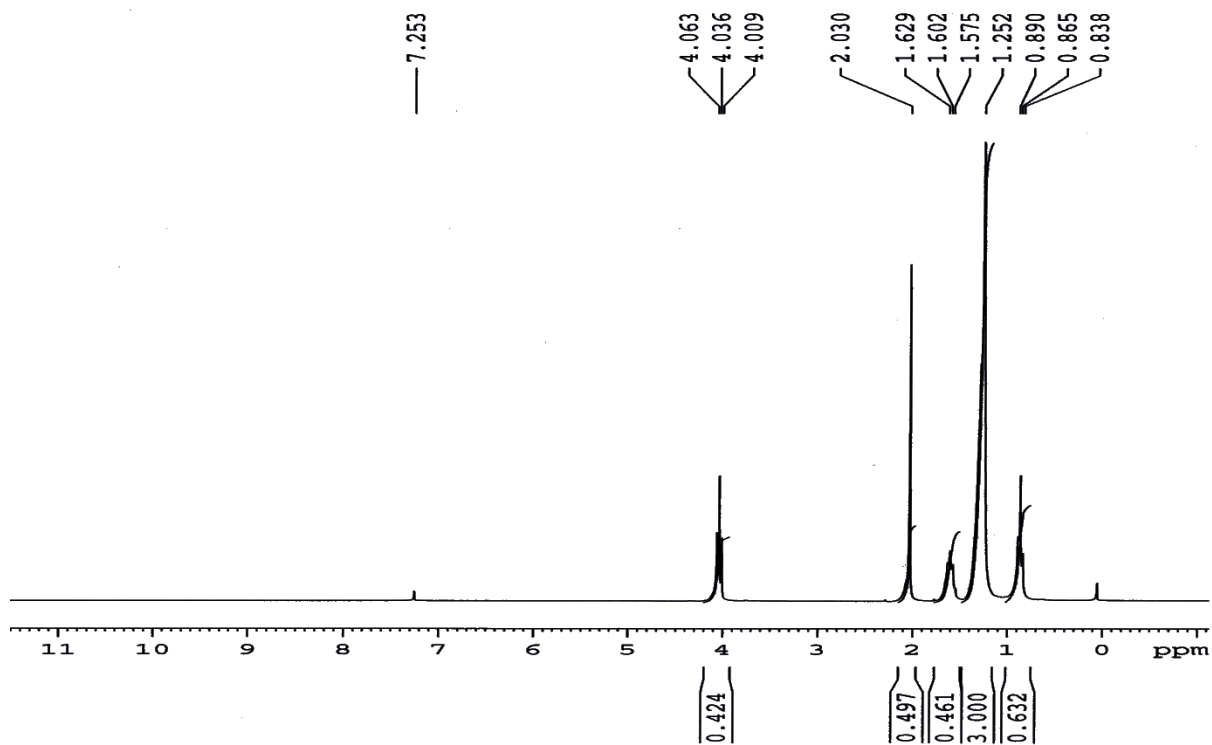

Fig. S30.  $^1\text{H}$ NMR of decylacetate in  $\text{CDCl}_3$

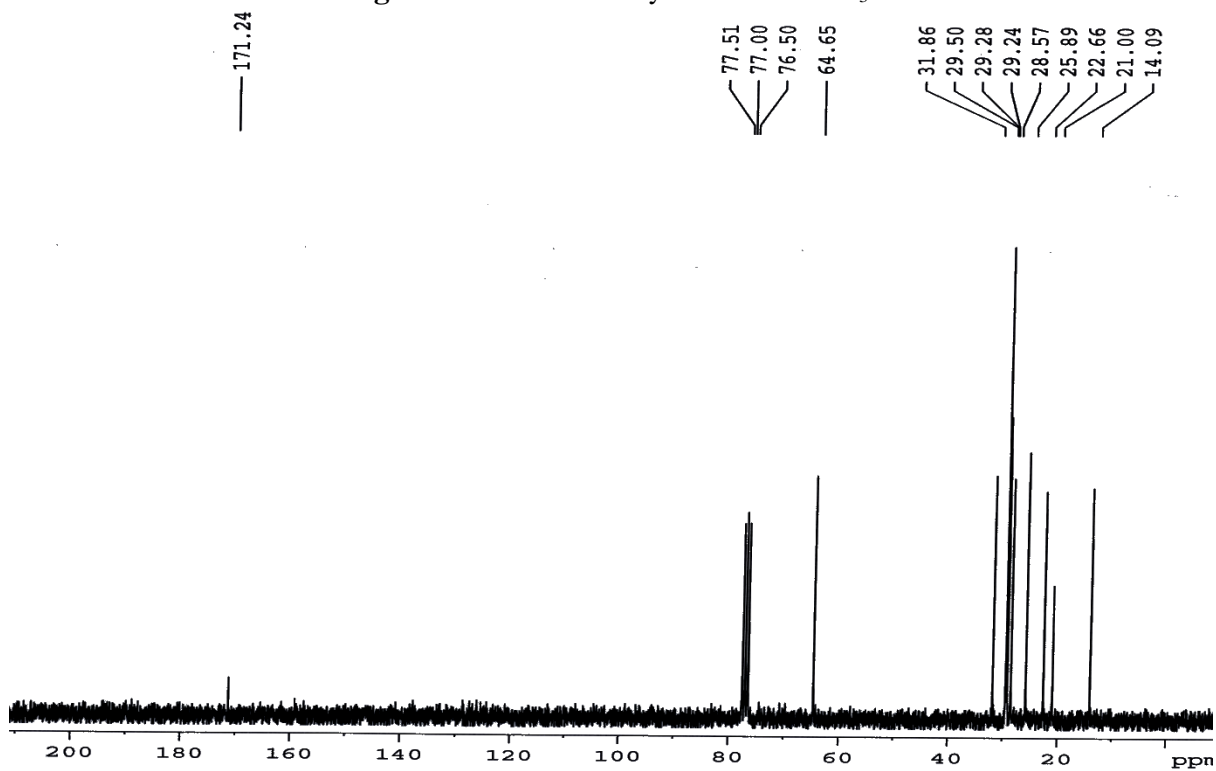

Fig. S31.  $^{13}\text{C}$ NMR of decylacetate in  $\text{CDCl}_3$

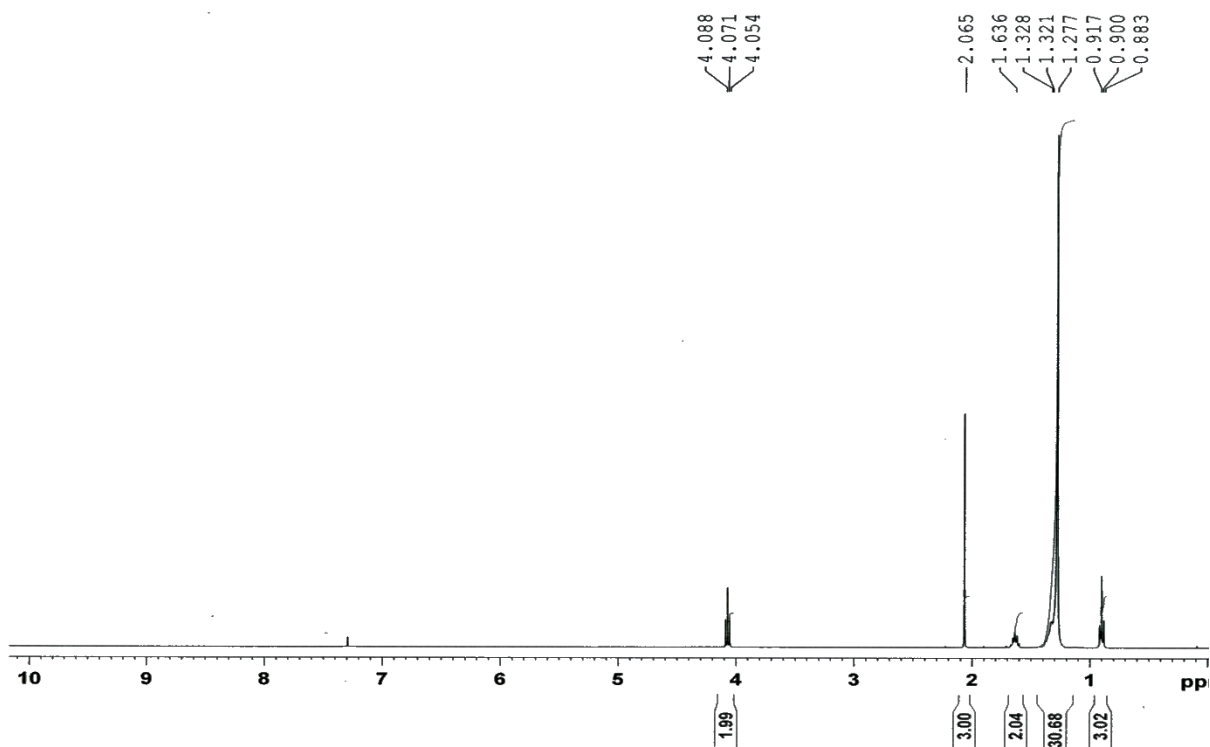

**Fig. S32.**  $^1\text{H}$ NMR of octadecylacetate in  $\text{CDCl}_3$

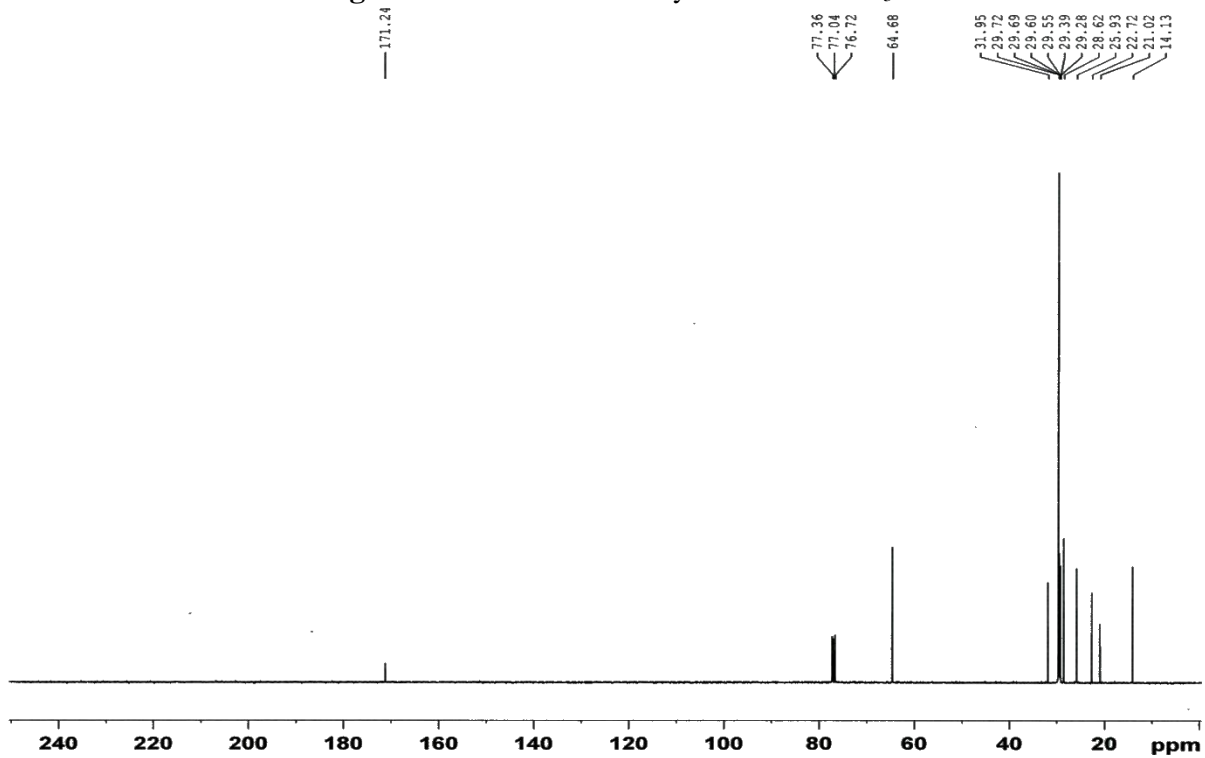

**Fig. S33.**  $^{13}\text{C}$ NMR of octadecylacetate in  $\text{CDCl}_3$

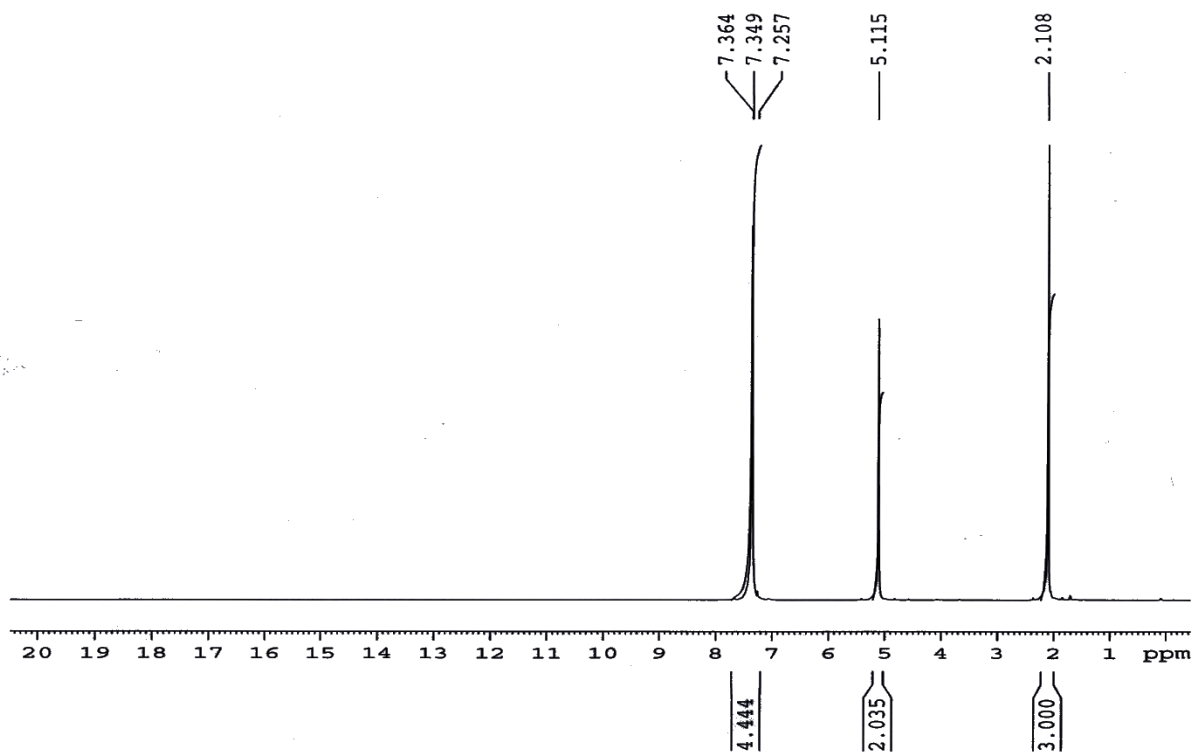

Fig. S34.  $^1\text{H}$ NMR of benzylacetate in  $\text{CDCl}_3$

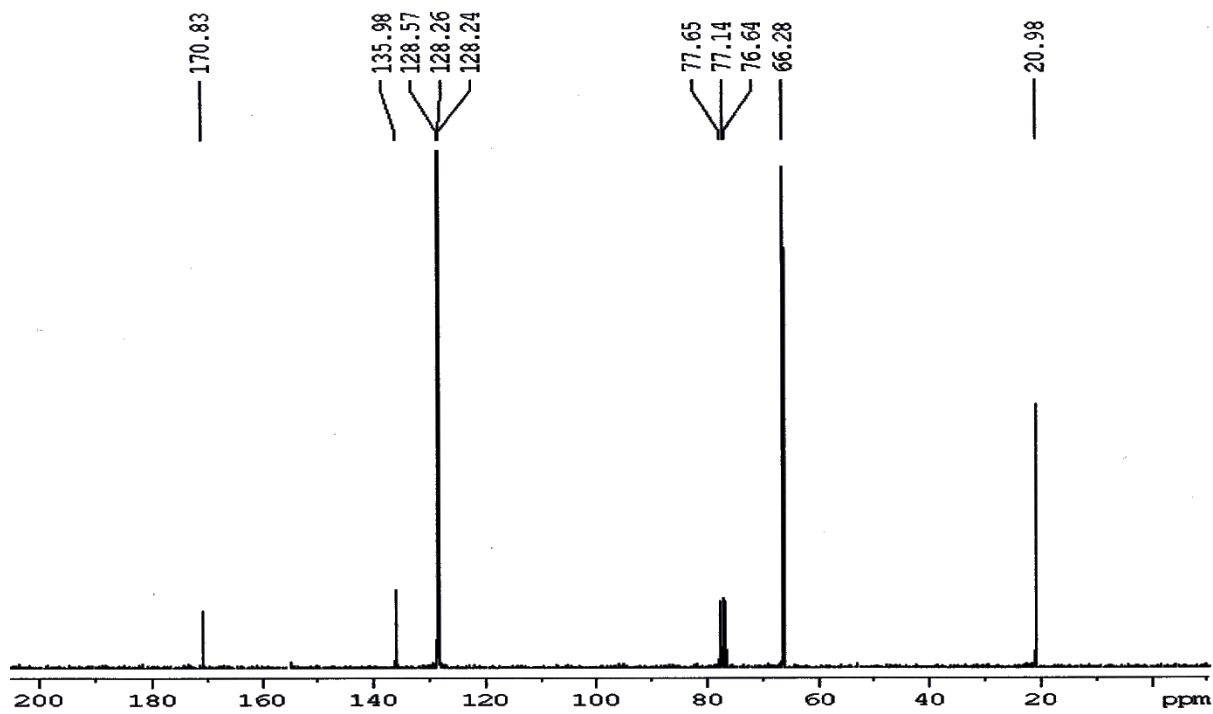

Fig. S35.  $^{13}\text{C}$ NMR of benzylacetate in  $\text{CDCl}_3$

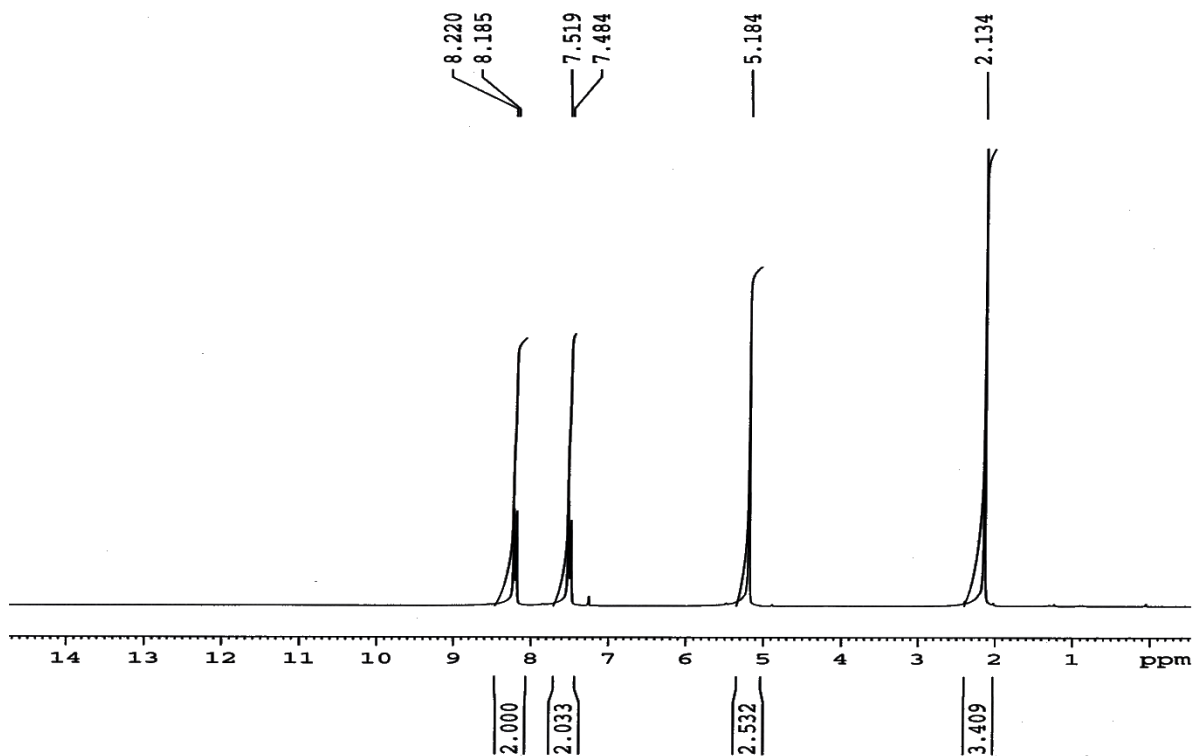

Fig. S36.  $^1\text{H}$ NMR of 4-nitrobenzylacetate in  $\text{CDCl}_3$

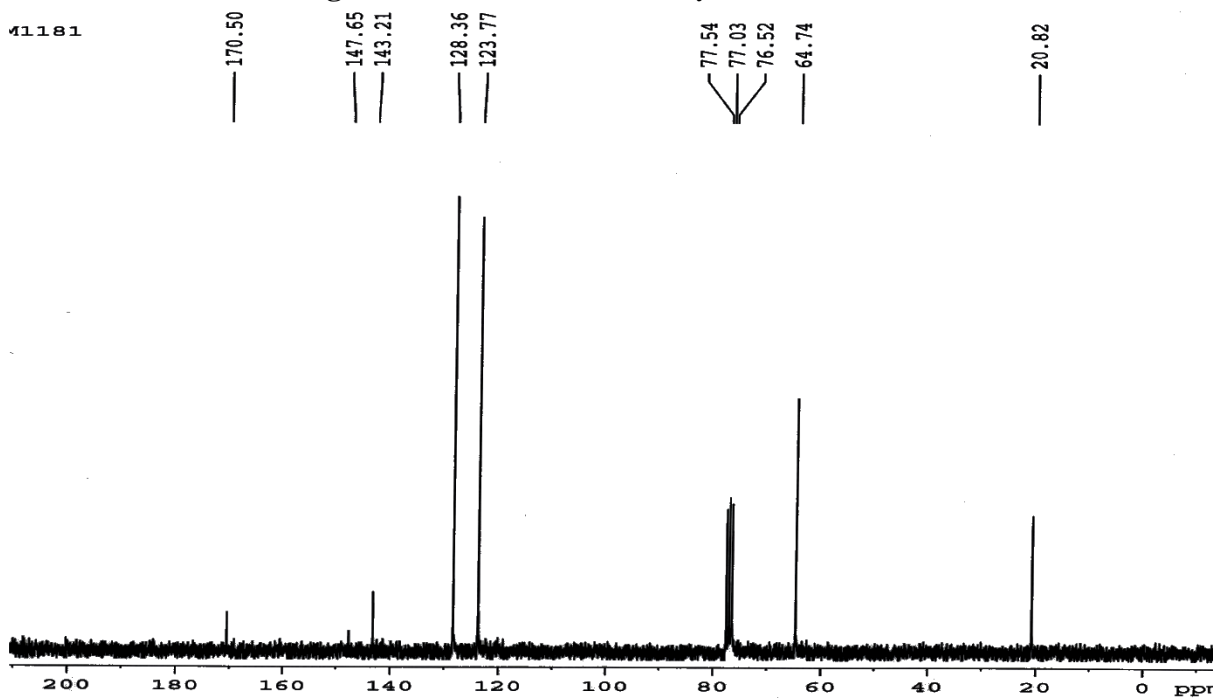

Fig. S37.  $^{13}\text{C}$ NMR of 4-nitrobenzylacetate in  $\text{CDCl}_3$

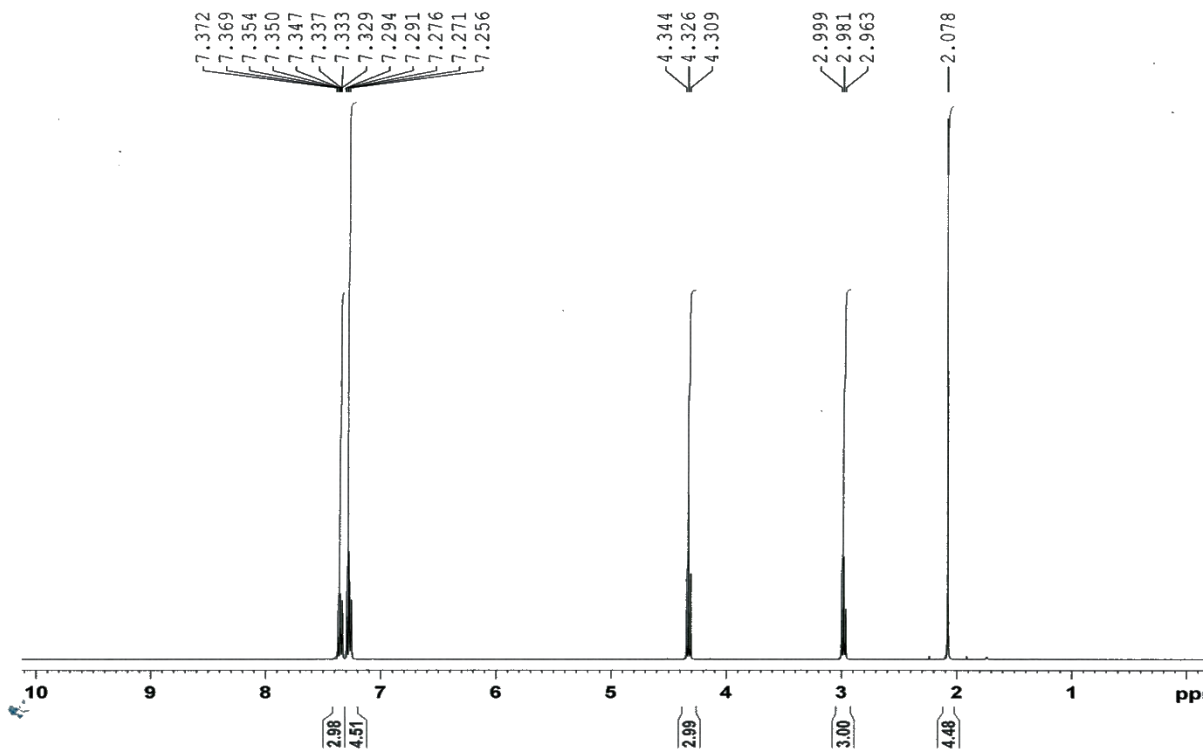

Fig. S38.  $^1\text{H}$ NMR of phenylacetate in  $\text{CDCl}_3$

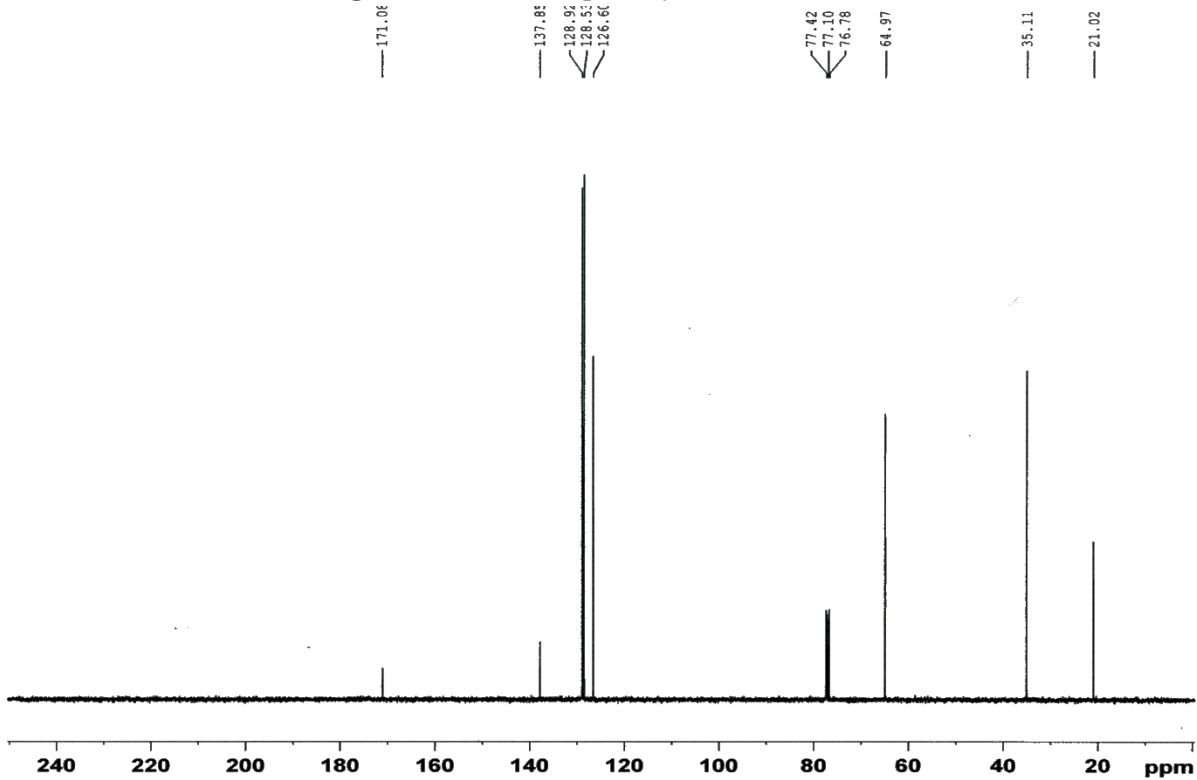

Fig. S39.  $^{13}\text{C}$ NMR of phenylacetate in  $\text{CDCl}_3$

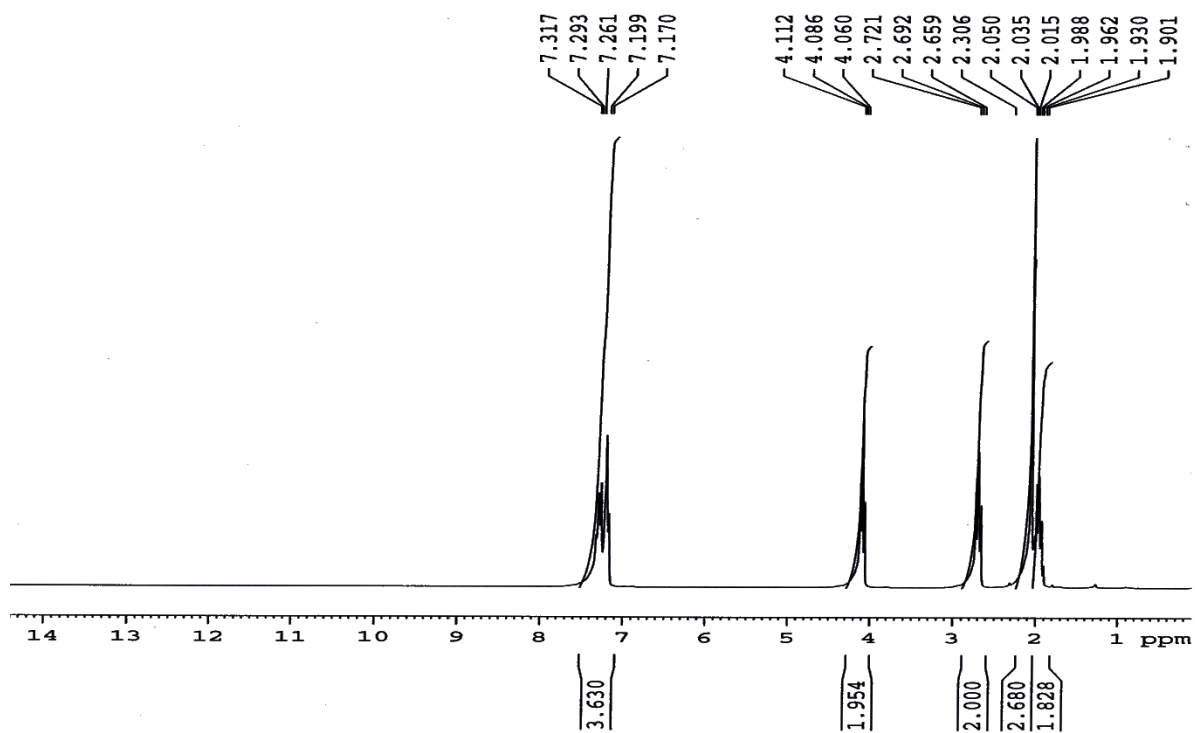

Fig. S40.  $^1\text{H}$ NMR of 3-phenylpropylacetate in  $\text{CDCl}_3$

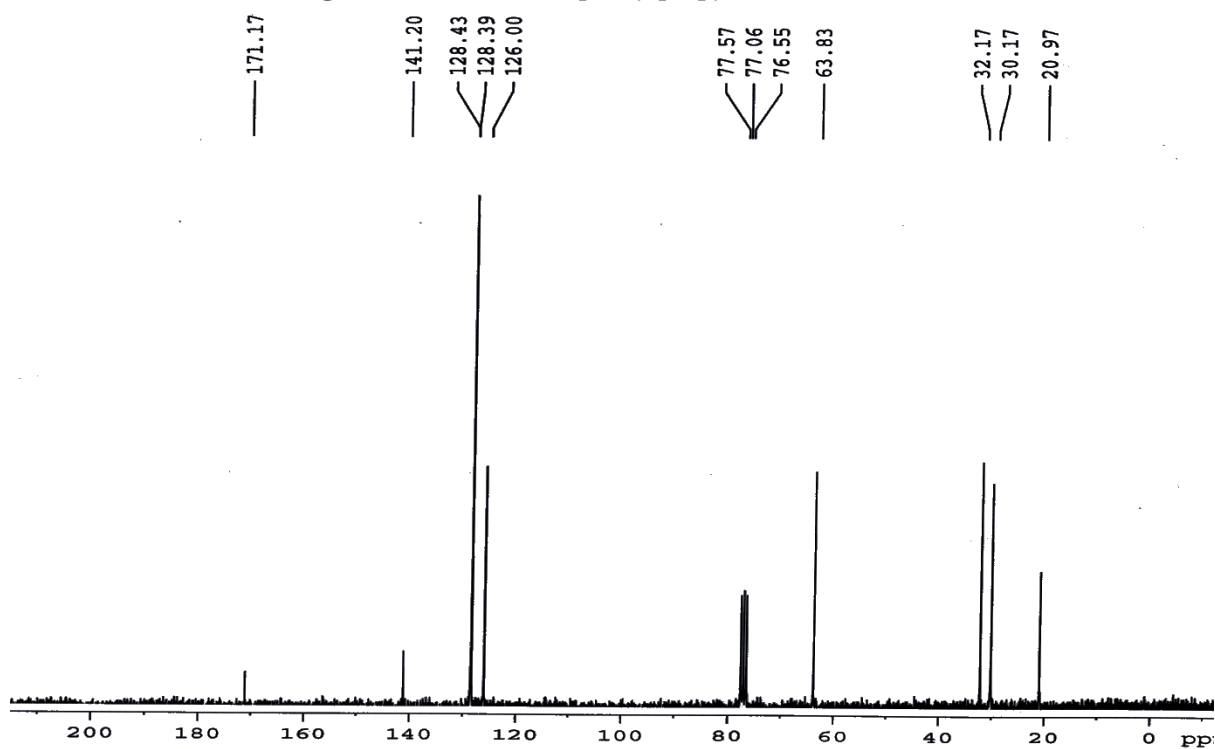

Fig. S41.  $^{13}\text{C}$ NMR of 3-phenylpropylacetate in  $\text{CDCl}_3$

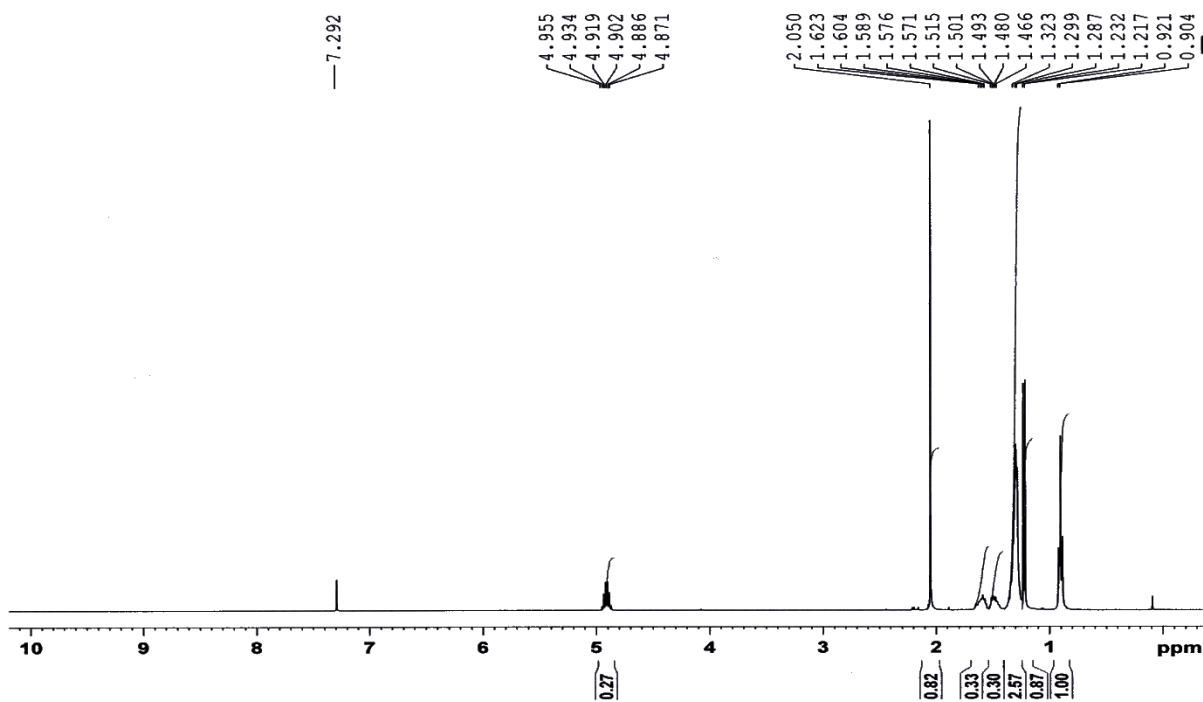

Fig. S42.  $^1\text{H}$ NMR of octan-2-yl-acetate in  $\text{CDCl}_3$

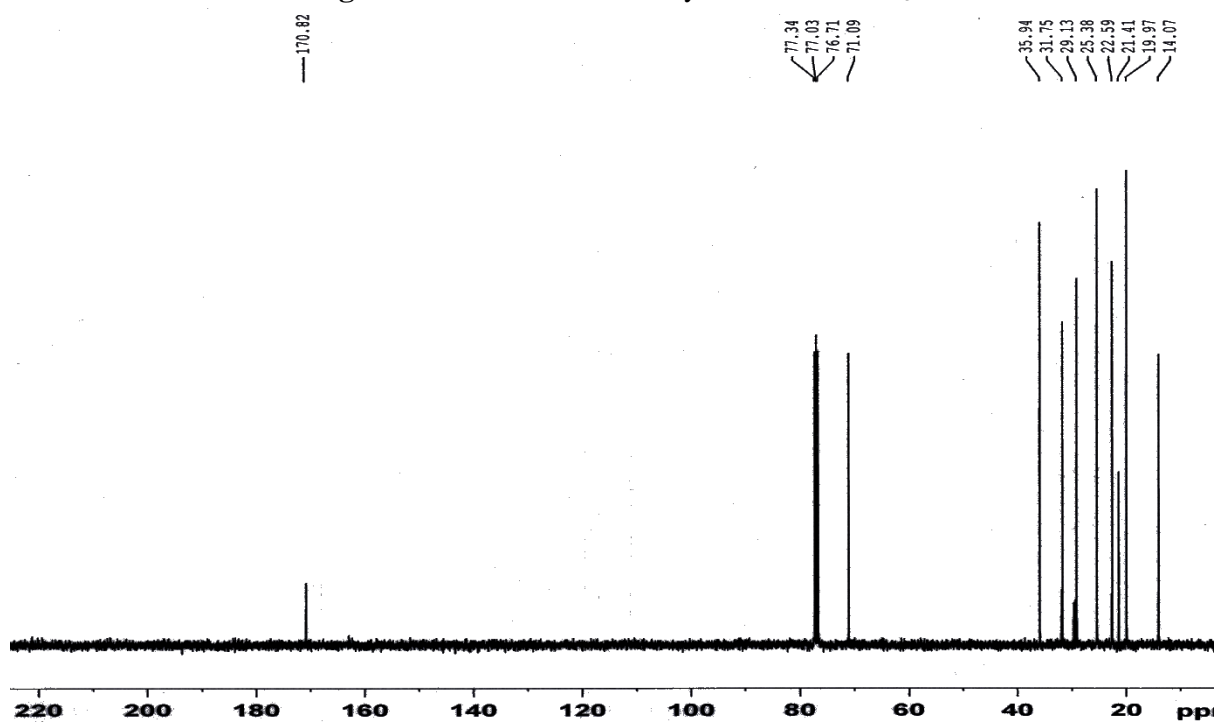

Fig. S43.  $^{13}\text{C}$ NMR of octan-2-yl-acetate in  $\text{CDCl}_3$



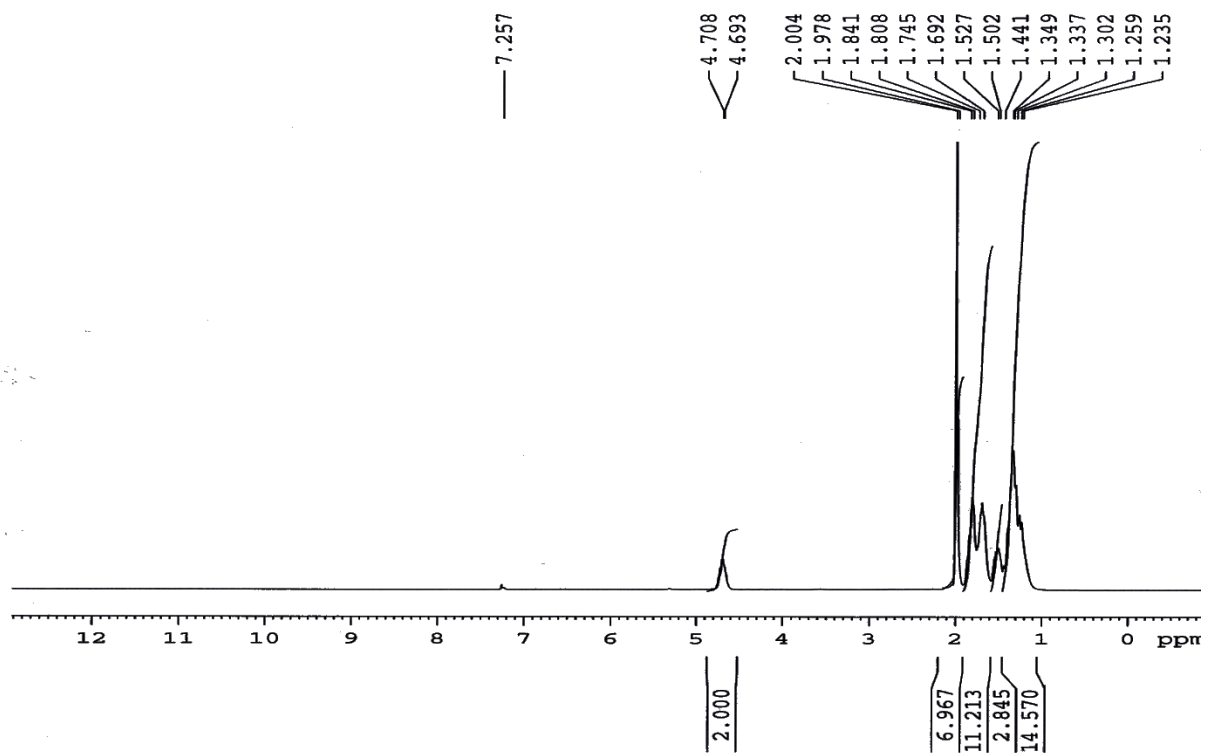

Fig. S44.  $^1\text{H}$ NMR of cyclohexylacetate in  $\text{CDCl}_3$

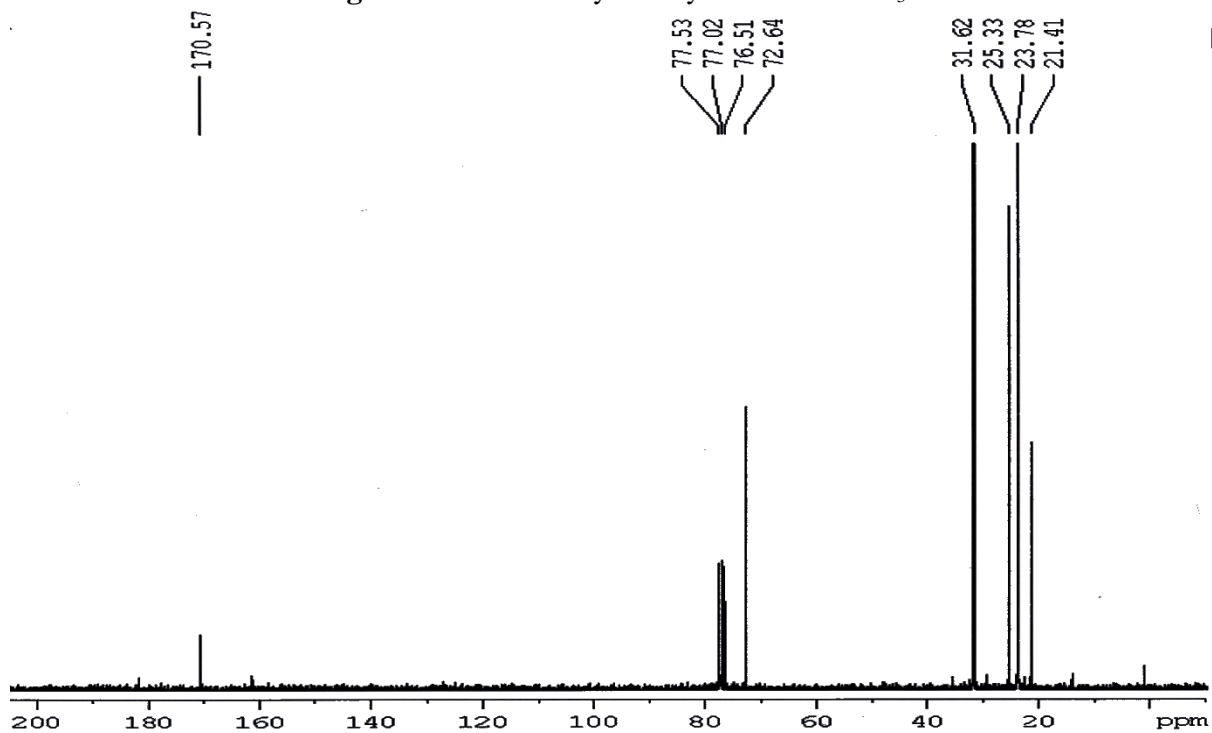

Fig. S45.  $^{13}\text{C}$ NMR of cyclohexylacetate in  $\text{CDCl}_3$

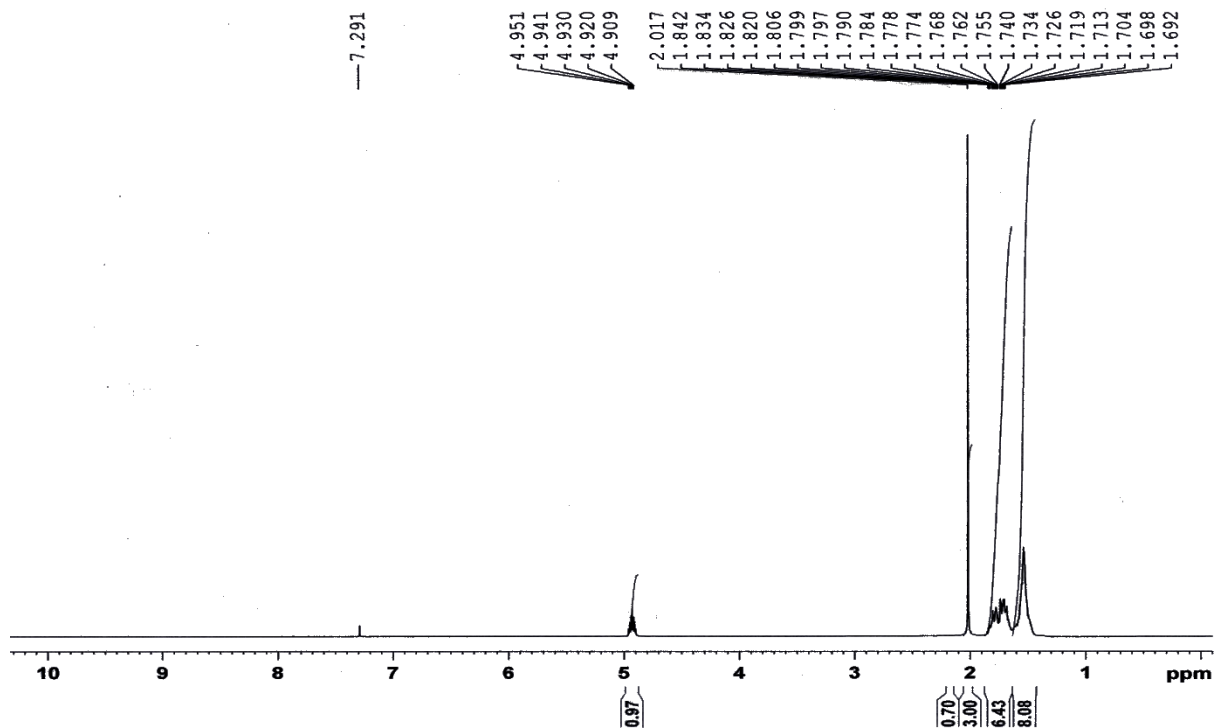

Fig. S46.  $^1\text{H}$ NMR of cyclooctylacetate in  $\text{CDCl}_3$

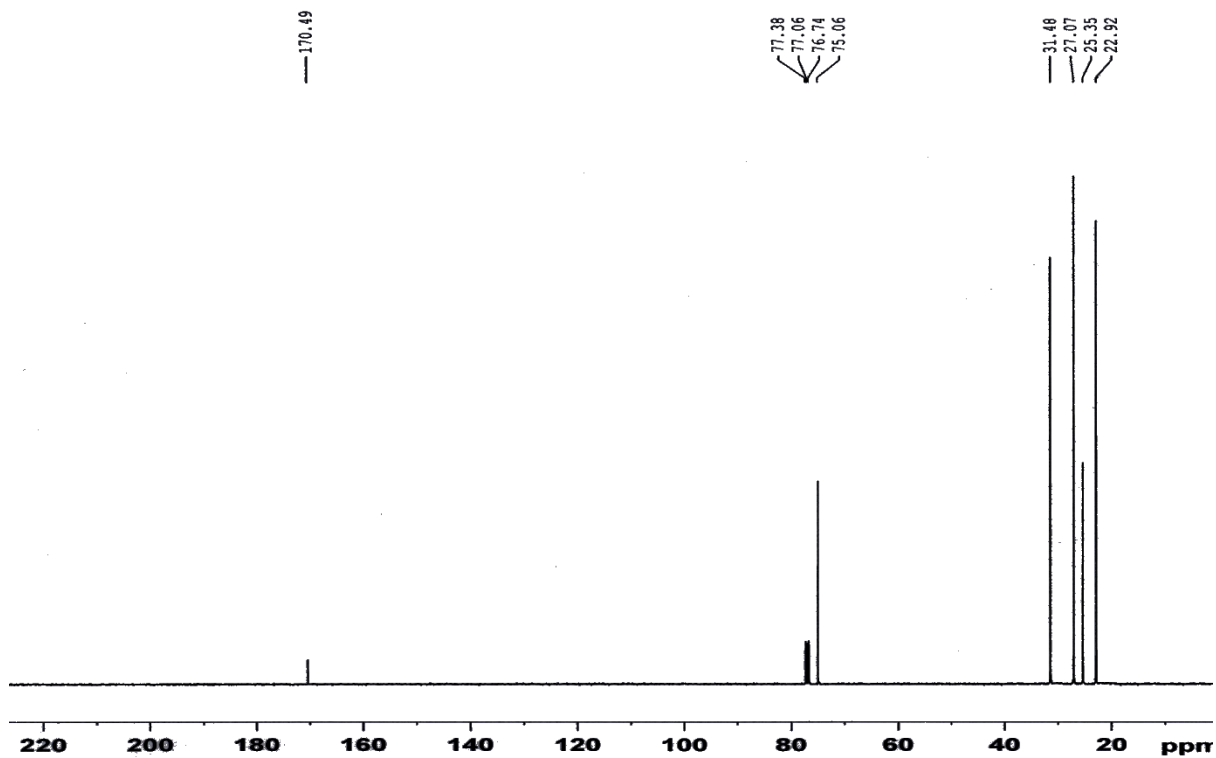

Fig. S47.  $^{13}\text{C}$ NMR of cyclooctylacetate in  $\text{CDCl}_3$

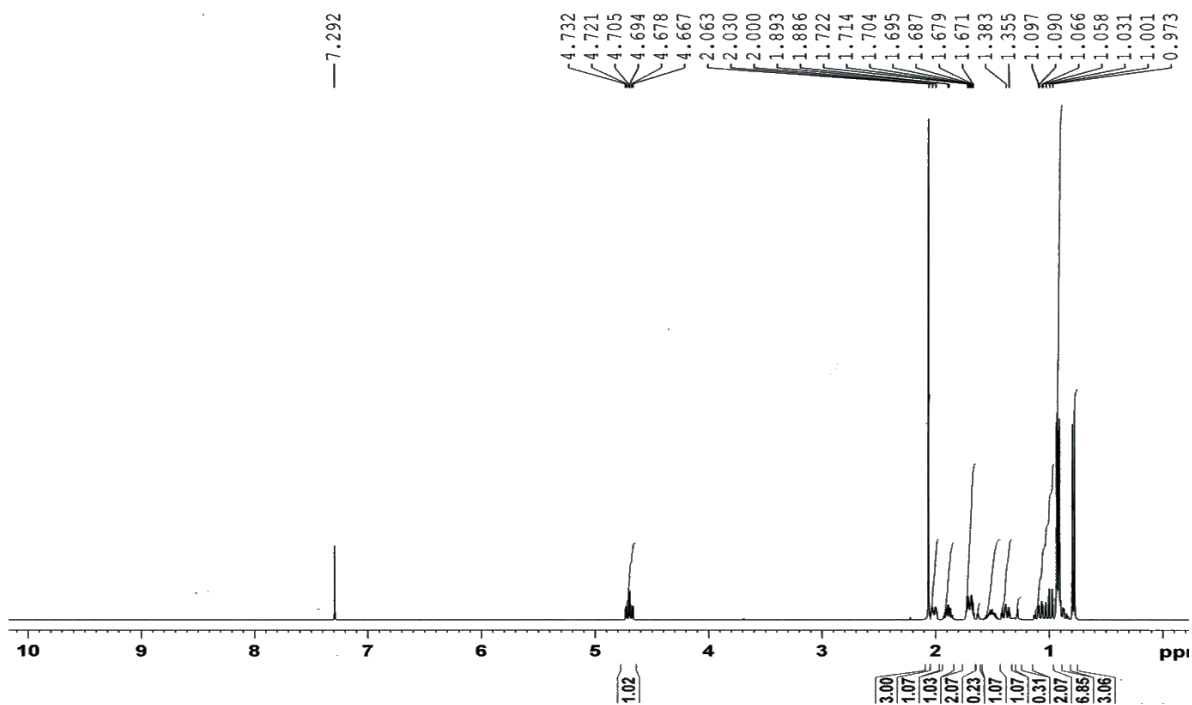

Fig. S48.  $^1\text{H}$ NMR of 2-isopropyl-5-methylcyclohexylacetate in  $\text{CDCl}_3$

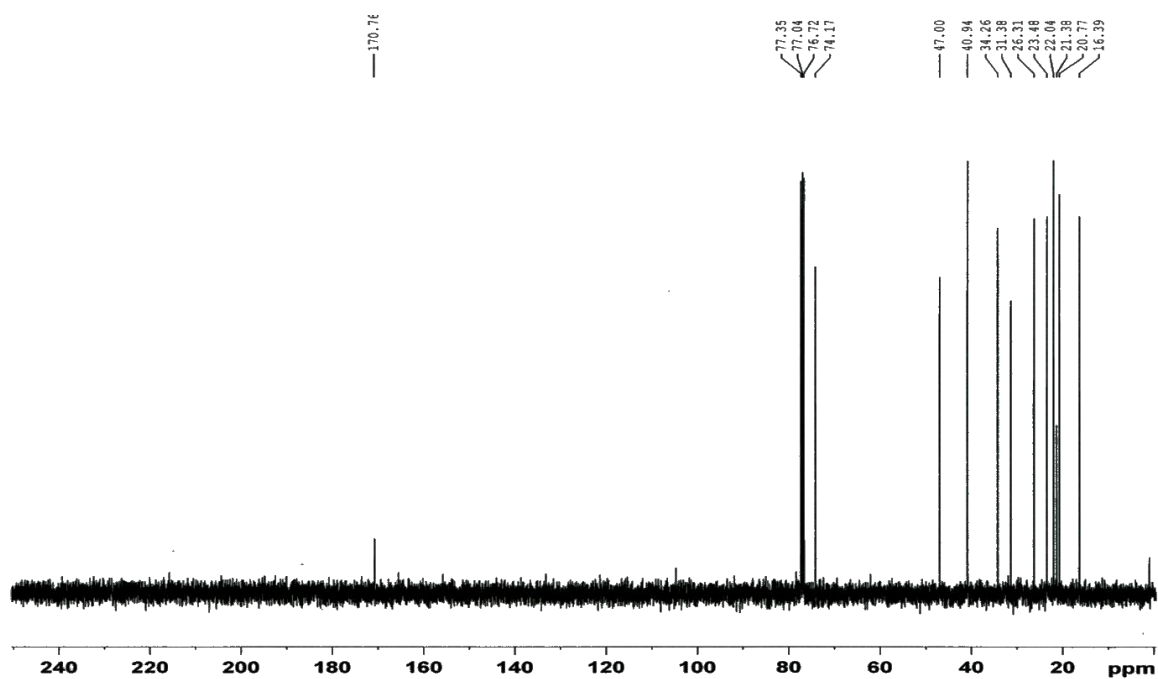

Fig. S49.  $^{13}\text{C}$ NMR of 2-isopropyl-5-methylcyclohexylacetate in  $\text{CDCl}_3$

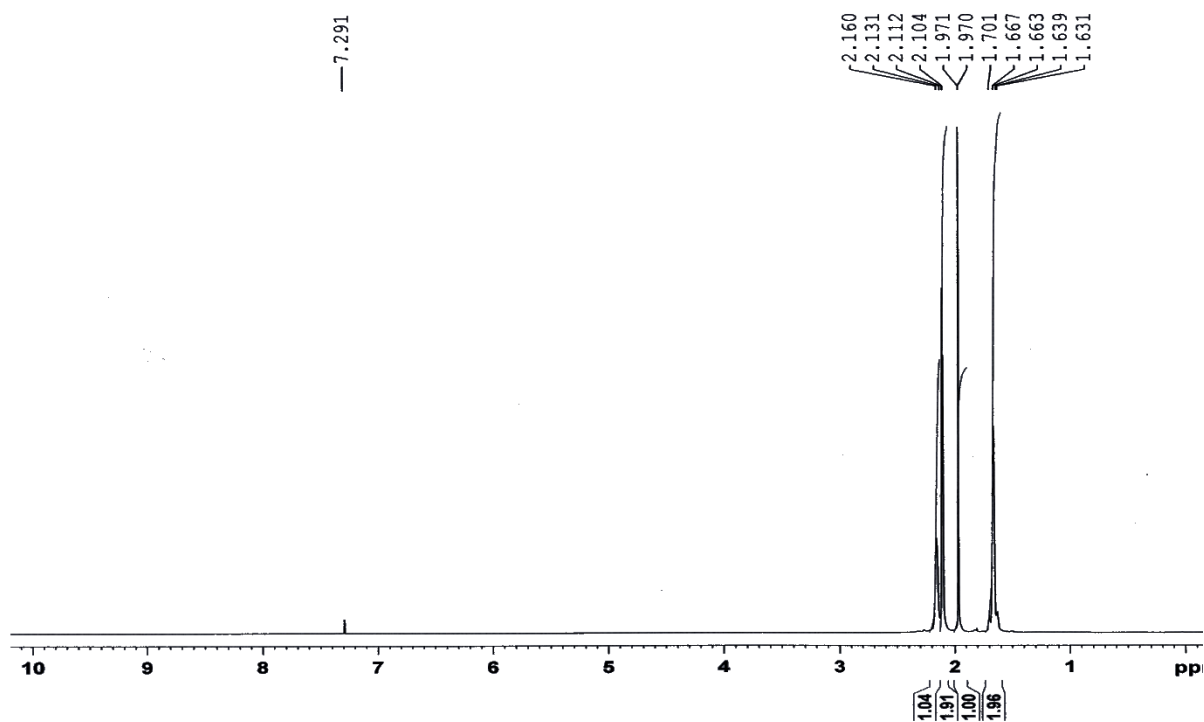

Fig. S50.  $^1\text{H}$ NMR of adamantane-1-yl-acetate in  $\text{CDCl}_3$

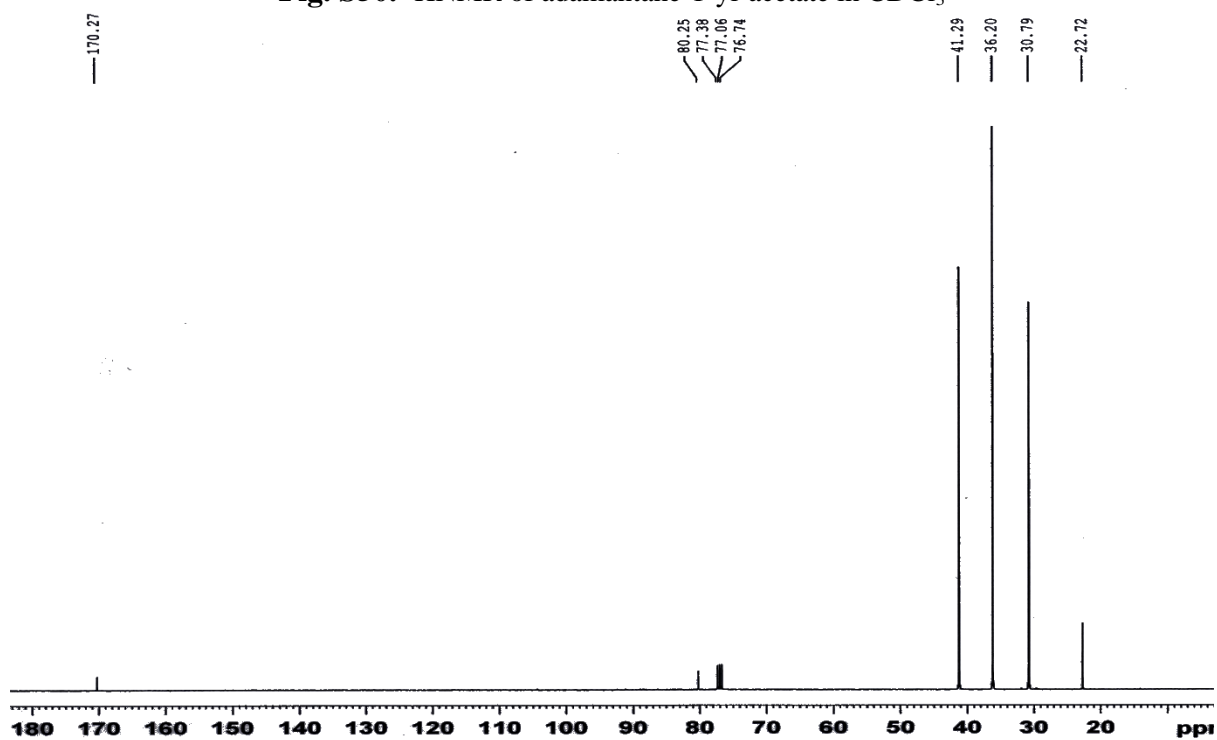

Fig. S51.  $^{13}\text{C}$ NMR of adamantane-1-yl-acetate in  $\text{CDCl}_3$

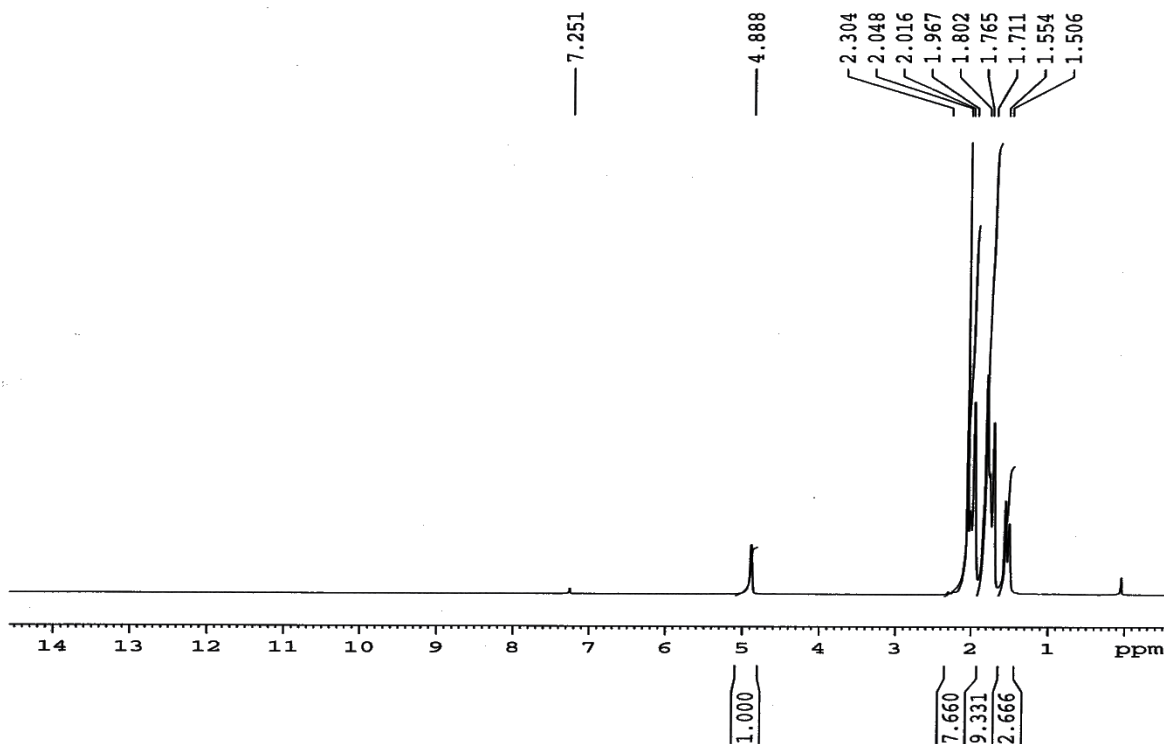

**Fig. S52.**  $^1\text{H NMR}$  of adamantane-2-yl-acetate in  $\text{CDCl}_3$

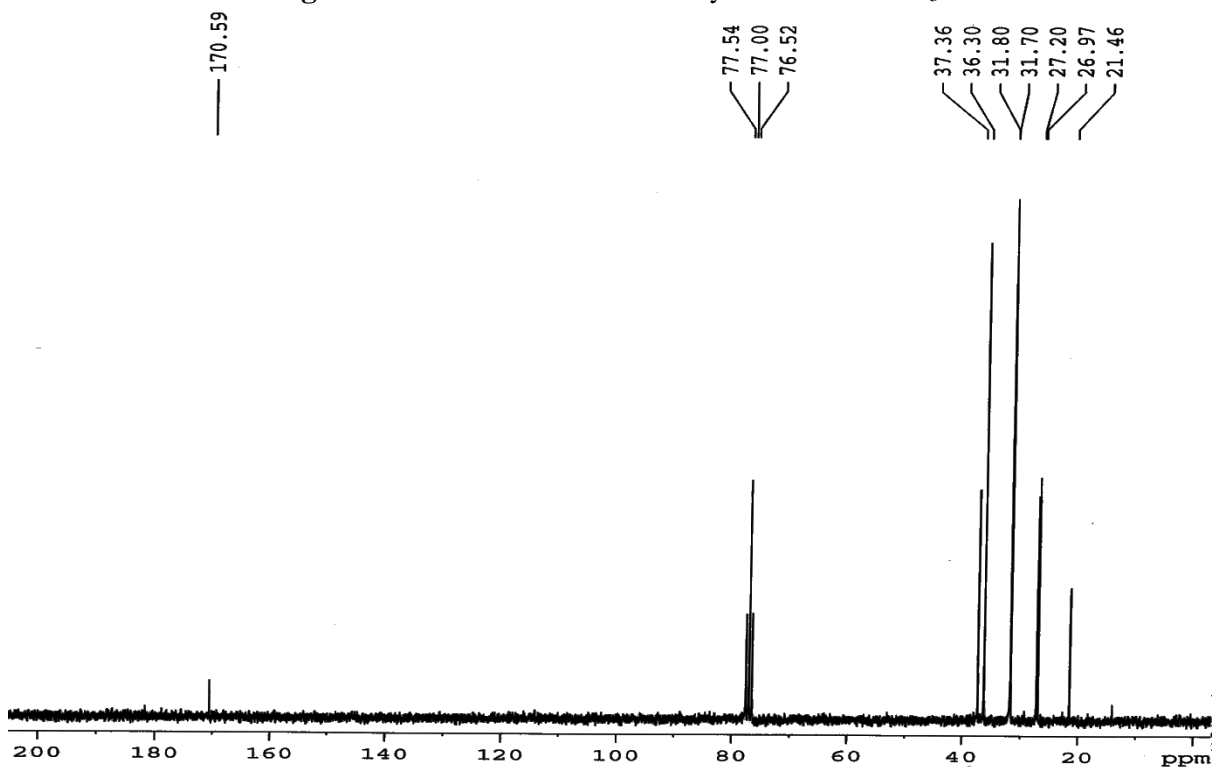

**Fig. S53.**  $^{13}\text{C NMR}$  of adamantane-2-yl-acetate in  $\text{CDCl}_3$

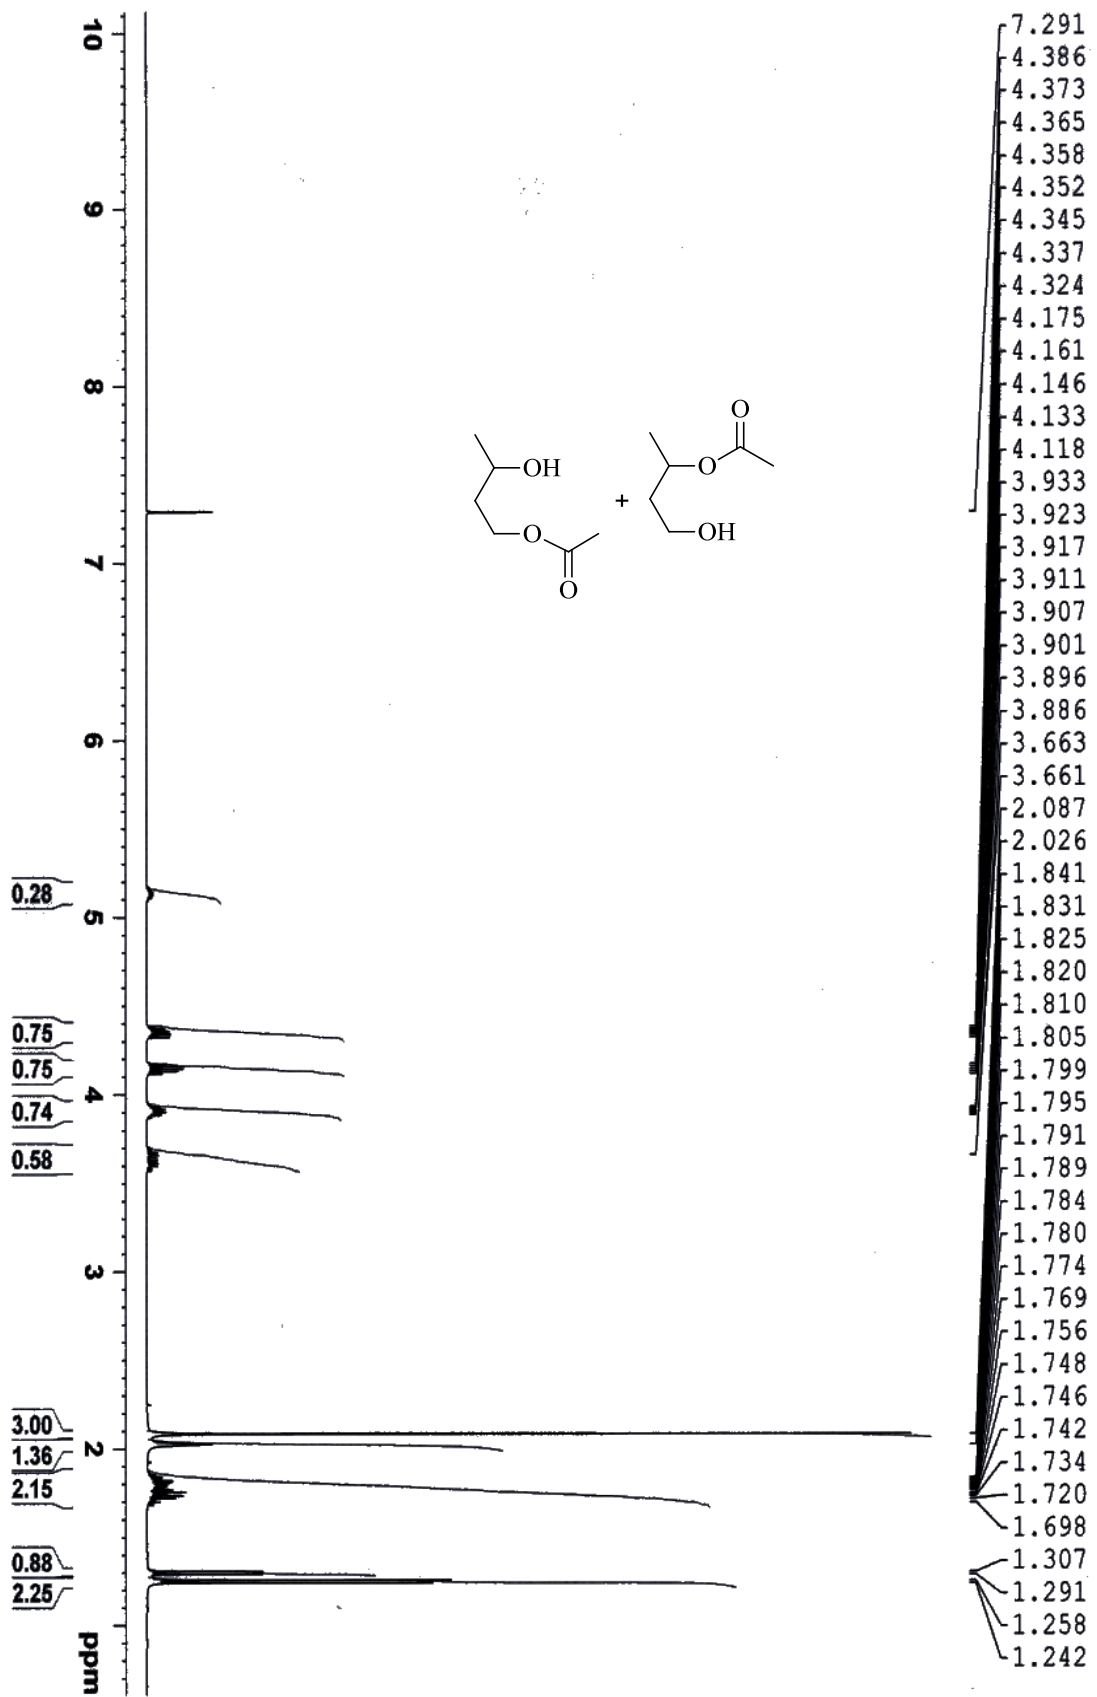

Fig. S54. <sup>1</sup>H NMR 3-Hydroxybutyl acetate compound with 4-hydroxybutan-2-yl acetate (2.5:1)

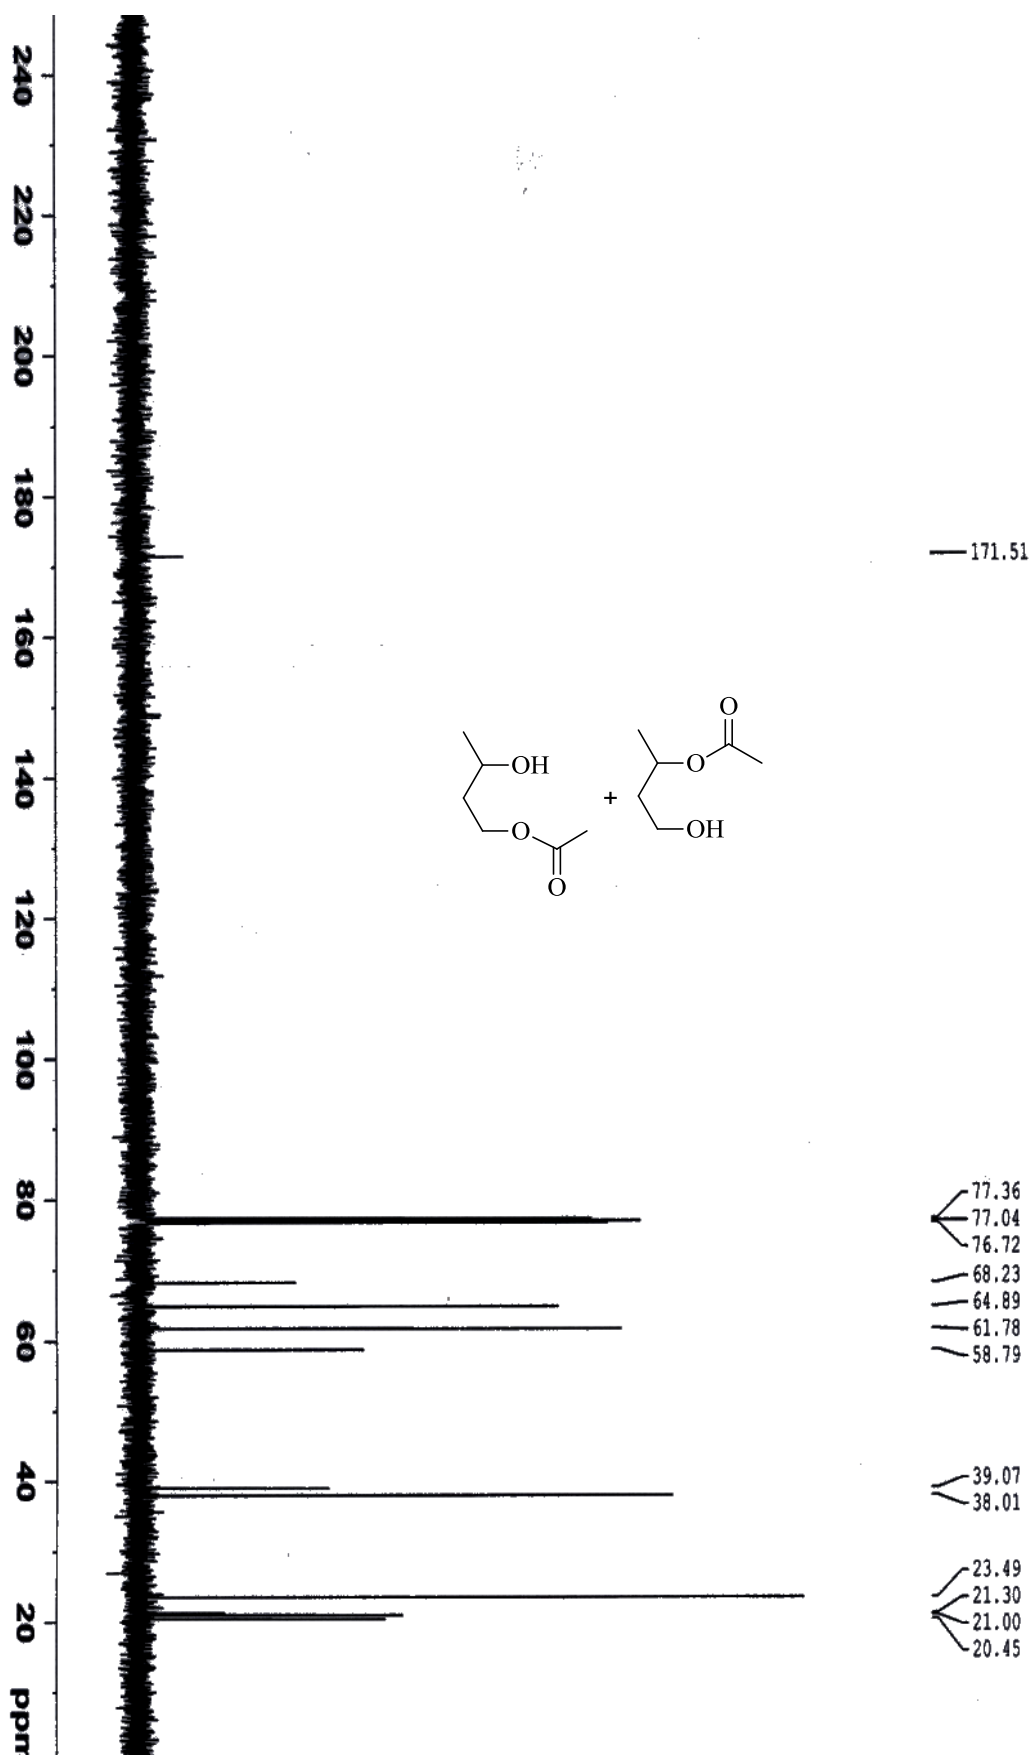

Fig. S55. <sup>13</sup>CNMR 3-Hydroxybutyl acetate compound with 4-hydroxybutan-2-yl acetate (2.5:1)

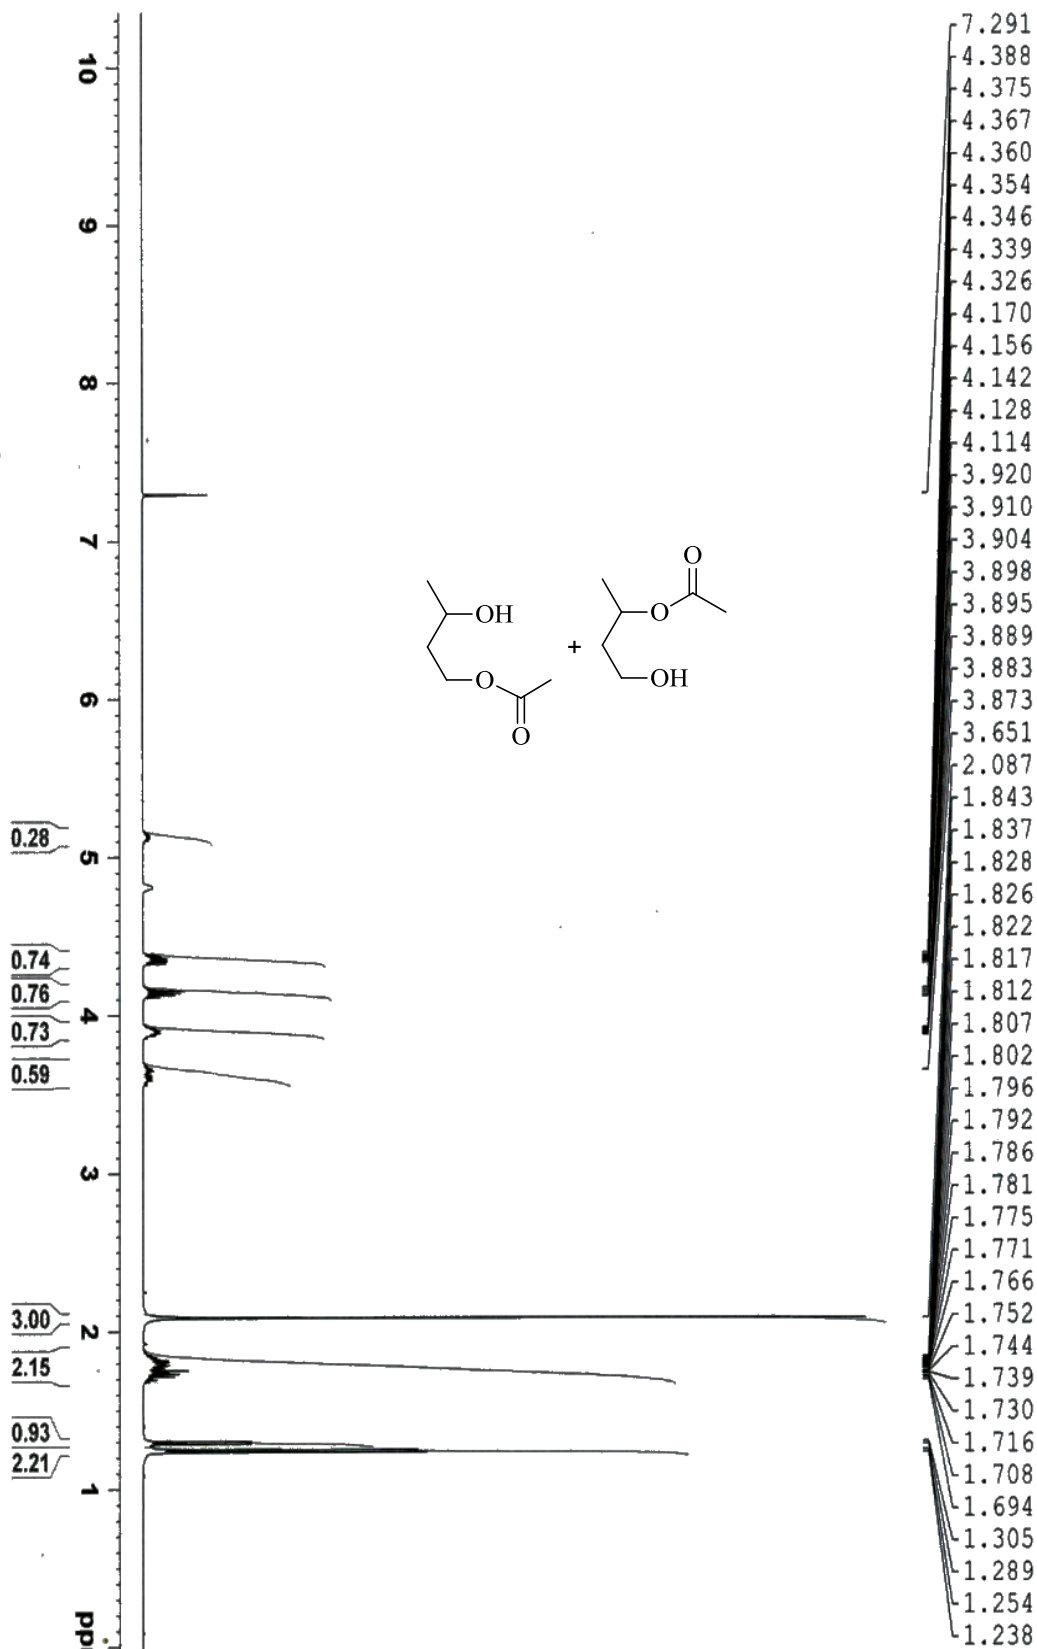

Fig. S56.  $^1\text{H}$  NMR ( $\text{D}_2\text{O}$ ) 3-Hydroxybutyl acetate compound with 4-hydroxybutan-2-yl acetate (2.5:1)



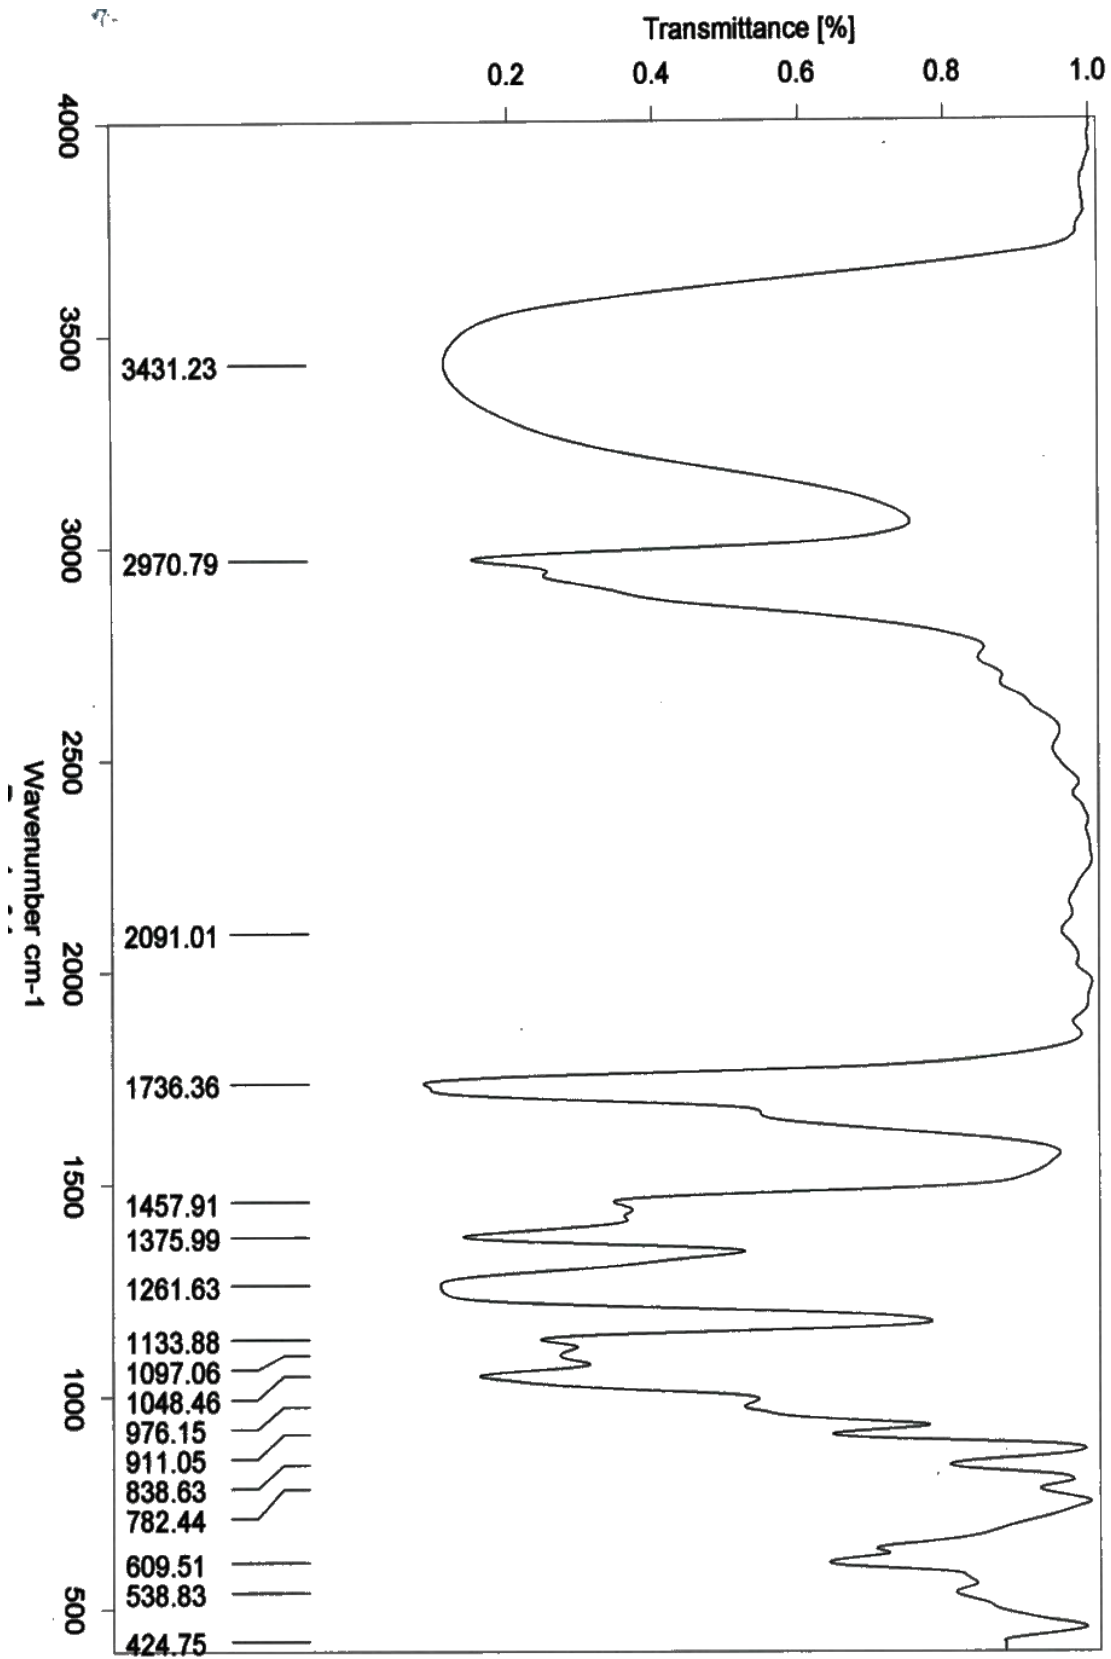

Fig. S57. IR (neat) 3-Hydroxybutyl acetate compound with 4-hydroxybutan-2-yl acetate (2.5:1)

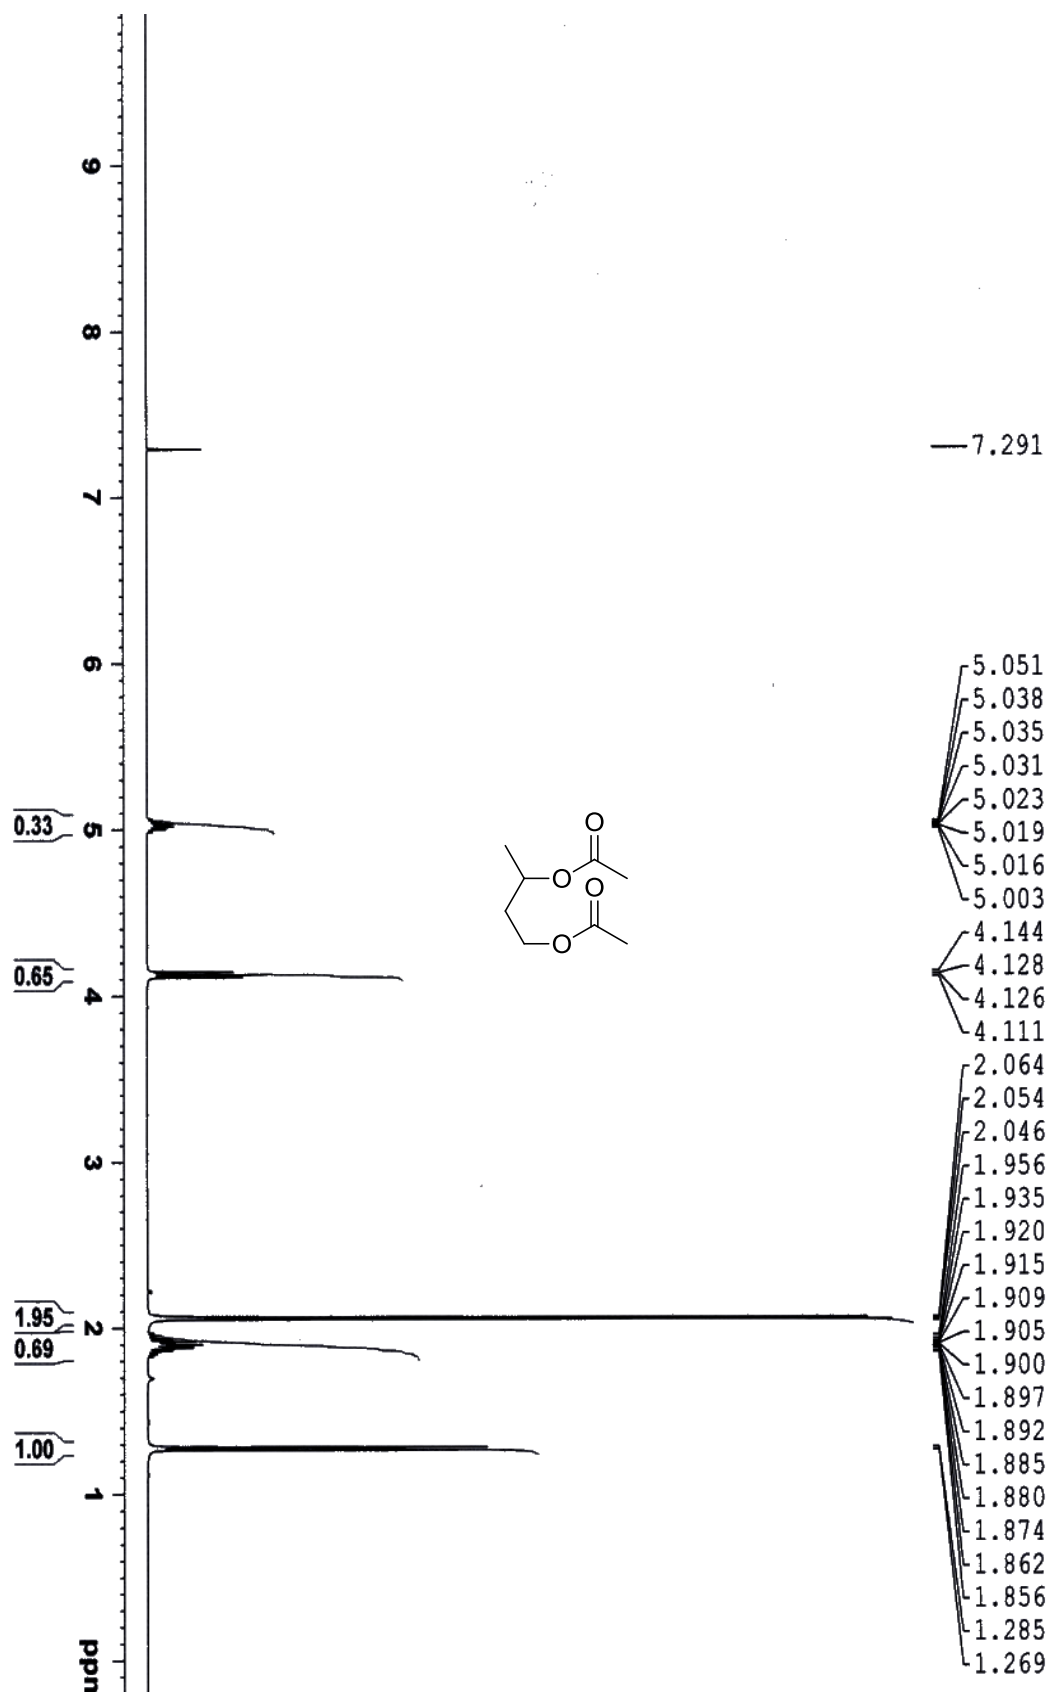

Fig. S58. <sup>1</sup>H NMR Butane-1,3-diyl diacetate

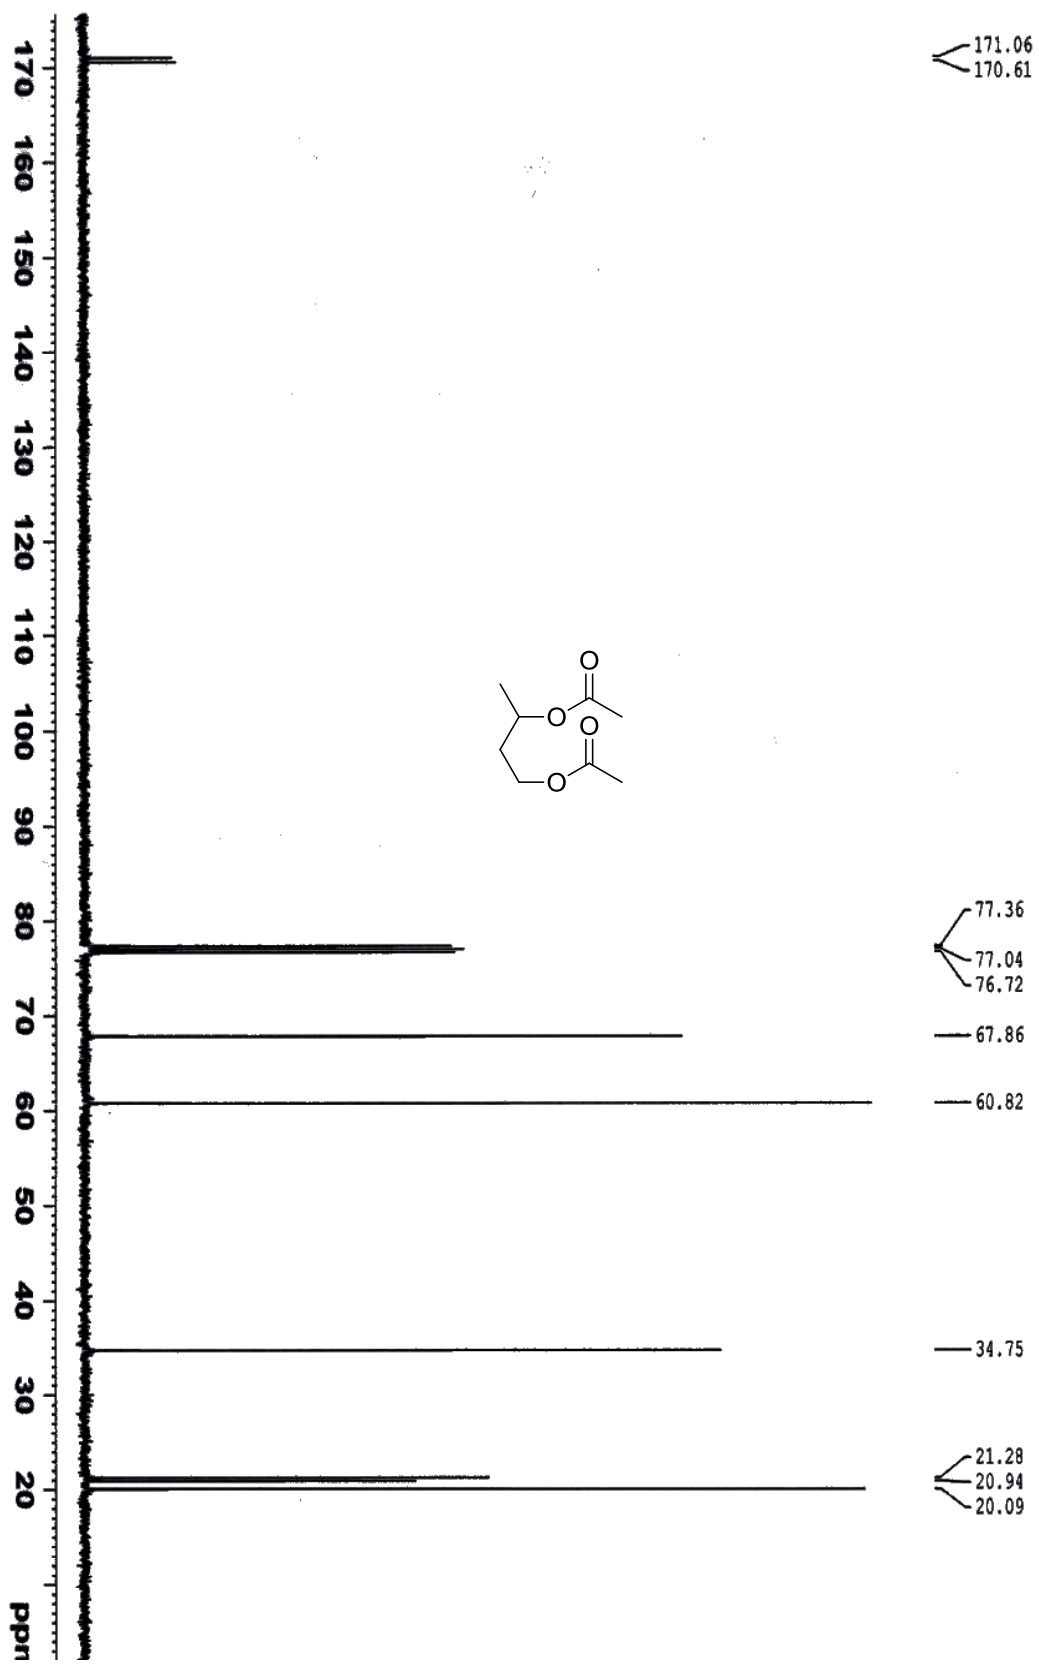

Fig. S59.  $^{13}\text{C}$  NMR Butane-1,3-diyl diacetate

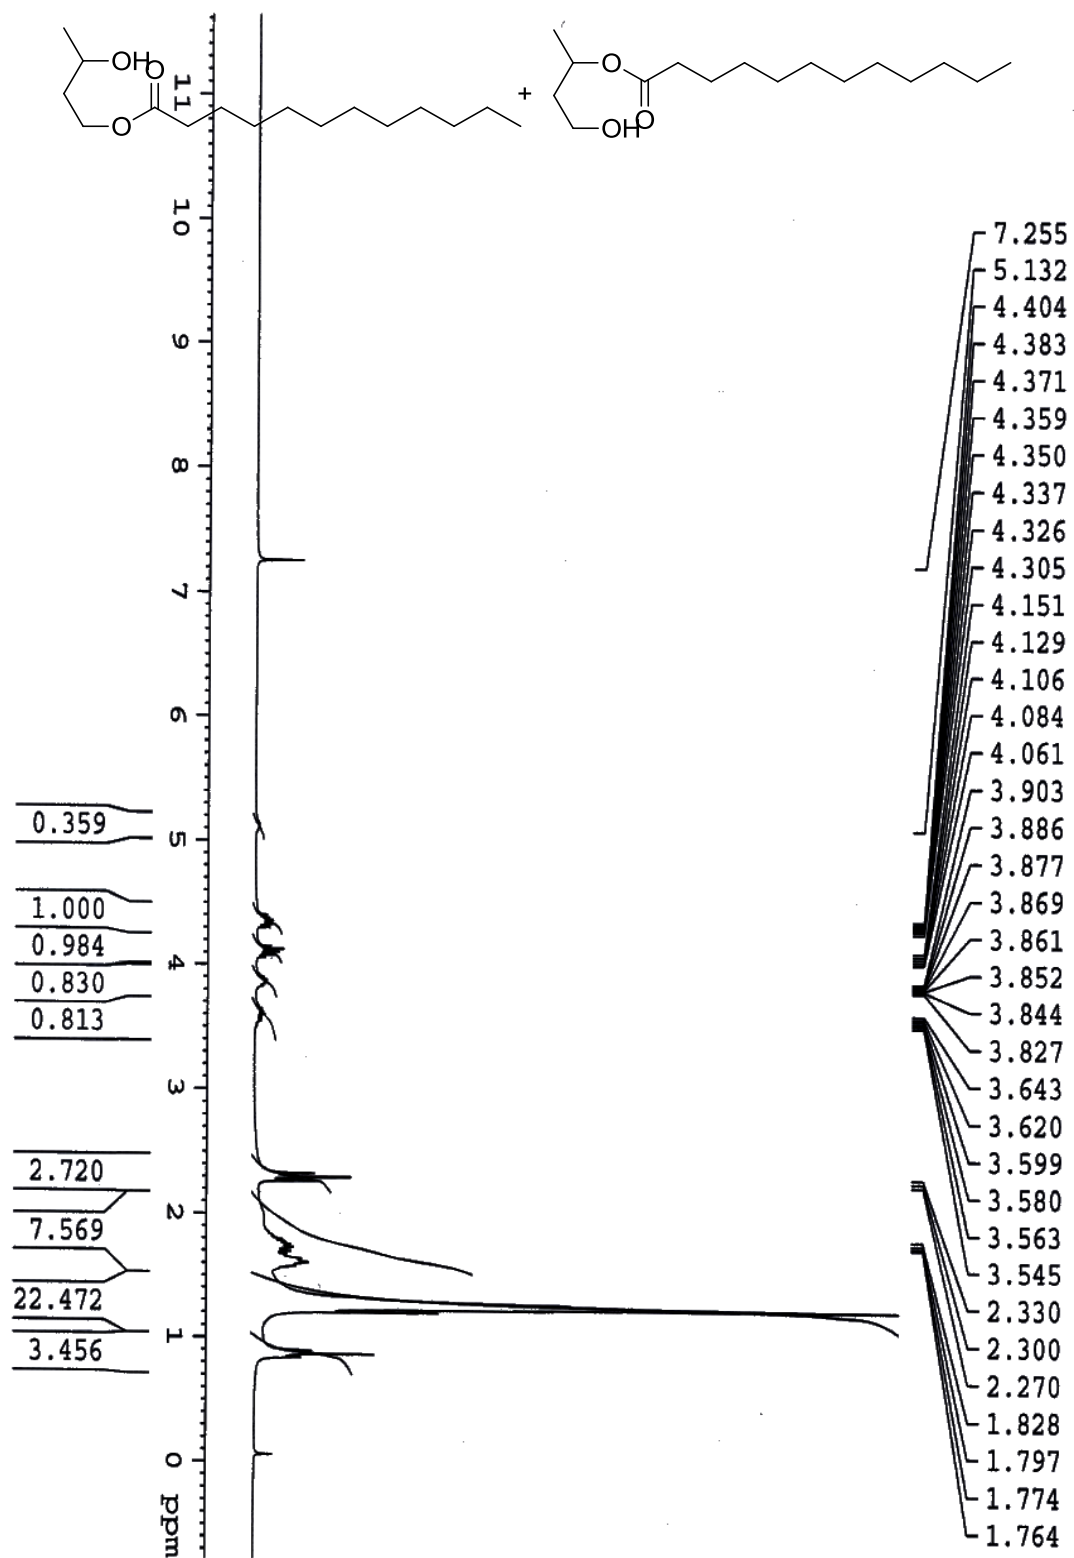

**Fig. S60.**  $^1\text{H}$  NMR 3-Hydroxybutyl dodecanoate compound with 4-hydroxybutan-2-yl dodecanoate (2.5:1)

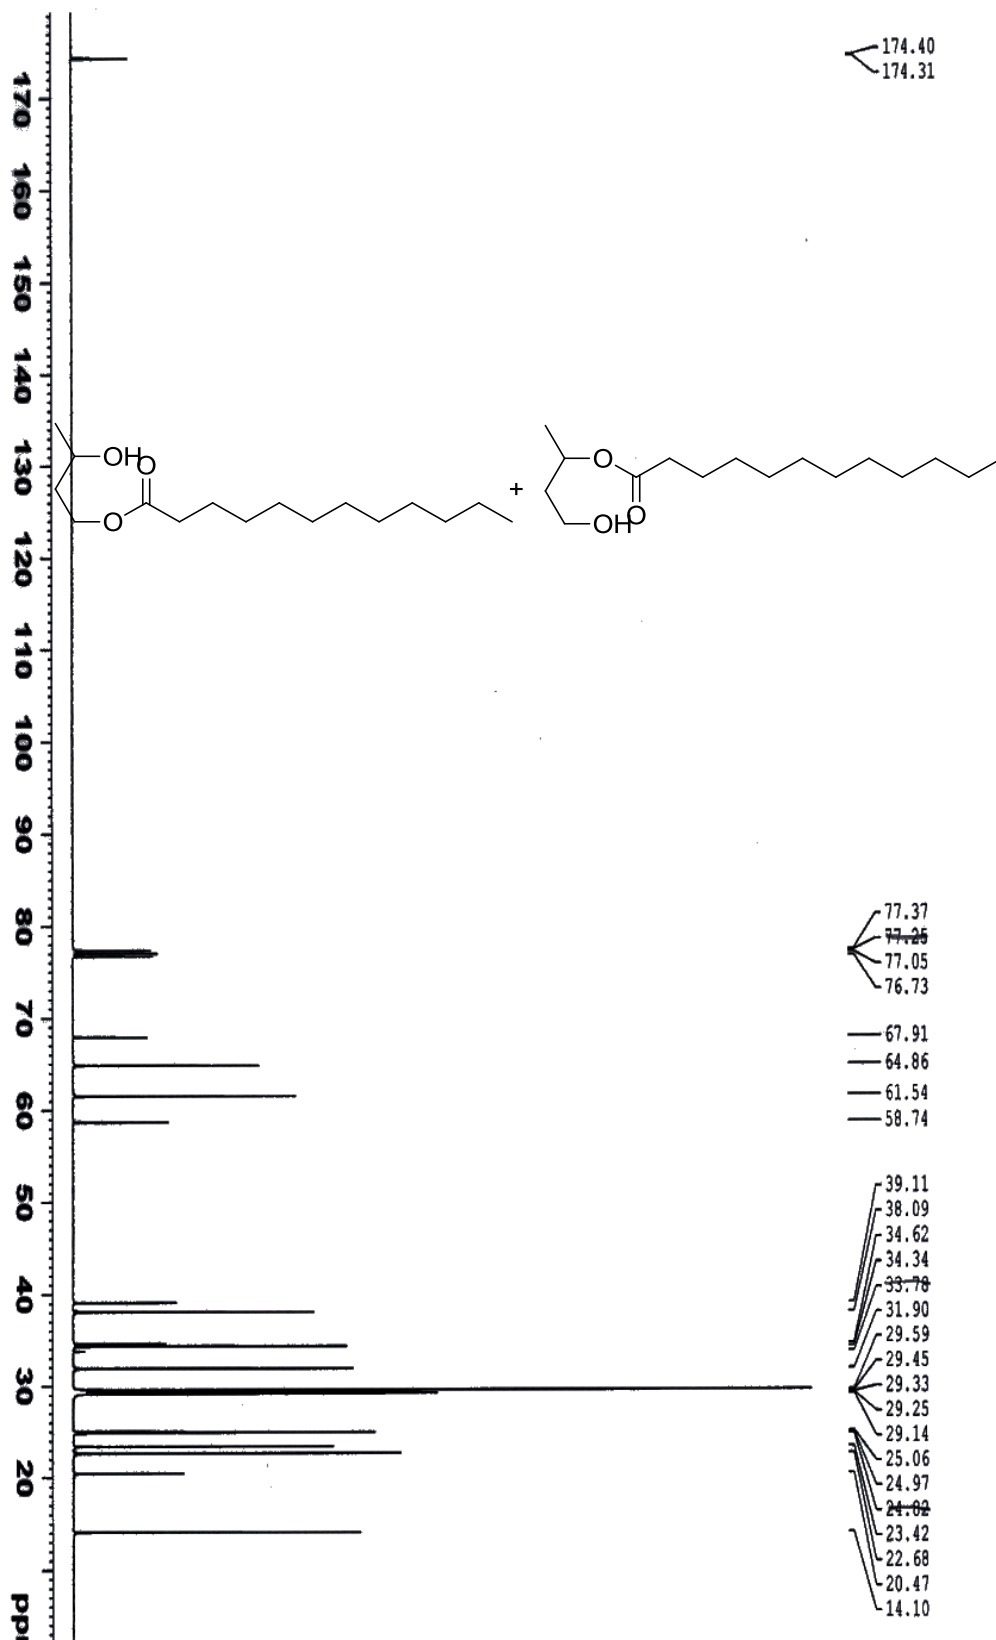

**Fig. S61.**  $^{13}\text{C}$  NMR 3-Hydroxybutyl dodecanoate compound with 4-hydroxybutan-2-yl dodecanoate (2.5:1)

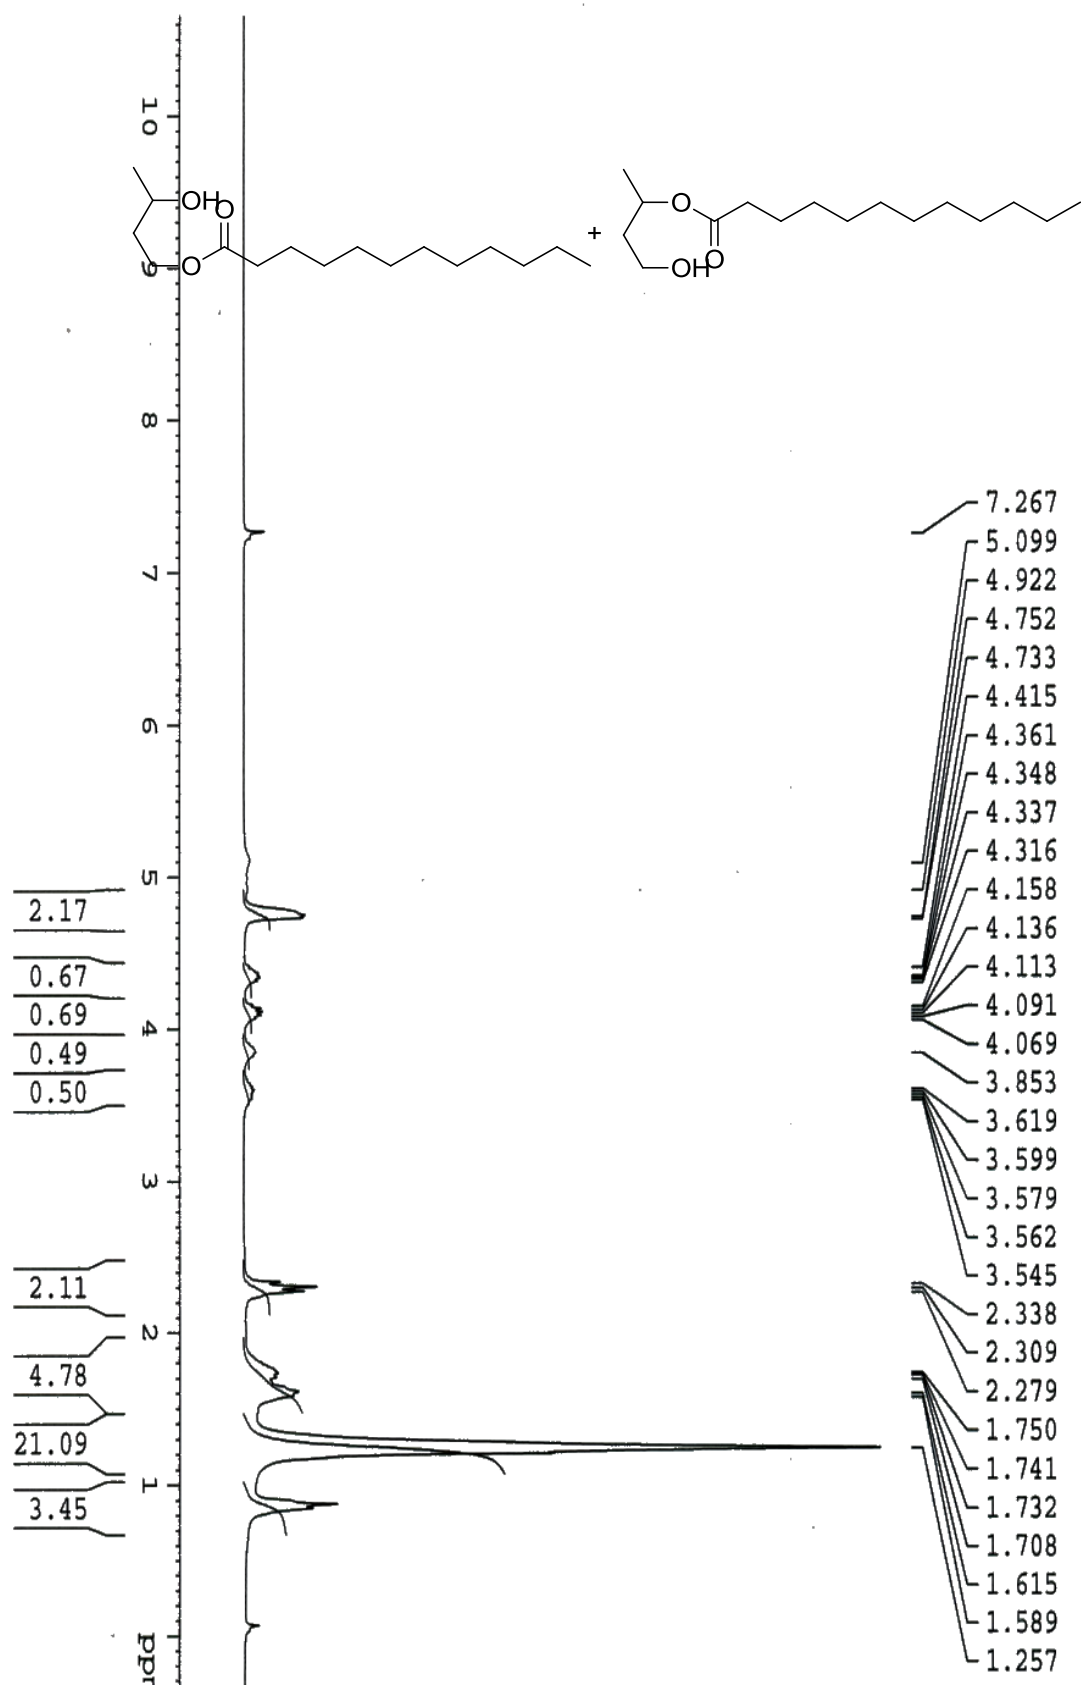

**Fig. S62.** <sup>1</sup>H NMR (D<sub>2</sub>O) 3-Hydroxybutyl dodecanoate compound with 4-hydroxybutan-2-yl dodecanoate (2.5:1)

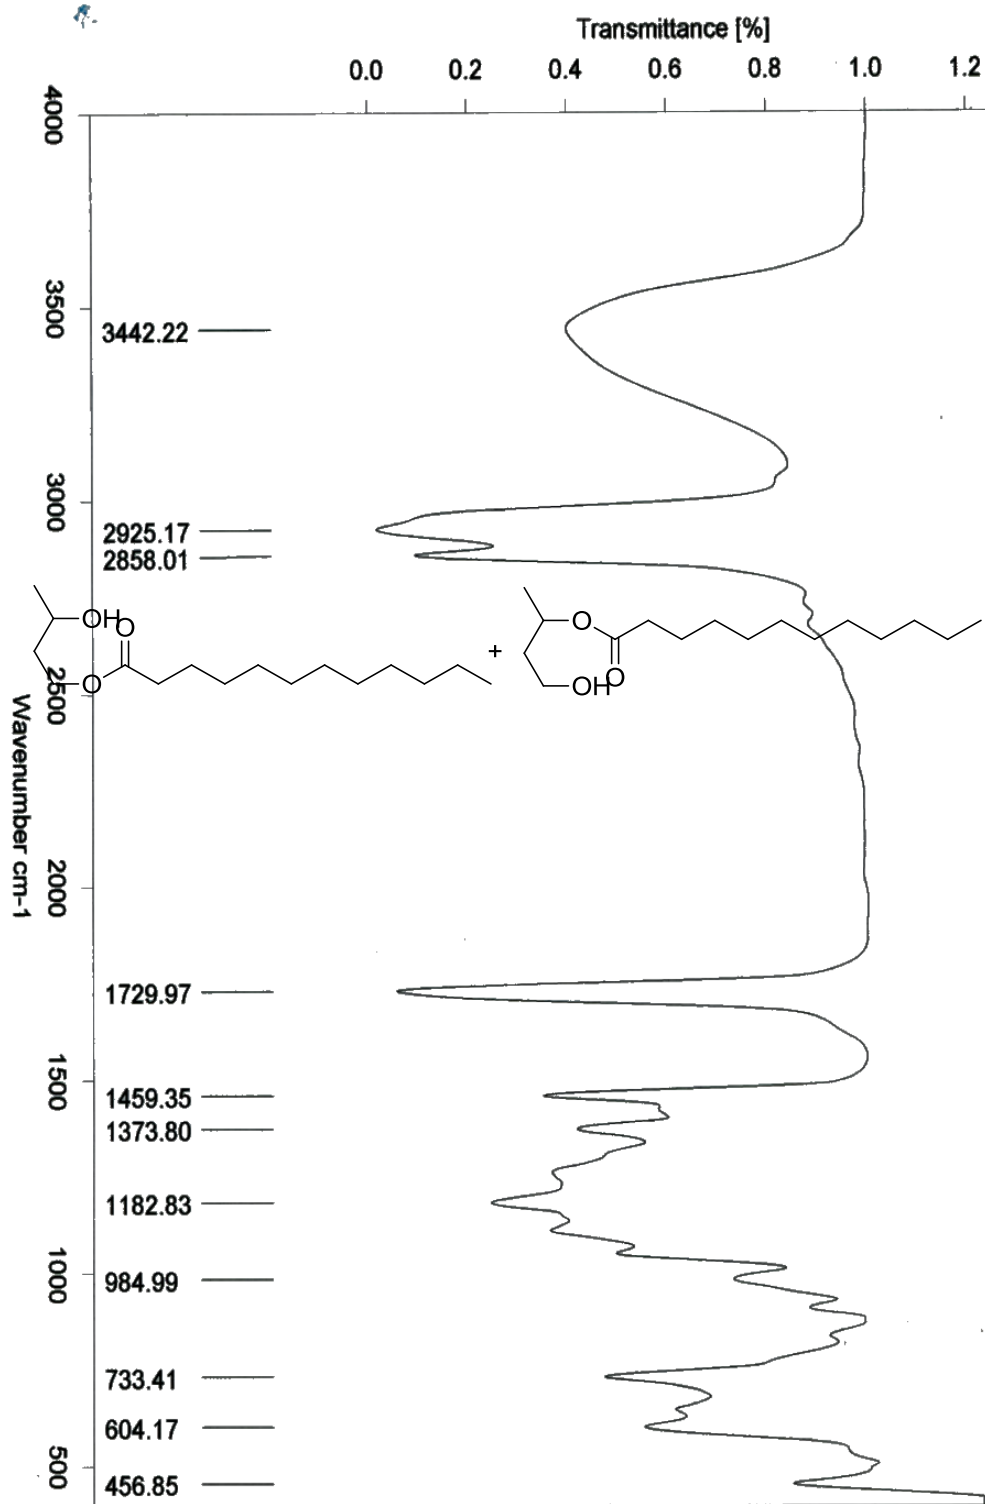

**Fig. S63.** IR (neat) 3-Hydroxybutyl dodecanoate compound with 4-hydroxybutan-2-yl dodecanoate (2.5:1)

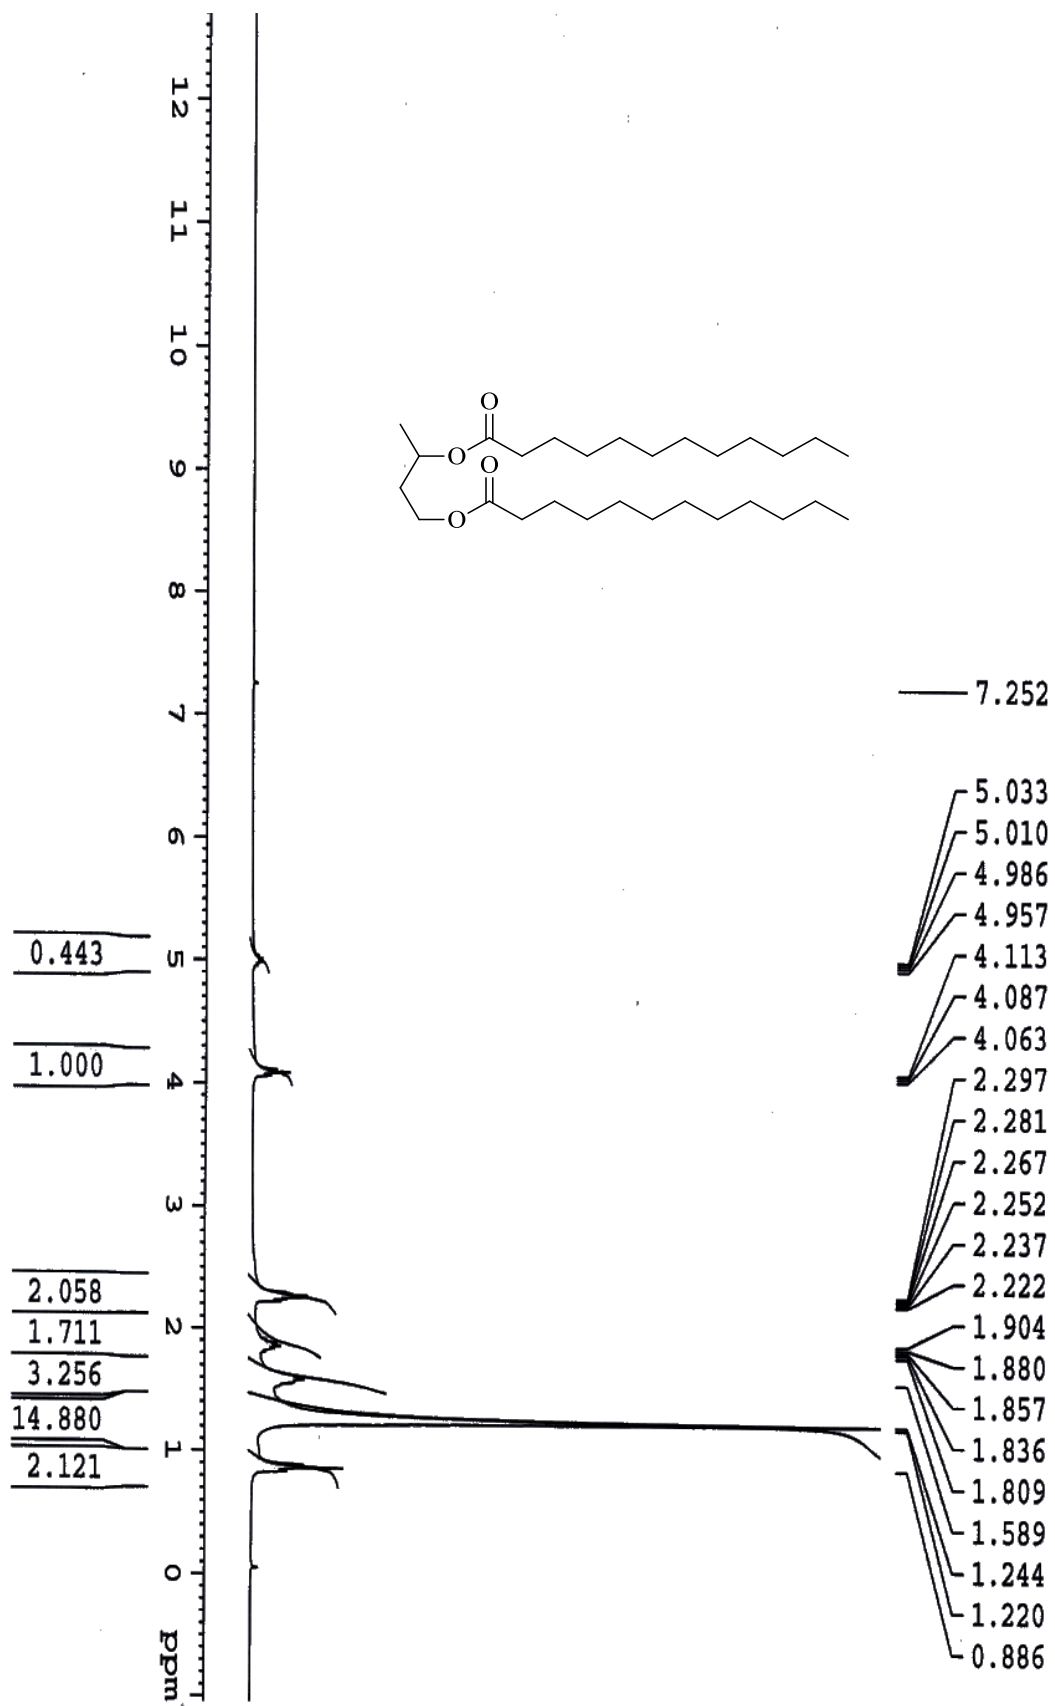

Fig. S64. <sup>1</sup>H NMR Butane-1,3-diyl didodecanoate



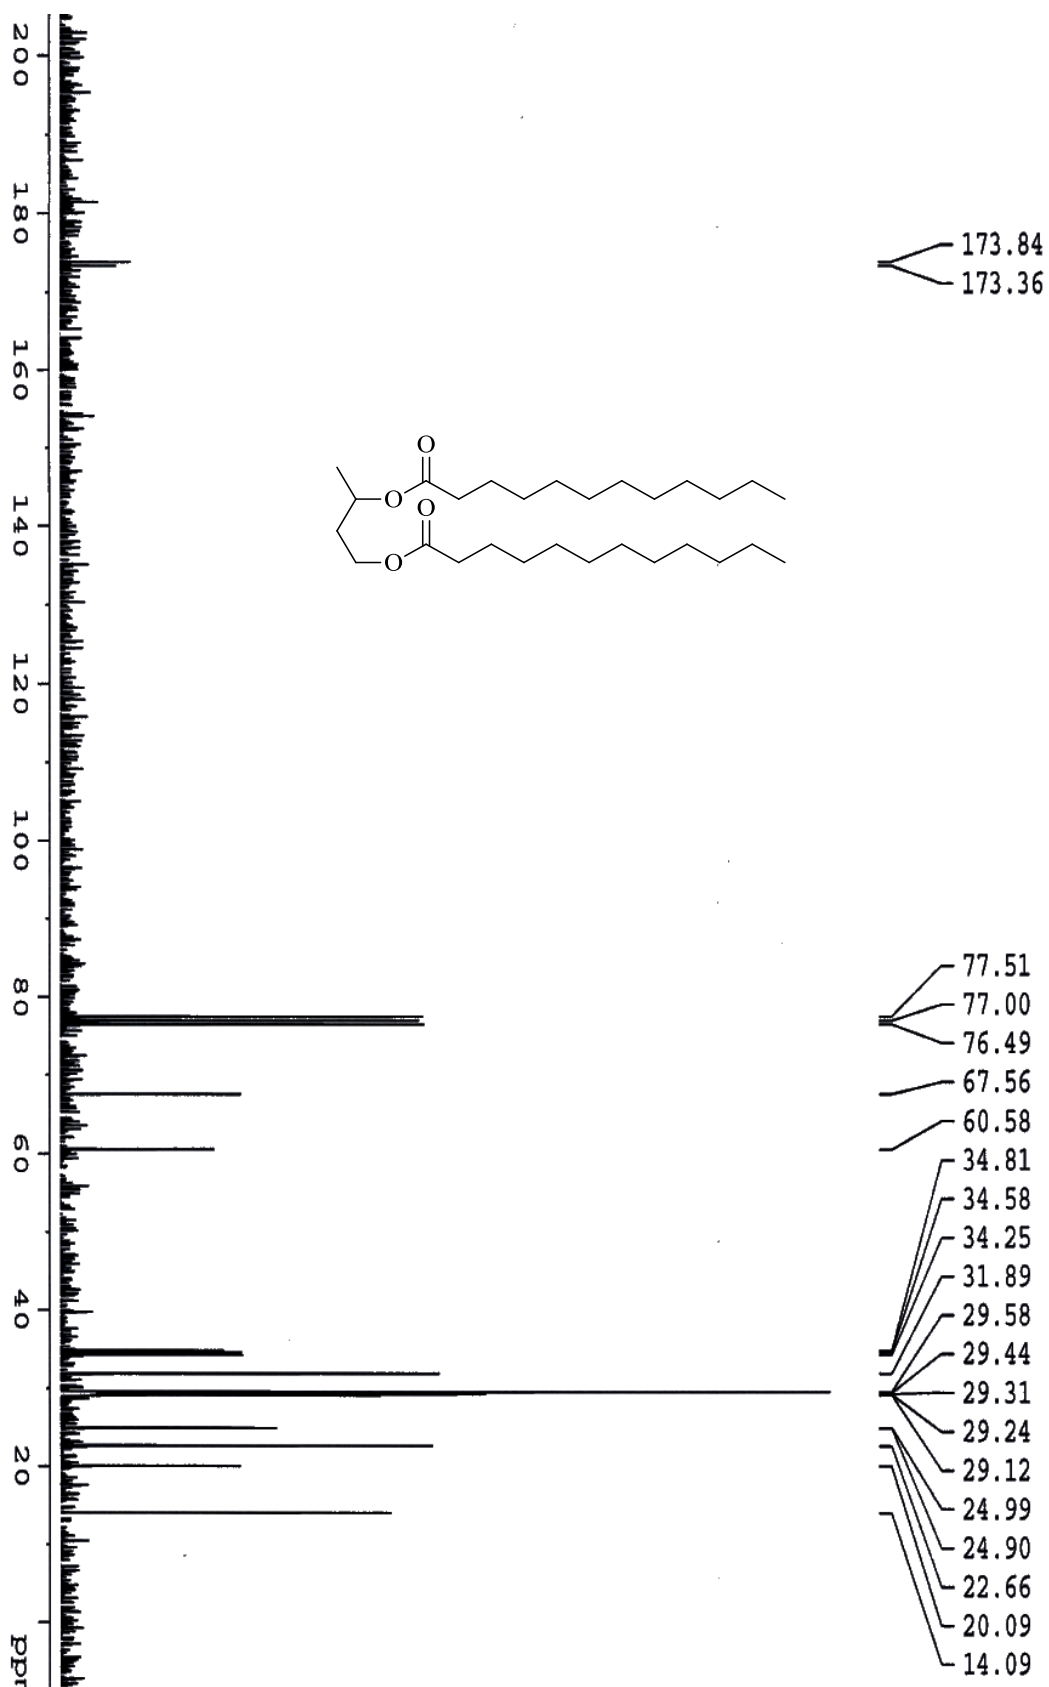

Fig. S65.  $^{13}\text{C}$  NMR Butane-1,3-diyl didodecanoate

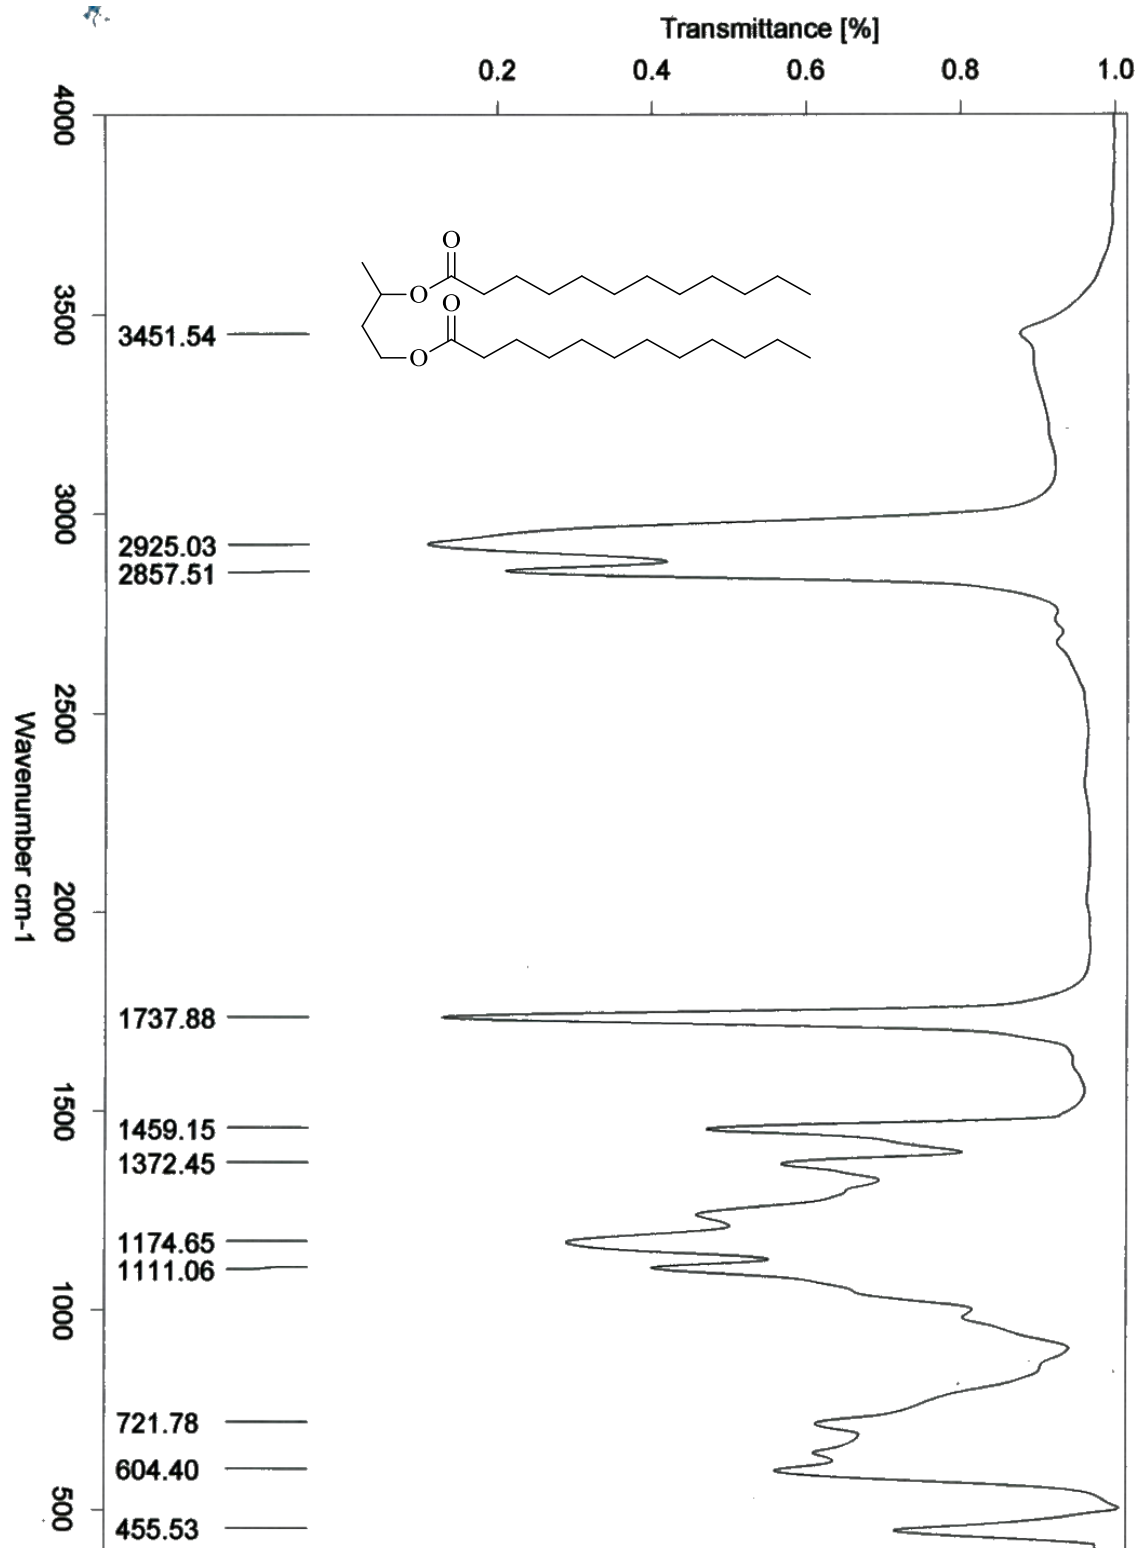

Fig. S66. IR (neat) Butane-1,3-diyl didodecanoate

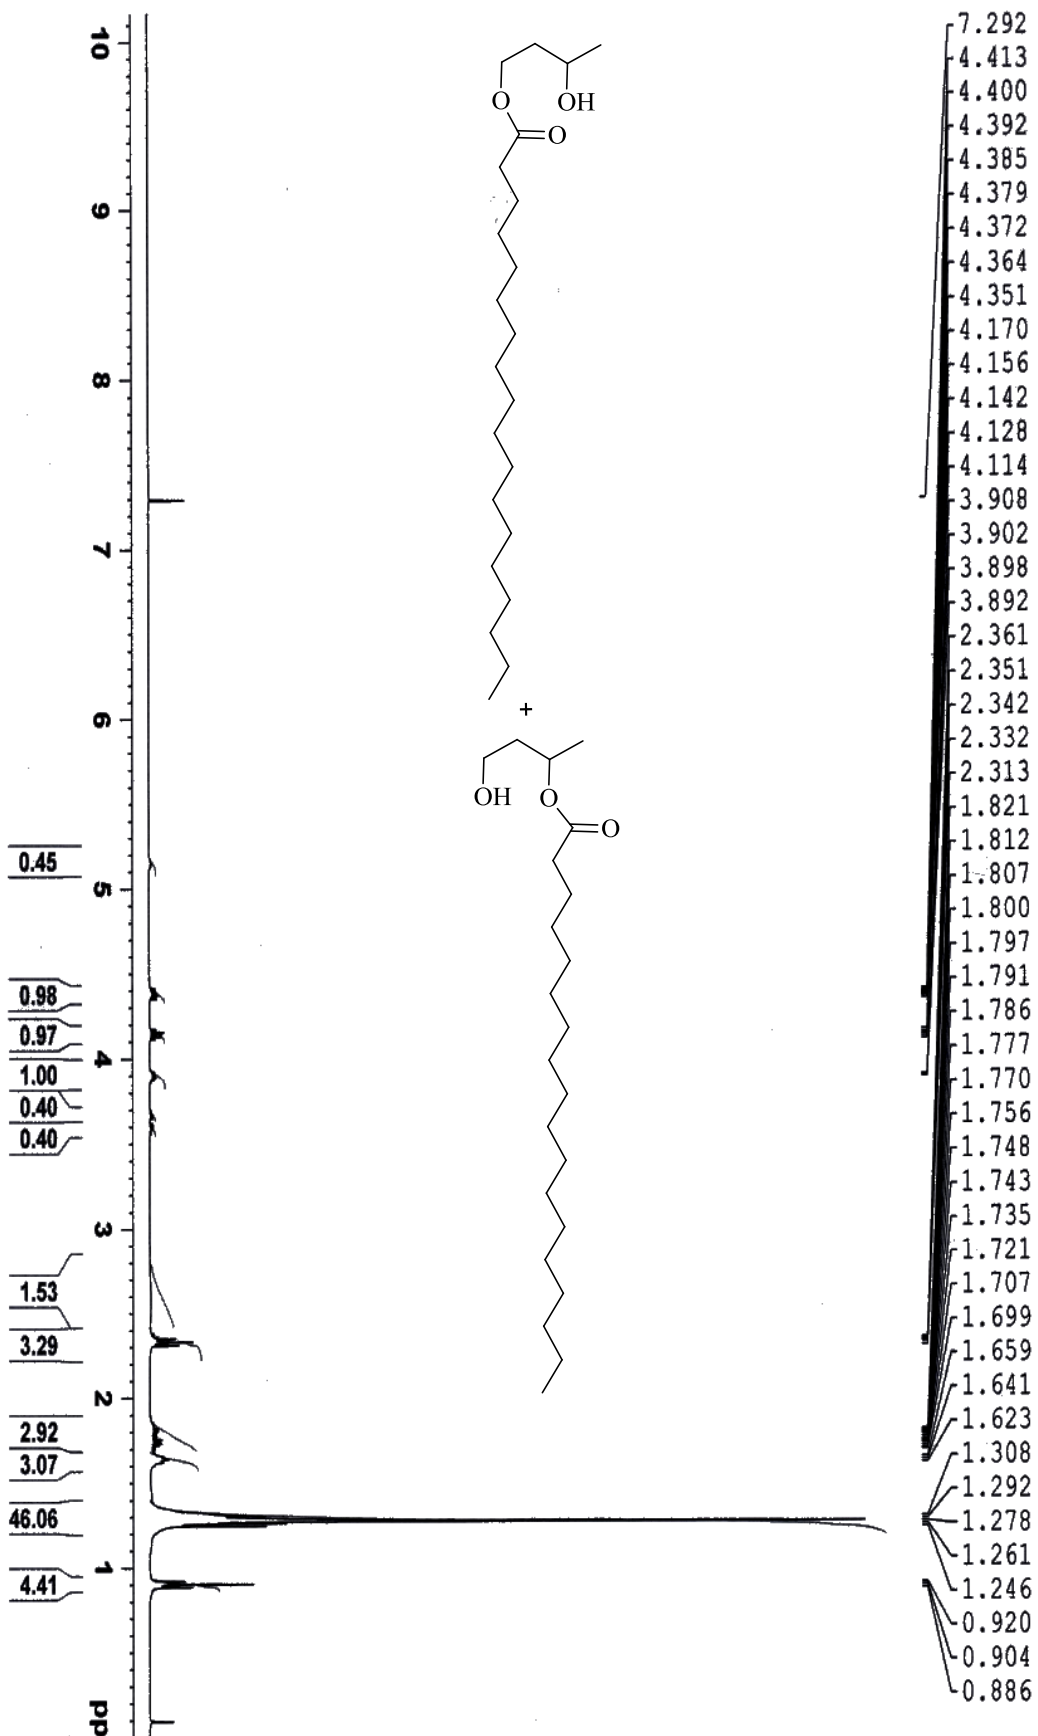

Fig. S67. <sup>1</sup>H NMR 3-Hydroxybutyl stearate compound with 4-hydroxybutan-2-yl stearate (2.5:1)

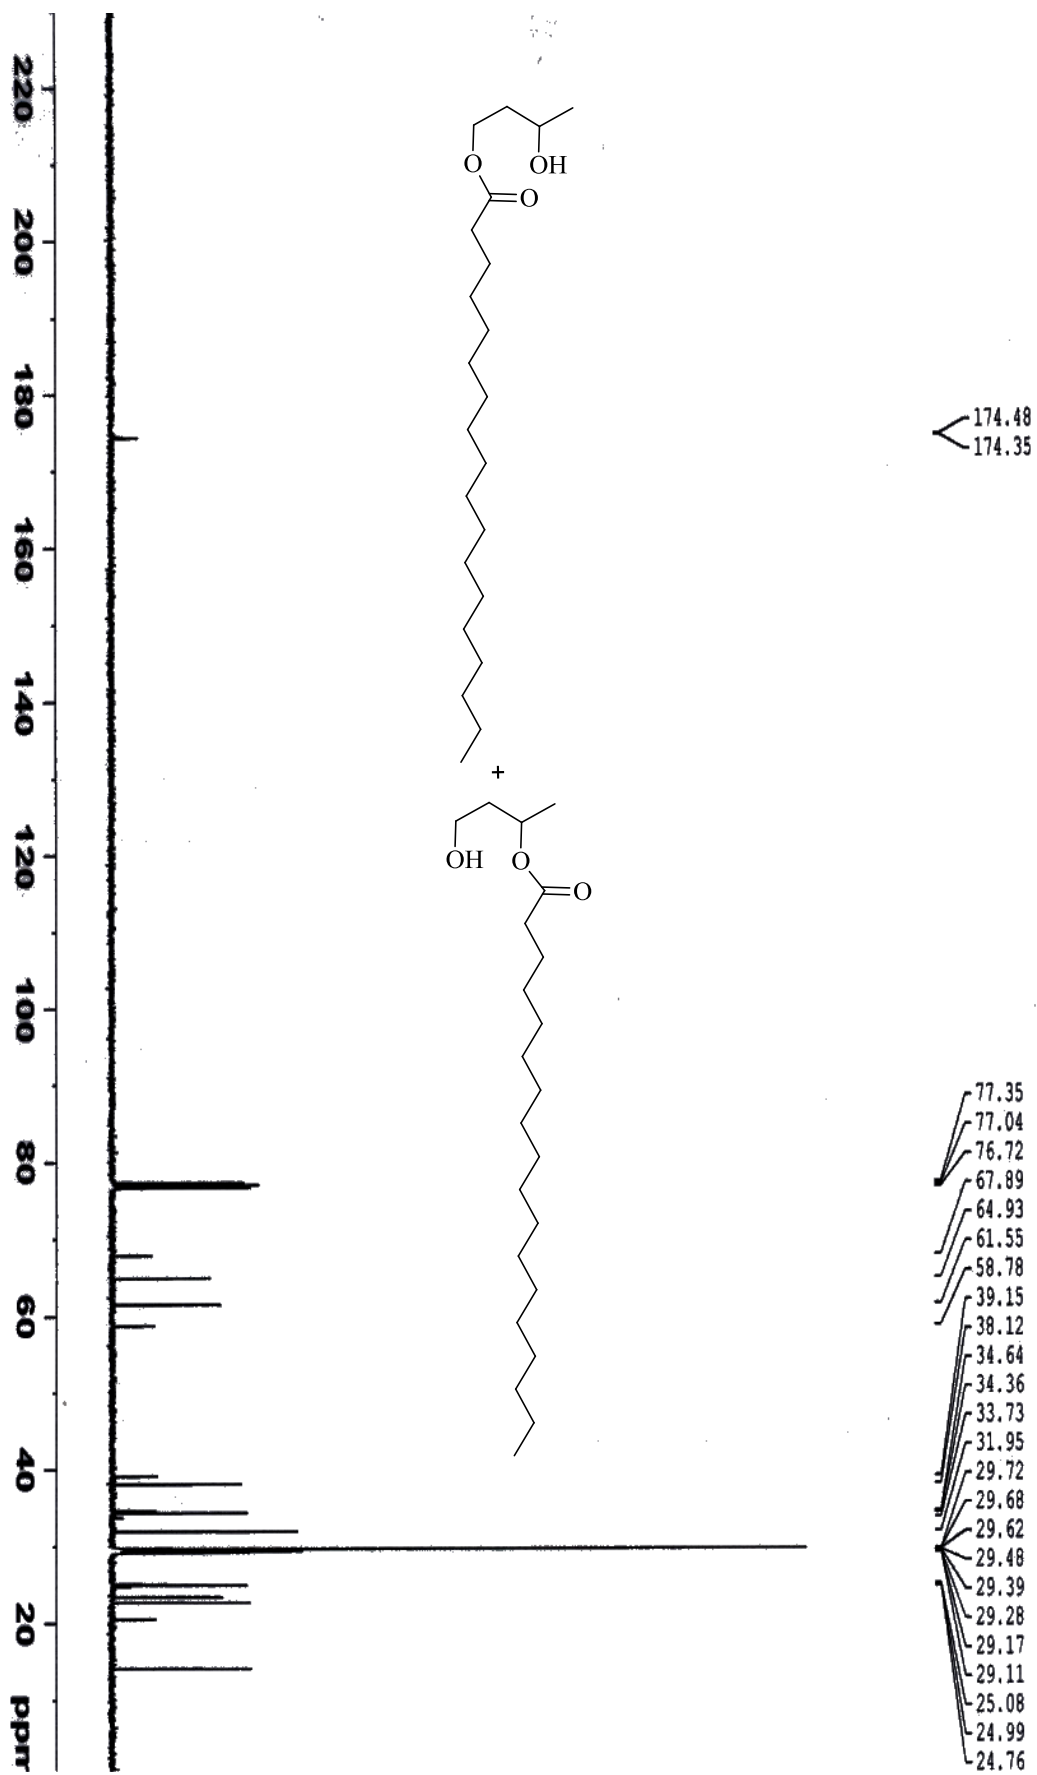

Fig. S68.  $^{13}\text{C}$  NMR 3-Hydroxybutyl stearate compound with 4-hydroxybutan-2-yl stearate (2.5:1)

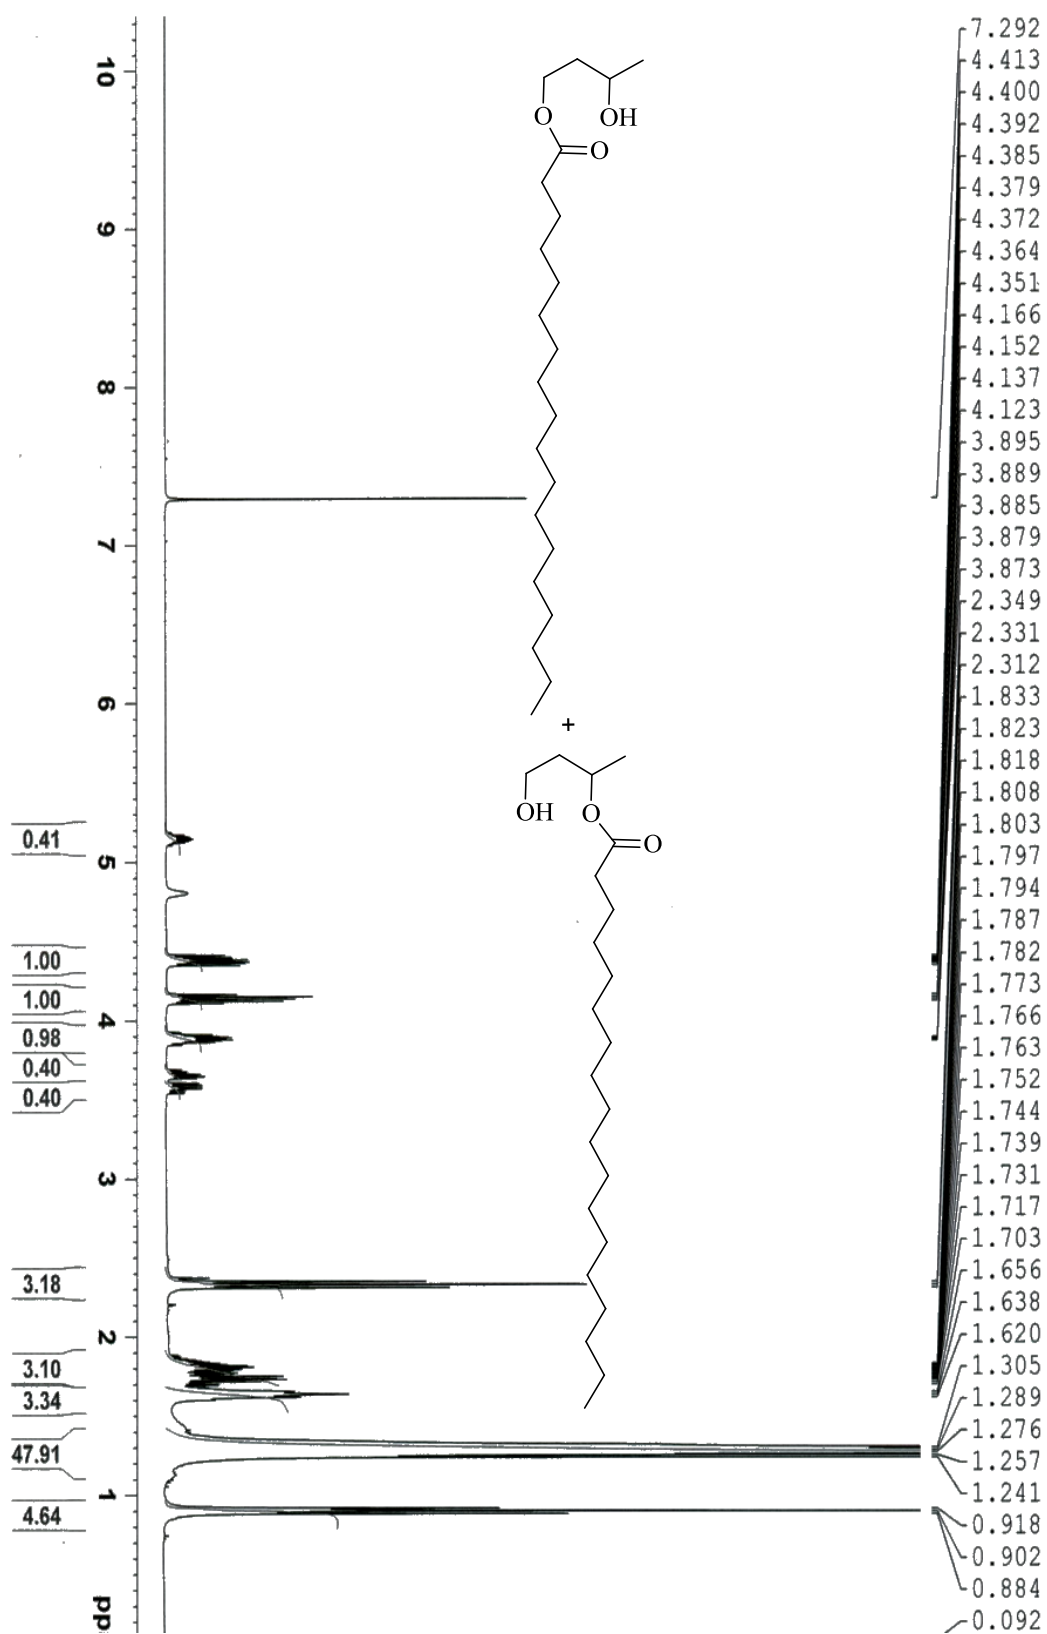

Fig. S69. <sup>1</sup>H NMR (D<sub>2</sub>O) 3-Hydroxybutyl stearate compound with 4-hydroxybutan-2-yl stearate (2.5:1)

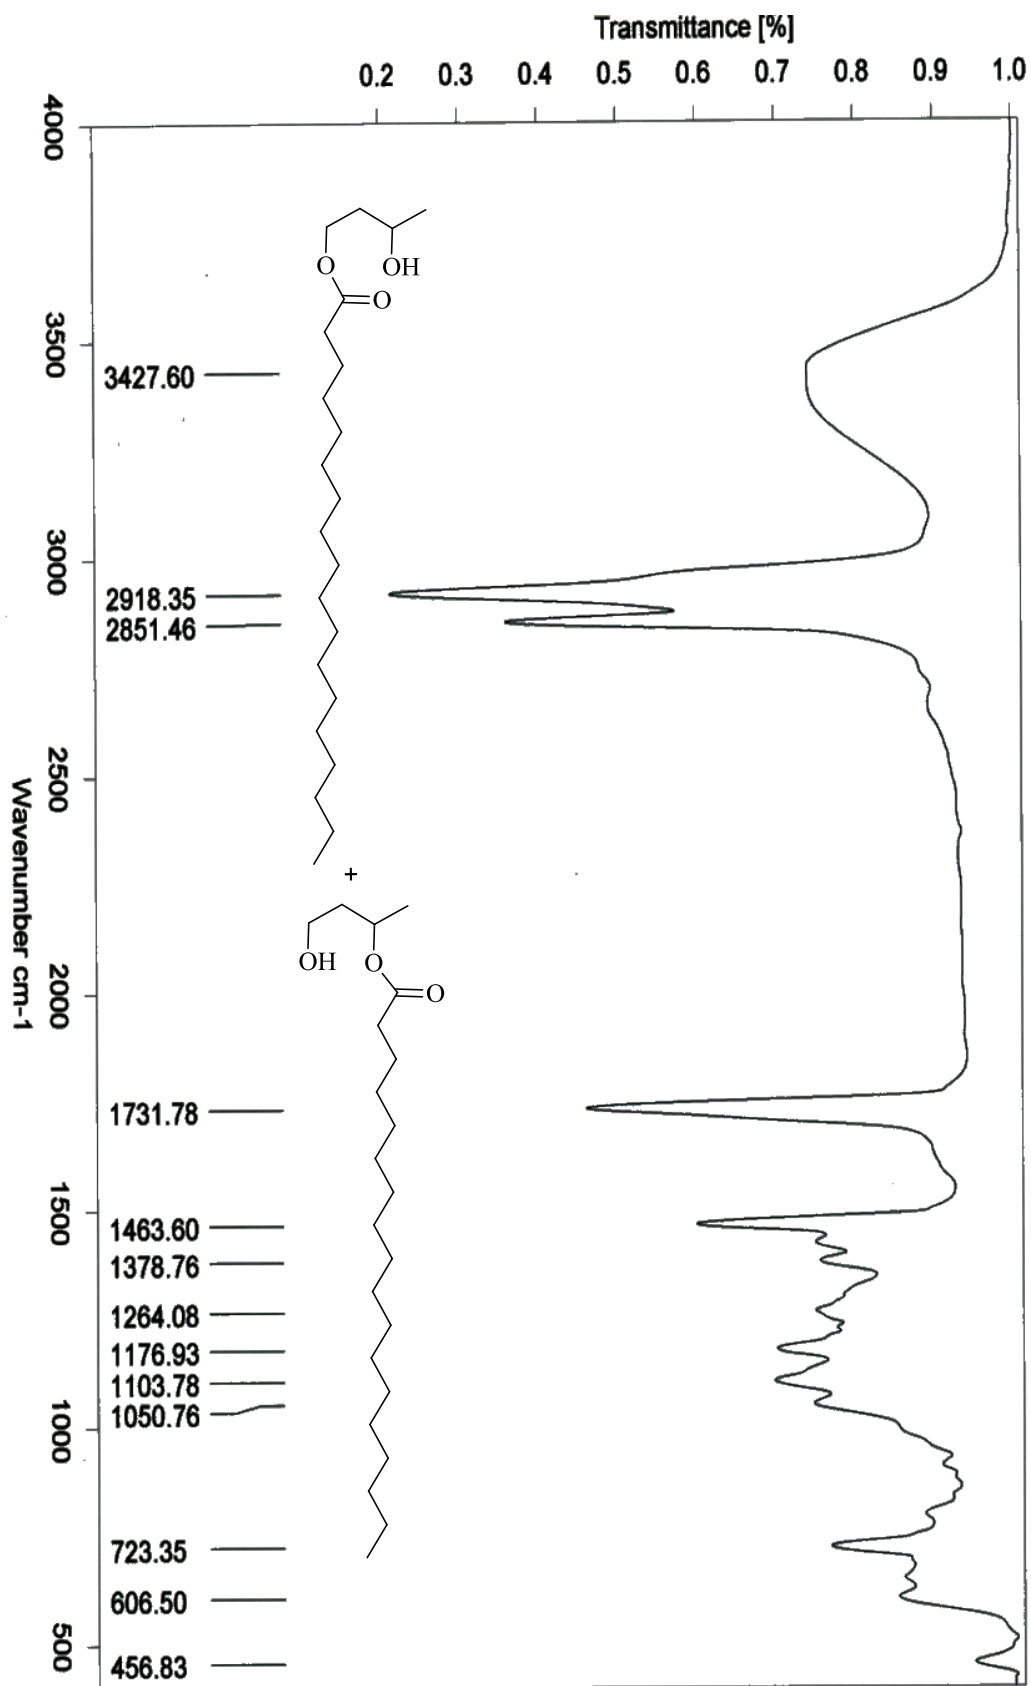

Fig. S70. IR (neat) 3-Hydroxybutyl stearate compound with 4-hydroxybutan-2-yl stearate (2.5:1)

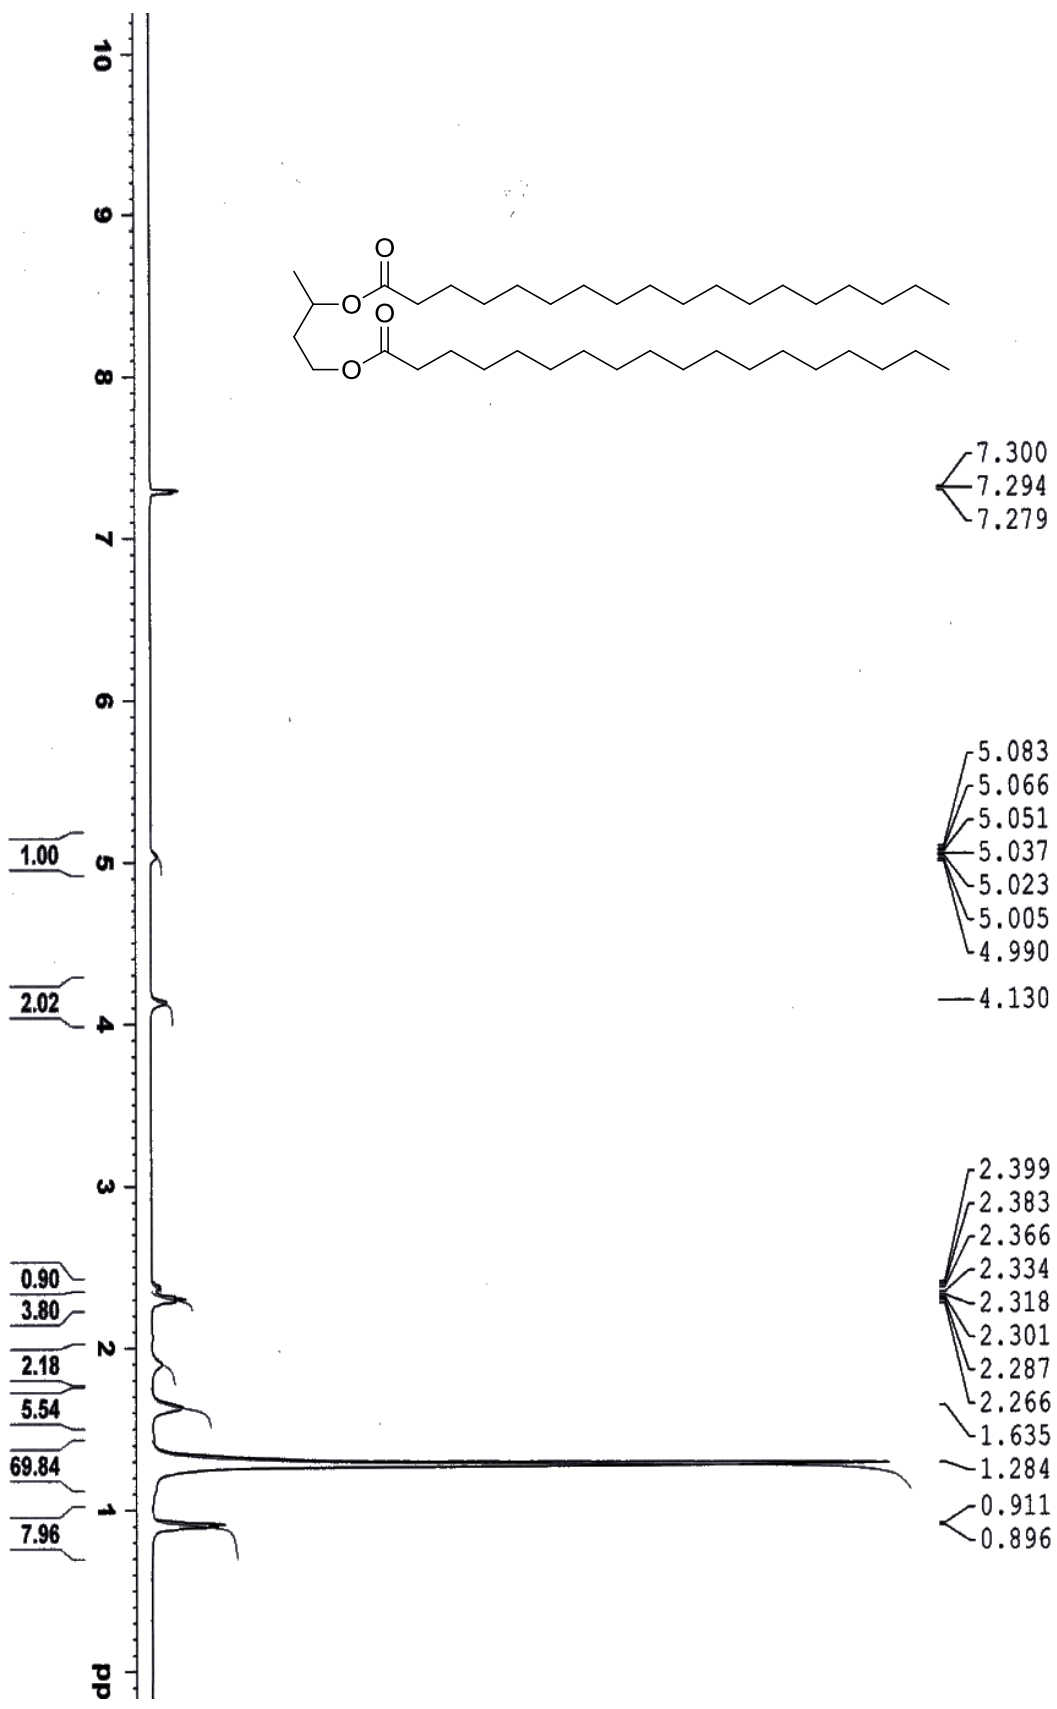

Fig. S71. <sup>1</sup>H NMR Butane-1,3-diyl distearate

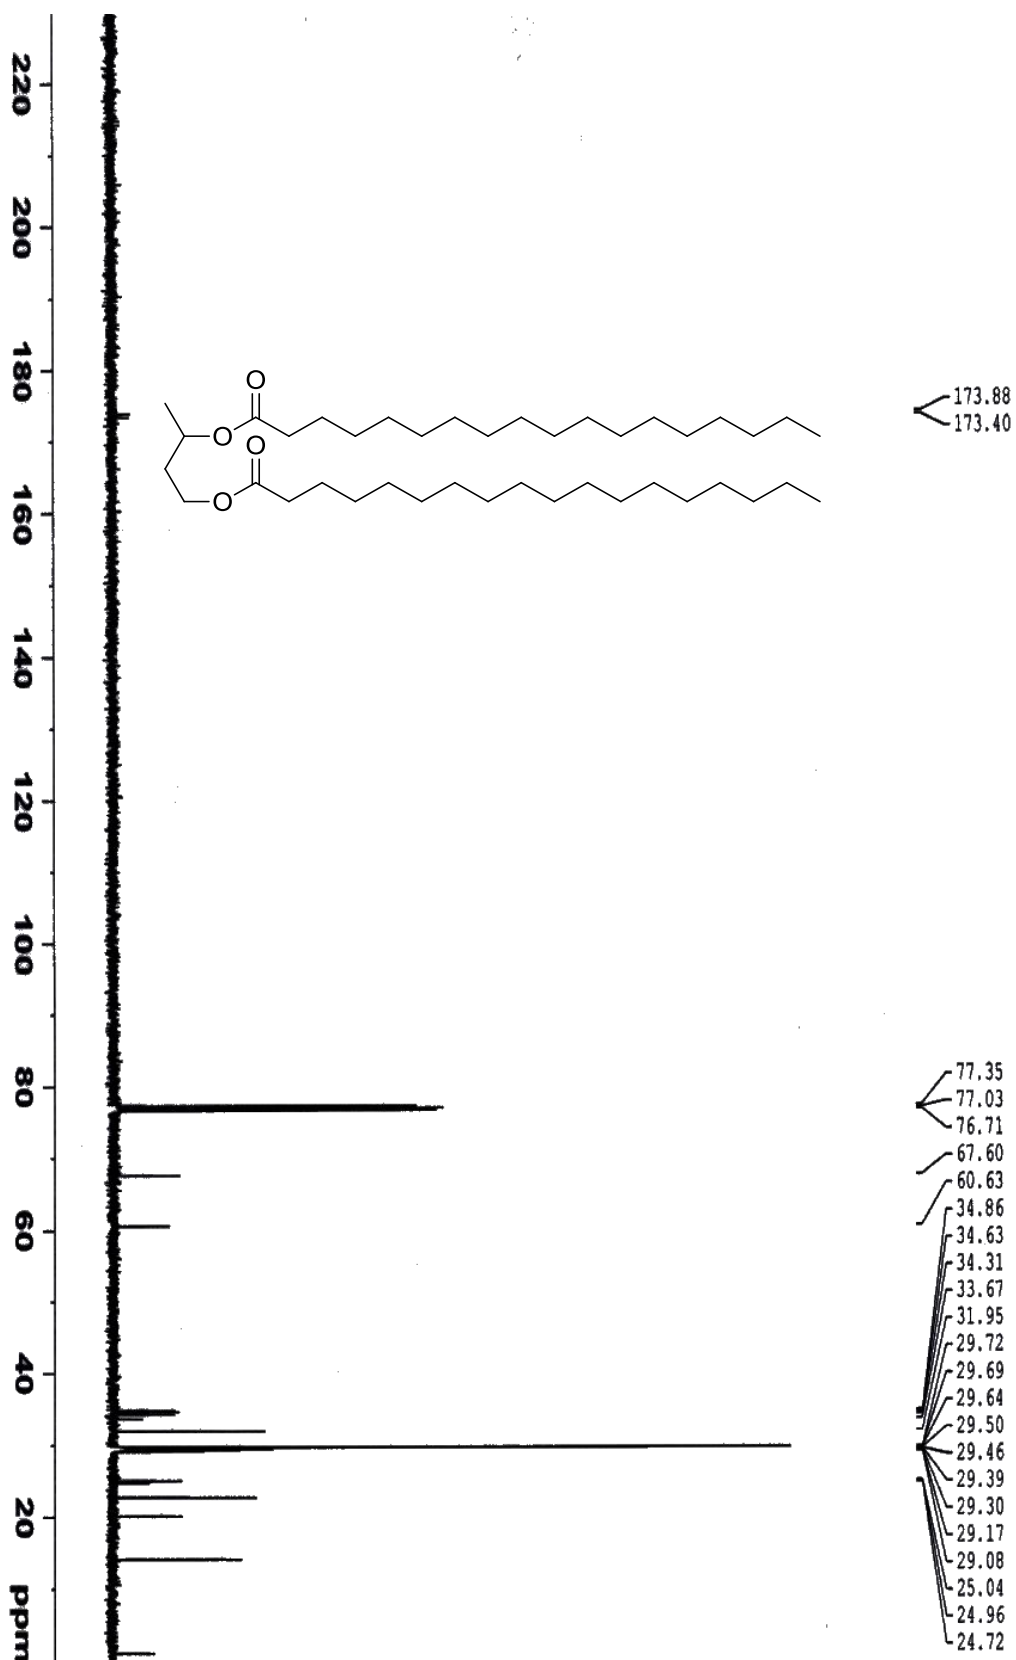

Fig. S72.  $^{13}\text{C}$  NMR Butane-1,3-diyl distearate



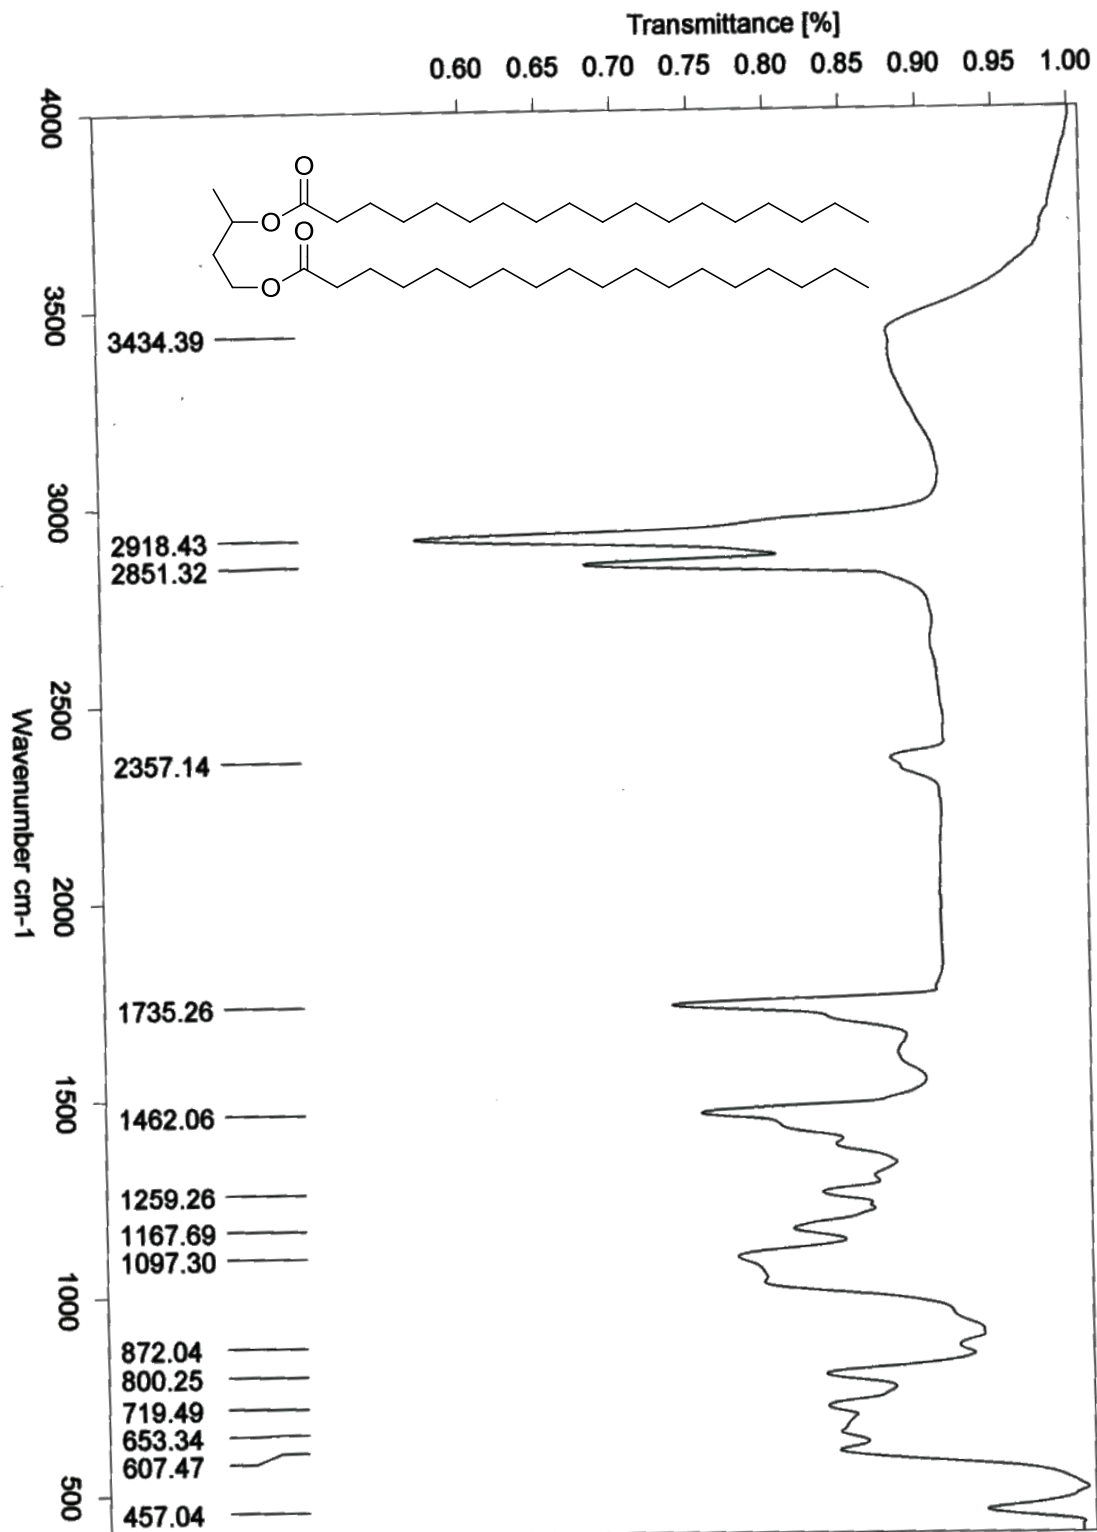

Fig. S73. IR (neat) butane-1,3-diyl distearate

### 1-12 References

- <sup>1</sup> B. Karimi, H. M. Mirzaei and A. Mobaraki, *Catal. Sci. Technol.*, 2012, **2**, 828.

<sup>2</sup> D. Margolese, J. A. Melero, S. C. Christiansen, B. F. Chmelka and G. D. Stucky, *Chem. Mater.*, 2000, **12**, 2448.

<sup>3</sup> B. Karimi and D. Zareyee, *Org. Lett.*, 2008, **10**, 3989.
